# Supplementary material for: Selenium, antioxidants, cardiovascular disease, and all-cause mortality: a systematic review and meta-analysis of randomized controlled trials
Source: PubMed Central journal article supplement — Am J Clin Nutr. 2020 Oct 14;112(6):1642–52. doi: 10.1093/ajcn/nqaa245 (PMC7727482; doi:10.1093/ajcn/nqaa245), 2020-10-14
Supplement: nqaa245_supplemental_file.pdf [file nqaa245_supplemental_file.pdf]

**Selenium, antioxidants, cardiovascular disease, and all-cause mortality: a systematic review and meta-analysis of randomized controlled trials**

**David JA Jenkins**

**ONLINE SUPPORTING MATERIAL**

**Selenium, antioxidants, cardiovascular disease, and all-cause mortality: a systematic review and meta-analysis of randomized controlled trials.**

David JA Jenkins, MD, PhD<sup>1,2,3,4,5</sup>; David Kitts, PhD<sup>6</sup>; Edward L Giovannucci, MD, ScD<sup>7</sup>; Sandhya Sahye-Pudaruth, MPH, RD<sup>1,4</sup>; Melanie Paquette, MSc, RD<sup>1,4</sup>; Sonia Blanco Mejia, MD MSc<sup>1,3,4</sup>; Darshna Patel, BA<sup>1,4</sup>; Meaghan Kavanagh, MSc<sup>1,4</sup>; Tom Tsirakis, BA<sup>4</sup>; Cyril WC Kendall<sup>1,3,4,11</sup>, PhD; Sathish C. Pichika, MSc<sup>4</sup>; John L Sievenpiper, MD, PhD<sup>1,2,3,4,5</sup>

<sup>1</sup>Department of Nutritional Sciences, Faculty of Medicine, University of Toronto, Toronto, Ontario, Canada; <sup>2</sup>Li Ka Shing Knowledge Institute, <sup>3</sup>Toronto 3D Knowledge Synthesis and Clinical Trials Unit, <sup>4</sup>Clinical Nutrition Risk Factor Modification Centre, and <sup>5</sup>Division of Endocrinology and Metabolism, St. Michael's Hospital, 30 Bond Street, Toronto, Ontario, Canada; <sup>6</sup>Food Nutrition and Health, Faculty of Land and Food Systems, University of British Columbia, Vancouver, B.C, Canada, <sup>7</sup>Department of Nutrition and Epidemiology, Harvard TH Chan School of Public Health, Boston, MA, USA; <sup>11</sup>College of Pharmacy and Nutrition, University of Saskatchewan, Saskatoon, Canada.

**Supplementary Tables**

**Supplementary Table 1.** Search Strategy.

**Supplementary Table 2.** NNT/NNH calculations (Methods A and B)

**Supplementary Table 3.** Characteristics of included RCT studies for CVD, CVD outcomes, cancer, cancer mortality, and all-cause mortality.

**Supplementary Table 4.** GRADE assessment for antioxidants and CVD, CVD outcomes, cancer, cancer mortality, and all-cause mortality.

**Supplementary Table 5.** GRADE assessment for selenium and CVD, CVD outcomes, cancer, cancer mortality, and all-cause mortality.

**Supplementary Figures**

**Supplementary Figure 1.** Search Summary.

**Supplementary Figure 2.** Risk of bias summary for antioxidant supplementation and CVD, CVD outcomes, cancer, cancer mortality, and all-cause mortality.

**Supplementary Figure 3.** Risk of bias summary for selenium supplementation only and CVD, CVD outcomes, cancer, cancer mortality, and all-cause mortality.

**Supplementary Figure 4.** Forest plot of selenium supplementation only and total CVD risk.

**Supplementary Figure 5.** Forest plot of selenium supplementation only and total CHD risk

**Supplementary Figure 6.** Forest plot of selenium supplementation only and MI risk.

**Supplementary Figure 7.** Forest plot of selenium supplementation only and stroke risk.

**Supplementary Figure 8.** Forest plot of selenium supplementation only and CVD mortality risk.

**Supplementary Figure 9.** Forest plot of selenium supplementation only and CHD mortality risk.

**Supplementary Figure 10.** Forest plot of selenium supplementation only and MI mortality risk.

**Supplementary Figure 11.** Forest plot of selenium supplementation only and stroke mortality risk.

**Supplementary Figure 12.** Forest plot of selenium supplementation only and total cancer risk.

## ONLINE SUPPORTING MATERIAL

**Supplementary Figure 13.** Forest plot of selenium supplementation only and cancer mortality risk.

**Supplementary Figure 14.** Forest plot of selenium supplementation only and all-cause mortality risk.

**Supplementary Figure 15.** Funnel plot of selenium supplementation and all-cause mortality risk.

**Supplementary Figure 16.** Forest plot of antioxidant supplementation and total CVD risk.

**Supplementary Figure 17.** Forest plot of antioxidant supplementation and total CHD risk

**Supplementary Figure 18.** Forest plot of antioxidant supplementation and MI risk.

**Supplementary Figure 19.** Forest plot of antioxidant supplementation and stroke risk.

**Supplementary Figure 20.** Forest plot of antioxidant supplementation and CVD mortality risk.

**Supplementary Figure 21.** Forest plot of antioxidant supplementation and CHD mortality risk.

**Supplementary Figure 22.** Forest plot of antioxidant supplementation and MI mortality risk.

**Supplementary Figure 23.** Forest plot of antioxidant supplementation and stroke mortality risk.

**Supplementary Figure 24.** Forest plot of antioxidant supplementation and total cancer risk.

**Supplementary Figure 25.** Forest plot of antioxidant supplementation and cancer mortality risk.

**Supplementary Figure 26.** Forest plot of antioxidant supplementation and all-cause mortality risk.

**Supplementary Figure 27.** Funnel plot of antioxidant supplementation and total CVD, MI, stroke, CVD mortality, and all-cause mortality risk.

**Supplementary Figure 28.** Sensitivity analysis of antioxidant supplementation and total CVD risk for studies with and without selenium.

**Supplementary Figure 29.** Sensitivity analysis of antioxidant supplementation and total CHD risk for studies with and without selenium.

**Supplementary Figure 30.** Sensitivity analysis of antioxidant supplementation and MI risk for studies with and without selenium.

**Supplementary Figure 31.** Sensitivity analysis of antioxidant supplementation and stroke risk for studies with and without selenium.

**Supplementary Figure 32.** Sensitivity analysis of antioxidant supplementation and CVD mortality risk for studies with and without selenium.

**Supplementary Figure 33.** Sensitivity analysis of antioxidant supplementation and CHD mortality risk for studies with and without selenium.

**Supplementary Figure 34.** Sensitivity analysis of antioxidant supplementation and MI mortality risk for studies with and without selenium.

**Supplementary Figure 35.** Sensitivity analysis of antioxidant supplementation and stroke mortality risk for studies with and without selenium.

**Supplementary Figure 36.** Sensitivity analysis of antioxidant supplementation and total cancer risk for studies with and without selenium.

**Supplementary Figure 37.** Sensitivity analysis of antioxidant supplementation and cancer mortality risk for studies with and without selenium.

**Supplementary Figure 38.** Sensitivity analysis of antioxidant supplementation and all-cause mortality risk for studies with and without selenium.

**Supplementary Figure 39.** Forest plot showing the dose response analysis of selenium supplementation only and all-cause mortality.

**Supplementary Figure 40.** Forest plot showing the dose response analysis of antioxidant supplementation and all-cause mortality for studies with selenium.

## ONLINE SUPPORTING MATERIAL

**Supplementary Figure 41.** Linear dose-response relationship between selenium intake and all-cause mortality risk in trials with antioxidant intake.

**Supplementary Figure 42.** Non-linear dose-response relationship between selenium intake and all-cause mortality risk in trials with antioxidant intake

**Supplementary Figure 43.** Forest plot showing antioxidants (with and without selenium) and total CVD by risk group.

**Supplementary Figure 44.** Forest plot showing antioxidants (with and without selenium) and CVD mortality by risk group.

**Supplementary Figure 45.** Forest plot showing antioxidants (with and without selenium) and all-cause mortality by risk group.

**Supplementary Figure 46.** Sensitivity analysis of antioxidant supplementation and total CVD risk for studies with and without vitamin A.

**Supplementary Figure 47.** Sensitivity analysis of antioxidant supplementation and total CHD risk for studies with and without vitamin A.

**Supplementary Figure 48.** Sensitivity analysis of antioxidant supplementation and MI risk for studies with and without vitamin A.

**Supplementary Figure 49.** Sensitivity analysis of antioxidant supplementation and stroke risk for studies with and without vitamin A.

**Supplementary Figure 50.** Sensitivity analysis of antioxidant supplementation and CVD mortality risk for studies with and without vitamin A.

**Supplementary Figure 51.** Sensitivity analysis of antioxidant supplementation and CHD mortality risk for studies with and without vitamin A.

**Supplementary Figure 52.** Sensitivity analysis of antioxidant supplementation and MI mortality risk for studies with and without vitamin A.

**Supplementary Figure 53.** Sensitivity analysis of antioxidant supplementation and stroke mortality risk for studies with and without vitamin A.

**Supplementary Figure 54.** Sensitivity analysis of antioxidant supplementation and total cancer risk for studies with and without vitamin A.

**Supplementary Figure 55.** Sensitivity analysis of antioxidant supplementation and cancer mortality risk for studies with and without vitamin A.

**Supplementary Figure 56.** Sensitivity analysis of antioxidant supplementation and all-cause mortality risk for studies with and without vitamin A.

**Supplementary Figure 57.** Sensitivity analysis of antioxidant supplementation and total CVD risk for studies with and without vitamin C.

**Supplementary Figure 58.** Sensitivity analysis of antioxidant supplementation and total CHD risk for studies with and without vitamin C.

**Supplementary Figure 59.** Sensitivity analysis of antioxidant supplementation and MI risk for studies with and without vitamin C.

**Supplementary Figure 60.** Sensitivity analysis of antioxidant supplementation and stroke risk for studies with and without vitamin C.

**Supplementary Figure 61.** Sensitivity analysis of antioxidant supplementation and CVD mortality risk for studies with and without vitamin C.

**Supplementary Figure 62.** Sensitivity analysis of antioxidant supplementation and CHD mortality risk for studies with and without vitamin C.

## ONLINE SUPPORTING MATERIAL

**Supplementary Figure 63.** Sensitivity analysis of antioxidant supplementation and MI mortality risk for studies with and without vitamin C.

**Supplementary Figure 64.** Sensitivity analysis of antioxidant supplementation and stroke mortality risk for studies with and without vitamin C.

**Supplementary Figure 65.** Sensitivity analysis of antioxidant supplementation and total cancer risk for studies with and without vitamin C.

**Supplementary Figure 66.** Sensitivity analysis of antioxidant supplementation and cancer mortality risk for studies with and without vitamin C.

**Supplementary Figure 67.** Sensitivity analysis of antioxidant supplementation and all-cause mortality risk for studies with and without vitamin C.

**Supplementary Figure 68.** Sensitivity analysis of antioxidant supplementation and total CVD risk for studies with and without vitamin E.

**Supplementary Figure 69.** Sensitivity analysis of antioxidant supplementation and total CHD risk for studies with and without vitamin E.

**Supplementary Figure 70.** Sensitivity analysis of antioxidant supplementation and MI risk for studies with and without vitamin E.

**Supplementary Figure 71.** Sensitivity analysis of antioxidant supplementation and stroke risk for studies with and without vitamin E.

**Supplementary Figure 72.** Sensitivity analysis of antioxidant supplementation and CVD mortality risk for studies with and without vitamin E.

**Supplementary Figure 73.** Sensitivity analysis of antioxidant supplementation and CHD mortality risk for studies with and without vitamin E.

**Supplementary Figure 74.** Sensitivity analysis of antioxidant supplementation and MI mortality risk for studies with and without vitamin E.

**Supplementary Figure 75.** Sensitivity analysis of antioxidant supplementation and stroke mortality risk for studies with and without vitamin E.

**Supplementary Figure 76.** Sensitivity analysis of antioxidant supplementation and total cancer risk for studies with and without vitamin E.

**Supplementary Figure 77.** Sensitivity analysis of antioxidant supplementation and cancer mortality risk for studies with and without vitamin E.

**Supplementary Figure 78.** Sensitivity analysis of antioxidant supplementation and all-cause mortality risk for studies with and without vitamin E.

**Supplementary Figure 79.** Sensitivity analysis of antioxidant supplementation and total CVD risk for studies with and without beta-carotene.

**Supplementary Figure 80.** Sensitivity analysis of antioxidant supplementation and total CHD risk for studies with and without beta-carotene.

**Supplementary Figure 81.** Sensitivity analysis of antioxidant supplementation and MI risk for studies with and without beta-carotene.

**Supplementary Figure 82.** Sensitivity analysis of antioxidant supplementation and stroke risk for studies with and without beta-carotene.

**Supplementary Figure 83.** Sensitivity analysis of antioxidant supplementation and CVD mortality risk for studies with and without beta-carotene.

**Supplementary Figure 84.** Sensitivity analysis of antioxidant supplementation and CHD mortality risk for studies with and without beta-carotene.

## ONLINE SUPPORTING MATERIAL

**Supplementary Figure 85.** Sensitivity analysis of antioxidant supplementation and MI mortality risk for studies with and without beta-carotene.

**Supplementary Figure 86.** Sensitivity analysis of antioxidant supplementation and stroke mortality risk for studies with and without beta-carotene.

**Supplementary Figure 87.** Sensitivity analysis of antioxidant supplementation and total cancer risk for studies with and without beta-carotene.

**Supplementary Figure 88.** Sensitivity analysis of antioxidant supplementation and cancer mortality risk for studies with and without beta-carotene.

**Supplementary Figure 89.** Sensitivity analysis of antioxidant supplementation and all-cause mortality risk for studies with and without beta-carotene.

**Supplementary Figure 90.** Sensitivity analysis of antioxidant supplementation and total CVD risk for studies with and without zinc.

**Supplementary Figure 91.** Sensitivity analysis of antioxidant supplementation and total CHD risk for studies with and without zinc.

**Supplementary Figure 92.** Sensitivity analysis of antioxidant supplementation and MI risk for studies with and without zinc.

**Supplementary Figure 93.** Sensitivity analysis of antioxidant supplementation and stroke risk for studies with and without zinc.

**Supplementary Figure 94.** Sensitivity analysis of antioxidant supplementation and CVD mortality risk for studies with and without zinc.

**Supplementary Figure 95.** Sensitivity analysis of antioxidant supplementation and CHD mortality risk for studies with and without zinc.

**Supplementary Figure 96.** Sensitivity analysis of antioxidant supplementation and MI mortality risk for studies with and without zinc.

**Supplementary Figure 97.** Sensitivity analysis of antioxidant supplementation and stroke mortality risk for studies with and without zinc.

**Supplementary Figure 98.** Sensitivity analysis of antioxidant supplementation and total cancer risk for studies with and without zinc.

**Supplementary Figure 99.** Sensitivity analysis of antioxidant supplementation and cancer mortality risk for studies with and without zinc.

**Supplementary Figure 100.** Sensitivity analysis of antioxidant supplementation and all-cause mortality risk for studies with and without zinc.

**Supplementary Figure 101.** Sensitivity analysis of antioxidant supplementation and total CVD risk for studies with and without retinol.

**Supplementary Figure 102.** Sensitivity analysis of antioxidant supplementation and total CHD risk for studies with and without retinol.

**Supplementary Figure 103.** Sensitivity analysis of antioxidant supplementation and MI risk for studies with and without retinol.

**Supplementary Figure 104.** Sensitivity analysis of antioxidant supplementation and stroke risk for studies with and without retinol.

**Supplementary Figure 105.** Sensitivity analysis of antioxidant supplementation and CVD mortality risk for studies with and without retinol.

**Supplementary Figure 106.** Sensitivity analysis of antioxidant supplementation and CHD mortality risk for studies with and without retinol.

## ONLINE SUPPORTING MATERIAL

**Supplementary Figure 107.** Sensitivity analysis of antioxidant supplementation and MI mortality risk for studies with and without retinol.

**Supplementary Figure 108.** Sensitivity analysis of antioxidant supplementation and stroke mortality risk for studies with and without retinol.

**Supplementary Figure 109.** Sensitivity analysis of antioxidant supplementation and total cancer risk for studies with and without retinol.

**Supplementary Figure 110.** Sensitivity analysis of antioxidant supplementation and cancer mortality risk for studies with and without retinol.

**Supplementary Figure 111.** Sensitivity analysis of antioxidant supplementation and all-cause mortality risk for studies with and without retinol.

**Supplementary Figure 112.** Forest plot showing antioxidants (without selenium) by region and all-cause mortality.

**Supplementary Figure 113.** Forest plot showing antioxidants (without selenium) by region and total CVD.

**Supplementary Figure 114.** Forest plot showing antioxidants (without selenium) by region and CVD mortality.

## ONLINE SUPPORTING MATERIAL

**Supplementary Table 1. Search Strategy.** Search was done from database inception to June 5<sup>th</sup> 2020.

| Databases | Search Terms                                                                                                                                                                                                                                                                                                                                                                                                                                                                                                                                                                                                                                                                                                                                                                                                                                                                                                                                                                                                                                                                                                                                                                                                                              |
|-----------|-------------------------------------------------------------------------------------------------------------------------------------------------------------------------------------------------------------------------------------------------------------------------------------------------------------------------------------------------------------------------------------------------------------------------------------------------------------------------------------------------------------------------------------------------------------------------------------------------------------------------------------------------------------------------------------------------------------------------------------------------------------------------------------------------------------------------------------------------------------------------------------------------------------------------------------------------------------------------------------------------------------------------------------------------------------------------------------------------------------------------------------------------------------------------------------------------------------------------------------------|
| MEDLINE   | <ol style="list-style-type: none"> <li>1. exp Dietary Supplements/</li> <li>2. supplement*.mp.</li> <li>3. exp ANTIOXIDANTS/</li> <li>4. antioxidant*.mp.</li> <li>5. exp Vitamin A/</li> <li>6. vitamin A.mp.</li> <li>7. retinol.mp.</li> <li>8. vitamin C.mp.</li> <li>9. exp Ascorbic Acid/</li> <li>10. ascorbic acid.mp.</li> <li>11. exp Vitamin E/</li> <li>12. vitamin E.mp.</li> <li>13. alpha tocopherol.mp.</li> <li>14. beta carotene.mp.</li> <li>15. alpha carotene.mp.</li> <li>16. selenium.mp.</li> <li>17. zinc.mp.</li> <li>18. copper.mp.</li> <li>19. exp Cardiovascular Diseases/</li> <li>20. cardiovascular disease*.mp.</li> <li>21. coronary heart disease*.mp.</li> <li>22. coronary artery disease*.mp.</li> <li>23. acute coronary syndrome*.mp.</li> <li>24. myocardial ischemia*.mp.</li> <li>25. ischemic heart disease*.mp.</li> <li>26. heart infarction*.mp.</li> <li>27. myocardial infarction*.mp.</li> <li>28. stroke*.mp.</li> <li>29. cerebrovascular*.mp.</li> <li>30. cardiovascular mortality.mp.</li> <li>31. cardiovascular death.mp.</li> <li>32. exp MORTALITY/</li> <li>33. mortality.mp.</li> <li>34. exp DEATH/</li> <li>35. death.mp.</li> <li>36. all cause mortality.mp.</li> </ol> |

## ONLINE SUPPORTING MATERIAL

|  |                                                                                                                                                                                                                                                                                                                                                                                                                                                                                                                                                                                                                                                                                                                                                                                                                                                                                                                                                                                                                                                                                                                                                                                                                                                                                                                                                                                                                                                                                                                                                                                                                                                                                                                                                                                                                                                                                                                                                                                                                                                                                                                    |
|--|--------------------------------------------------------------------------------------------------------------------------------------------------------------------------------------------------------------------------------------------------------------------------------------------------------------------------------------------------------------------------------------------------------------------------------------------------------------------------------------------------------------------------------------------------------------------------------------------------------------------------------------------------------------------------------------------------------------------------------------------------------------------------------------------------------------------------------------------------------------------------------------------------------------------------------------------------------------------------------------------------------------------------------------------------------------------------------------------------------------------------------------------------------------------------------------------------------------------------------------------------------------------------------------------------------------------------------------------------------------------------------------------------------------------------------------------------------------------------------------------------------------------------------------------------------------------------------------------------------------------------------------------------------------------------------------------------------------------------------------------------------------------------------------------------------------------------------------------------------------------------------------------------------------------------------------------------------------------------------------------------------------------------------------------------------------------------------------------------------------------|
|  | <p>37. exp Neoplasms/<br/> 38. neoplasm*.mp.<br/> 39. cancer*.mp.<br/> 40. 1 or 2<br/> 41. 3 or 4 or 5 or 6 or 7 or 8 or 9 or 10 or 11 or 12 or 13 or 14 or 15 or 16 or 17 or 18<br/> 42. 19 or 20 or 21 or 22 or 23 or 24 or 25 or 26 or 27 or 28 or 29 or 30 or 31 or 32 or 33 or 34 or 35 or 36 or 37 or 38 or 39<br/> 43. 40 and 41 and 42<br/> 44. "randomized controlled trial".pt.<br/> 45. (random\$ or placebo\$ or single blind\$ or double blind\$ or triple blind\$).ti,ab.<br/> 46. (retraction of publication or retracted publication).pt.<br/> 47. or/44-46<br/> 48. (animals not humans).sh.<br/> 49. ((comment or editorial or meta-analysis or practice-guideline or review or letter or journal correspondence) not "randomized controlled trial").pt.<br/> 50. (random sampl\$ or random digit\$ or random effect\$ or random survey or random regression).ti,ab. not "randomized controlled trial".pt.<br/> 51. 47 not (48 or 49 or 50)<br/> 52. (review or review,tutorial or review, academic).pt.<br/> 53. (medline or medlars or embase or pubmed or cochrane).tw,sh.<br/> 54. (scisearch or psychinfo or psycinfo).tw,sh.<br/> 55. (psychlit or psyclit).tw,sh.<br/> 56. cinahl.tw,sh.<br/> 57. ((hand adj2 search\$) or (manual\$ adj2 search\$)).tw,sh.<br/> 58. (electronic database\$ or bibliographic database\$ or computeri?ed database\$ or online database\$).tw,sh.<br/> 59. (pooling or pooled or mantel haenszel).tw,sh.<br/> 60. (peto or dersimonian or der simonian or fixed effect).tw,sh.<br/> 61. (retraction of publication or retracted publication).pt.<br/> 62. or/53-61<br/> 63. 52 and 62<br/> 64. meta-analysis.pt.<br/> 65. meta-analysis.sh.<br/> 66. (meta-analys\$ or meta analys\$ or metaanalys\$).tw,sh.<br/> 67. (systematic\$ adj5 review\$).tw,sh.<br/> 68. (systematic\$ adj5 overview\$).tw,sh.<br/> 69. (quantitativ\$ adj5 review\$).tw,sh.<br/> 70. (quantitativ\$ adj5 overview\$).tw,sh.<br/> 71. (quantitativ\$ adj5 synthesis\$).tw,sh.<br/> 72. (methodologic\$ adj5 review\$).tw,sh.<br/> 73. (methodologic\$ adj5 overview\$).tw,sh.</p> |
|--|--------------------------------------------------------------------------------------------------------------------------------------------------------------------------------------------------------------------------------------------------------------------------------------------------------------------------------------------------------------------------------------------------------------------------------------------------------------------------------------------------------------------------------------------------------------------------------------------------------------------------------------------------------------------------------------------------------------------------------------------------------------------------------------------------------------------------------------------------------------------------------------------------------------------------------------------------------------------------------------------------------------------------------------------------------------------------------------------------------------------------------------------------------------------------------------------------------------------------------------------------------------------------------------------------------------------------------------------------------------------------------------------------------------------------------------------------------------------------------------------------------------------------------------------------------------------------------------------------------------------------------------------------------------------------------------------------------------------------------------------------------------------------------------------------------------------------------------------------------------------------------------------------------------------------------------------------------------------------------------------------------------------------------------------------------------------------------------------------------------------|



## ONLINE SUPPORTING MATERIAL

|                      |                                                                                                                                                                                                                                                                                                                                                                                                                                                                                                                                                                                                                                                                                                                                                                                                                                                                                                                                                                                                                                                                                                                                             |
|----------------------|---------------------------------------------------------------------------------------------------------------------------------------------------------------------------------------------------------------------------------------------------------------------------------------------------------------------------------------------------------------------------------------------------------------------------------------------------------------------------------------------------------------------------------------------------------------------------------------------------------------------------------------------------------------------------------------------------------------------------------------------------------------------------------------------------------------------------------------------------------------------------------------------------------------------------------------------------------------------------------------------------------------------------------------------------------------------------------------------------------------------------------------------|
|                      | <p>74. (integrative research review\$ or research integration).tw.<br/> 75. or/64-74<br/> 76. 63 or 75<br/> 77. 43 and 51<br/> 78. 43 and 76<br/> 79. 77 or 78<br/> 80. limit 79 to "all child (0 to 18 years)"<br/> 81. 79 not 80</p>                                                                                                                                                                                                                                                                                                                                                                                                                                                                                                                                                                                                                                                                                                                                                                                                                                                                                                      |
| <p><b>EMBASE</b></p> | <ol style="list-style-type: none"> <li>1. exp nutrition supplement/</li> <li>2. supplement*.mp.</li> <li>3. exp antioxidant/</li> <li>4. antioxidant*.mp.</li> <li>5. vitamin A.mp.</li> <li>6. retinol.mp.</li> <li>7. exp ascorbic acid/</li> <li>8. vitamin C.mp.</li> <li>9. ascorbic acid.mp.</li> <li>10. vitamin E.mp.</li> <li>11. alpha tocopherol.mp.</li> <li>12. beta carotene.mp.</li> <li>13. alpha carotene.mp.</li> <li>14. selenium.mp.</li> <li>15. zinc.mp.</li> <li>16.copper.mp</li> <li>17. exp cardiovascular disease/</li> <li>18. cardiovascular disease*.mp.</li> <li>19. coronary heart disease*.mp.</li> <li>20. coronary artery disease*.mp.</li> <li>21. coronary disease*.mp.</li> <li>22. acute coronary syndrome*.mp.</li> <li>23. ischemic heart disease*.mp.</li> <li>24. myocardial ischemia*.mp.</li> <li>25. heart infarction*.mp.</li> <li>26. acute heart infarction*.mp.</li> <li>27. myocardial infarction*.mp.</li> <li>28. stroke*.mp.</li> <li>29. cerebrovascular*.mp.</li> <li>30. cardiovascular mortality.mp.</li> <li>31. cardiovascular death.mp.</li> <li>32. exp mortality/</li> </ol> |

## ONLINE SUPPORTING MATERIAL

|                 |                                                                                                                                                                                                                                                                                                                                                                                                                                                                                                                                                                                                                                                                                                                                                                                                                                                                                                                                                                                                                                                                                                                                                                                                                                                                                                                                                                                                                                                                                                                                                                                                                                                                                                                                                                                                       |
|-----------------|-------------------------------------------------------------------------------------------------------------------------------------------------------------------------------------------------------------------------------------------------------------------------------------------------------------------------------------------------------------------------------------------------------------------------------------------------------------------------------------------------------------------------------------------------------------------------------------------------------------------------------------------------------------------------------------------------------------------------------------------------------------------------------------------------------------------------------------------------------------------------------------------------------------------------------------------------------------------------------------------------------------------------------------------------------------------------------------------------------------------------------------------------------------------------------------------------------------------------------------------------------------------------------------------------------------------------------------------------------------------------------------------------------------------------------------------------------------------------------------------------------------------------------------------------------------------------------------------------------------------------------------------------------------------------------------------------------------------------------------------------------------------------------------------------------|
|                 | <p>33. mortality.mp.<br/> 34. exp death/<br/> 35. death.mp.<br/> 36. all cause mortality.mp.<br/> 37. exp neoplasm/<br/> 38. neoplasm*.mp.<br/> 39. cancer*.mp.<br/> 40. 1 or 2<br/> 41. 3 or 4 or 5 or 6 or 7 or 8 or 9 or 10 or 11 or 12 or 13 or 14 or 15 or 16<br/> 42. 17 or 18 or 19 or 20 or 21 or 22 or 23 or 24 or 25 or 26 or 27 or 28 or 29 or 30 or 31 or 32 or 33 or 34 or 35 or 36 or 37 or 38 or 39<br/> 43. 40 and 41 and 42<br/> 44. (random\$ or placebo\$ or single blind\$ or double blind\$ or triple blind\$).ti,ab.<br/> 45. RETRACTED ARTICLE/<br/> 46. or/44-45<br/> 47. (animal\$ not human\$).sh,hw.<br/> 48. (book or conference paper or editorial or letter or review).pt. not exp randomized controlled trial/<br/> 49. (random sampl\$ or random digit\$ or random effect\$ or random survey or random regression).ti,ab. not exp randomized controlled trial/<br/> 50. 46 not (47 or 48 or 49)<br/> 51. exp review/<br/> 52. (literature adj3 review\$).ti,ab.<br/> 53. exp meta analysis/<br/> 54. exp "Systematic Review"/<br/> 55. or/51-54<br/> 56. (medline or medlars or embase or pubmed or cinahl or amed or psychlit or psyclit or psychinfo or psycinfo or scisearch or cochrane).ti,ab.<br/> 57. RETRACTED ARTICLE/<br/> 58. 56 or 57<br/> 59. 55 and 58<br/> 60. (systematic\$ adj2 (review\$ or overview)).ti,ab.<br/> 61. (meta?anal\$ or meta anal\$ or meta-anal\$ or metaanal\$ or metanal\$).ti,ab.<br/> 62. 59 or 60 or 61<br/> 63. 43 and 50<br/> 64. 43 and 62<br/> 65. 63 or 64<br/> 66. limit 65 to (embryo &lt;first trimester&gt; or infant &lt;to one year&gt; or child &lt;unspecified age&gt; or preschool child &lt;1 to 6 years&gt; or school child &lt;7 to 12 years&gt; or adolescent &lt;13 to 17 years&gt;)<br/> 67. 65 not 66</p> |
| <b>COCHRANE</b> | 1. supplement*.mp. [mp=ti, ot, ab, sh, hw, kw, tx, ct]                                                                                                                                                                                                                                                                                                                                                                                                                                                                                                                                                                                                                                                                                                                                                                                                                                                                                                                                                                                                                                                                                                                                                                                                                                                                                                                                                                                                                                                                                                                                                                                                                                                                                                                                                |

## ONLINE SUPPORTING MATERIAL

|  |                                                                                                                                                                                                                                                                                                                                                                                                                                                                                                                                                                                                                                                                                                                                                                                                                                                                                                                                                                                                                                                                                                                                                                                                                                                                                                                                                                                                                                                                                                                                                                                                                                                                                                                                                                                                                                                                                                                                                                                                                                                                                                                                                                                                                                                                                                                                                                                                                                                                                                                                                                             |
|--|-----------------------------------------------------------------------------------------------------------------------------------------------------------------------------------------------------------------------------------------------------------------------------------------------------------------------------------------------------------------------------------------------------------------------------------------------------------------------------------------------------------------------------------------------------------------------------------------------------------------------------------------------------------------------------------------------------------------------------------------------------------------------------------------------------------------------------------------------------------------------------------------------------------------------------------------------------------------------------------------------------------------------------------------------------------------------------------------------------------------------------------------------------------------------------------------------------------------------------------------------------------------------------------------------------------------------------------------------------------------------------------------------------------------------------------------------------------------------------------------------------------------------------------------------------------------------------------------------------------------------------------------------------------------------------------------------------------------------------------------------------------------------------------------------------------------------------------------------------------------------------------------------------------------------------------------------------------------------------------------------------------------------------------------------------------------------------------------------------------------------------------------------------------------------------------------------------------------------------------------------------------------------------------------------------------------------------------------------------------------------------------------------------------------------------------------------------------------------------------------------------------------------------------------------------------------------------|
|  | <p>2. antioxidant*.mp. [mp=ti, ot, ab, sh, hw, kw, tx, ct]</p> <p>3. vitamin A.mp. [mp=ti, ot, ab, sh, hw, kw, tx, ct]</p> <p>4. retinol.mp. [mp=ti, ot, ab, sh, hw, kw, tx, ct]</p> <p>5. vitamin C.mp. [mp=ti, ot, ab, sh, hw, kw, tx, ct]</p> <p>6. ascorbic acid.mp. [mp=ti, ot, ab, sh, hw, kw, tx, ct]</p> <p>7. vitamin E.mp. [mp=ti, ot, ab, sh, hw, kw, tx, ct]</p> <p>8. alpha tocopherol.mp. [mp=ti, ot, ab, sh, hw, kw, tx, ct]</p> <p>9. beta carotene.mp. [mp=ti, ot, ab, sh, hw, kw, tx, ct]</p> <p>10. alpha carotene.mp. [mp=ti, ot, ab, sh, hw, kw, tx, ct]</p> <p>11. selenium.mp. [mp=ti, ot, ab, sh, hw, kw, tx, ct]</p> <p>12. zinc.mp. [mp=ti, ot, ab, sh, hw, kw, tx, ct]</p> <p>13. copper.mp. [mp=ti, ot, ab, sh, hw, kw, tx, ct]</p> <p>14. cardiovascular disease*.mp. [mp=ti, ot, ab, sh, hw, kw, tx, ct]</p> <p>15. coronary heart disease*.mp. [mp=ti, ot, ab, sh, hw, kw, tx, ct]</p> <p>16. coronary artery disease*.mp. [mp=ti, ot, ab, sh, hw, kw, tx, ct]</p> <p>17. coronary disease*.mp. [mp=ti, ot, ab, sh, hw, kw, tx, ct]</p> <p>18. acute coronary syndrome*.mp. [mp=ti, ot, ab, sh, hw, kw, tx, ct]</p> <p>19. ischemic heart disease*.mp. [mp=ti, ot, ab, sh, hw, kw, tx, ct]</p> <p>20. myocardial ischemia*.mp. [mp=ti, ot, ab, sh, hw, kw, tx, ct]</p> <p>21. heart infarction*.mp. [mp=ti, ot, ab, sh, hw, kw, tx, ct]</p> <p>22. acute heart infarction*.mp. [mp=ti, ot, ab, sh, hw, kw, tx, ct]</p> <p>23. myocardial infarction*.mp. [mp=ti, ot, ab, sh, hw, kw, tx, ct]</p> <p>24. stroke*.mp. [mp=ti, ot, ab, sh, hw, kw, tx, ct]</p> <p>25. cerebrovascular*.mp. [mp=ti, ot, ab, sh, hw, kw, tx, ct]</p> <p>26. cardiovascular mortality.mp. [mp=ti, ot, ab, sh, hw, kw, tx, ct]</p> <p>27. cardiovascular death.mp. [mp=ti, ot, ab, sh, hw, kw, tx, ct]</p> <p>28. mortality.mp. [mp=ti, ot, ab, sh, hw, kw, tx, ct]</p> <p>29. death.mp. [mp=ti, ot, ab, sh, hw, kw, tx, ct]</p> <p>30. all cause mortality.mp. [mp=ti, ot, ab, sh, hw, kw, tx, ct]</p> <p>31. cancer*.mp. [mp=ti, ot, ab, sh, hw, kw, tx, ct]</p> <p>32. neoplasm*.mp. [mp=ti, ot, ab, sh, hw, kw, tx, ct]</p> <p>33. 2 or 3 or 4 or 5 or 6 or 7 or 8 or 9 or 10 or 11 or 12 or 13</p> <p>34. 14 or 15 or 16 or 17 or 18 or 19 or 20 or 21 or 22 or 23 or 24 or 25 or 26 or 27 or 28 or 29 or 30 or 31 or 32</p> <p>35. 1 and 33 and 34</p> <p>36. limit 35 to (cochrane childhood cancer group or cochrane neonatal group or "cochrane pregnancy and childbirth group") [Limit not valid in CDSR; records were retained]</p> <p>37. 35 not 36</p> |
|--|-----------------------------------------------------------------------------------------------------------------------------------------------------------------------------------------------------------------------------------------------------------------------------------------------------------------------------------------------------------------------------------------------------------------------------------------------------------------------------------------------------------------------------------------------------------------------------------------------------------------------------------------------------------------------------------------------------------------------------------------------------------------------------------------------------------------------------------------------------------------------------------------------------------------------------------------------------------------------------------------------------------------------------------------------------------------------------------------------------------------------------------------------------------------------------------------------------------------------------------------------------------------------------------------------------------------------------------------------------------------------------------------------------------------------------------------------------------------------------------------------------------------------------------------------------------------------------------------------------------------------------------------------------------------------------------------------------------------------------------------------------------------------------------------------------------------------------------------------------------------------------------------------------------------------------------------------------------------------------------------------------------------------------------------------------------------------------------------------------------------------------------------------------------------------------------------------------------------------------------------------------------------------------------------------------------------------------------------------------------------------------------------------------------------------------------------------------------------------------------------------------------------------------------------------------------------------------|

ONLINE SUPPORTING MATERIAL

Supplementary Table 2. NNT/NNH calculations  
 (Method A);  $NNT = 1/ARR$ , where  $ARR = CER \cdot RRR$ ;  $RRR = 1 - RR$   
 (Method B);  $NNT = 1/ARR$ , where  $ARR = CER - EER$

| <b>METHOD A (<math>NNT = 1/ARR</math>, where <math>ARR = CER \cdot RRR</math>; <math>RRR = 1 - RR</math>)</b> |              |            |           |            |            |            |
|---------------------------------------------------------------------------------------------------------------|--------------|------------|-----------|------------|------------|------------|
| <b>Antioxidants and CVD mortality (Studies with Selenium)</b>                                                 |              |            |           |            |            |            |
| <b>Control</b>                                                                                                |              |            |           |            |            |            |
| <b>Events</b>                                                                                                 | <b>Total</b> | <b>CER</b> | <b>RR</b> | <b>RRR</b> | <b>ARR</b> | <b>NNT</b> |
| 176                                                                                                           | 10691        | 0.0164624  | 0.77      | 0.23       | 0.0037863  | 264        |
| <b>Antioxidants and all-cause mortality (Studies with Selenium)</b>                                           |              |            |           |            |            |            |
| <b>Control</b>                                                                                                |              |            |           |            |            |            |
| <b>Events</b>                                                                                                 | <b>Total</b> | <b>CER</b> | <b>RR</b> | <b>RRR</b> | <b>ARR</b> | <b>NNT</b> |
| 930                                                                                                           | 21016        | 0.0442519  | 0.9       | 0.1        | 0.0044251  | 226        |
| <b>Antioxidants and all-cause mortality (Studies without Selenium)</b>                                        |              |            |           |            |            |            |
| <b>Control</b>                                                                                                |              |            |           |            |            |            |
| <b>Events</b>                                                                                                 | <b>Total</b> | <b>CER</b> | <b>RR</b> | <b>RRR</b> | <b>ARR</b> | <b>NNH</b> |
| 3498                                                                                                          | 36067        | 0.0969861  | 1.09      | -0.09      | -0.0087287 | 115        |
| <b>Antioxidants and Stroke mortality (Studies with Retinol)</b>                                               |              |            |           |            |            |            |
| <b>Control</b>                                                                                                |              |            |           |            |            |            |
| <b>Events</b>                                                                                                 | <b>Total</b> | <b>CER</b> | <b>RR</b> | <b>RRR</b> | <b>ARR</b> | <b>NNT</b> |
| 77                                                                                                            | 3548         | 0.0217023  | 0.71      | 0.29       | 0.0062936  | 159        |
| <b>Antioxidants and Cancer mortality (Studies with Retinol)</b>                                               |              |            |           |            |            |            |
| <b>Control</b>                                                                                                |              |            |           |            |            |            |
| <b>Events</b>                                                                                                 | <b>Total</b> | <b>CER</b> | <b>RR</b> | <b>RRR</b> | <b>ARR</b> | <b>NNT</b> |
| 107                                                                                                           | 3548         | 0.0301578  | 0.75      | 0.25       | 0.0075394  | 133        |
| <b>Antioxidants and all-cause mortality (Studies without Retinol)</b>                                         |              |            |           |            |            |            |
| <b>Control</b>                                                                                                |              |            |           |            |            |            |
| <b>Events</b>                                                                                                 | <b>Total</b> | <b>CER</b> | <b>RR</b> | <b>RRR</b> | <b>ARR</b> | <b>NNH</b> |
| 3724                                                                                                          | 44641        | 0.083421   | 1.04      | -0.04      | -0.0033368 | 300        |
| <b>Antioxidants and stroke mortality (Studies with Zinc)</b>                                                  |              |            |           |            |            |            |
| <b>Control</b>                                                                                                |              |            |           |            |            |            |
| <b>Events</b>                                                                                                 | <b>Total</b> | <b>CER</b> | <b>RR</b> | <b>RRR</b> | <b>ARR</b> | <b>NNT</b> |
| 77                                                                                                            | 3548         | 0.0217023  | 0.71      | 0.29       | 0.0062936  | 159        |
| <b>Antioxidants and all-cause mortality (Studies without Zinc)</b>                                            |              |            |           |            |            |            |

ONLINE SUPPORTING MATERIAL

|                                                                        |              |                |              |            |            |            |            |
|------------------------------------------------------------------------|--------------|----------------|--------------|------------|------------|------------|------------|
| <b>Control</b>                                                         |              |                |              |            |            |            |            |
| <b>Events</b>                                                          | <b>Total</b> | <b>CER</b>     | <b>RR</b>    | <b>RRR</b> | <b>ARR</b> | <b>NNH</b> |            |
| 3742                                                                   | 44371        | 0.0843343      | 1.07         | -0.07      | -0.0059034 | 169        |            |
| <b>Method B (NNT = 1/ARR, where ARR = CER – EER)</b>                   |              |                |              |            |            |            |            |
| <b>Antioxidants and CVD mortality (Studies with Selenium)</b>          |              |                |              |            |            |            |            |
| <b>Antioxidants</b>                                                    |              | <b>Control</b> |              |            |            |            |            |
| <b>Events</b>                                                          | <b>Total</b> | <b>Events</b>  | <b>Total</b> | <b>EER</b> | <b>CER</b> | <b>ARR</b> | <b>NNT</b> |
| 136                                                                    | 10694        | 176            | 10691        | 0.0127174  | 0.0164624  | 0.003745   | 267        |
| <b>Antioxidants and all-cause mortality (Studies with Selenium)</b>    |              |                |              |            |            |            |            |
| <b>Antioxidants</b>                                                    |              | <b>Control</b> |              |            |            |            |            |
| <b>Events</b>                                                          | <b>Total</b> | <b>Events</b>  | <b>Total</b> | <b>EER</b> | <b>CER</b> | <b>ARR</b> | <b>NNT</b> |
| 948                                                                    | 21445        | 930            | 21016        | 0.0442061  | 0.0442519  | 0.0000458  | 21834      |
| <b>Antioxidants and all-cause mortality (Studies without Selenium)</b> |              |                |              |            |            |            |            |
| <b>Antioxidants</b>                                                    |              | <b>Control</b> |              |            |            |            |            |
| <b>Events</b>                                                          | <b>Total</b> | <b>Events</b>  | <b>Total</b> | <b>EER</b> | <b>CER</b> | <b>ARR</b> | <b>NNH</b> |
| 4218                                                                   | 39678        | 3498           | 36067        | 0.1063057  | 0.0969861  | -0.0093196 | 107        |
| <b>Antioxidants and stroke mortality (Studies with Retinol)</b>        |              |                |              |            |            |            |            |
| <b>Antioxidants</b>                                                    |              | <b>Control</b> |              |            |            |            |            |
| <b>Events</b>                                                          | <b>Total</b> | <b>Events</b>  | <b>Total</b> | <b>EER</b> | <b>CER</b> | <b>ARR</b> | <b>NNT</b> |
| 55                                                                     | 3570         | 77             | 3548         | 0.0154061  | 0.0217023  | 0.0062962  | 159        |
| <b>Antioxidants and cancer mortality (Studies with Retinol)</b>        |              |                |              |            |            |            |            |
| <b>Antioxidants</b>                                                    |              | <b>Control</b> |              |            |            |            |            |
| <b>Events</b>                                                          | <b>Total</b> | <b>Events</b>  | <b>Total</b> | <b>EER</b> | <b>CER</b> | <b>ARR</b> | <b>NNT</b> |
| 81                                                                     | 3570         | 107            | 3548         | 0.022689   | 0.0301578  | 0.0074688  | 134        |
| <b>Antioxidants and all-cause mortality (Studies without Retinol)</b>  |              |                |              |            |            |            |            |
| <b>Antioxidants</b>                                                    |              | <b>Control</b> |              |            |            |            |            |
| <b>Events</b>                                                          | <b>Total</b> | <b>Events</b>  | <b>Total</b> | <b>EER</b> | <b>CER</b> | <b>ARR</b> | <b>NNH</b> |
| 4372                                                                   | 48133        | 3724           | 44641        | 0.0908316  | 0.083421   | -0.0074106 | 135        |
| <b>Antioxidants and stroke mortality (Studies with Zinc)</b>           |              |                |              |            |            |            |            |
| <b>Antioxidants</b>                                                    |              | <b>Control</b> |              |            |            |            |            |
| <b>Events</b>                                                          | <b>Total</b> | <b>Events</b>  | <b>Total</b> | <b>EER</b> | <b>CER</b> | <b>ARR</b> | <b>NNT</b> |
| 55                                                                     | 3570         | 77             | 3548         | 0.0154061  | 0.0215686  | 0.0061625  | 162        |

**ONLINE SUPPORTING MATERIAL**

|                                                                    |              |                |              |                  |                  |                  |            |
|--------------------------------------------------------------------|--------------|----------------|--------------|------------------|------------------|------------------|------------|
|                                                                    |              |                |              |                  |                  |                  |            |
| <b>Antioxidants and all-cause mortality (Studies without Zinc)</b> |              |                |              |                  |                  |                  |            |
| <b>Antioxidants</b>                                                |              | <b>Control</b> |              |                  |                  |                  |            |
| <b>Events</b>                                                      | <b>Total</b> | <b>Events</b>  | <b>Total</b> | <b>EER</b>       | <b>CER</b>       | <b>ARR</b>       | <b>NNH</b> |
| <b>4409</b>                                                        | <b>48002</b> | <b>3742</b>    | <b>44371</b> | <b>0.0918503</b> | <b>0.0843343</b> | <b>-0.007516</b> | <b>133</b> |

ARR, absolute risk reduction; CER, control event rate; EER, experimental event rate; CVD, cardiovascular disease; NNH, number needed to harm; NNT, number needed to treat; RR, relative risk; RRR, relative risk reduction.

ONLINE SUPPORTING MATERIAL

Supplementary Table 3. Characteristics of included RCT studies for CVD, CVD outcomes, cancer, cancer mortality, and all-cause mortality

| Study (reference)                     | Country | Health status                                                       | Age (years) | Duration (mean, median or range) | Supplement intake assessment | Supplement exposure (median or range, units)                                                           | Participants (intervention /control) | Incident cases (intervention /control) | Outcome             | Funding source  |
|---------------------------------------|---------|---------------------------------------------------------------------|-------------|----------------------------------|------------------------------|--------------------------------------------------------------------------------------------------------|--------------------------------------|----------------------------------------|---------------------|-----------------|
| <b>ANTIOXIDANTS ONLY</b>              |         |                                                                     |             |                                  |                              |                                                                                                        |                                      |                                        |                     |                 |
| McKeown-Eyssen et al., 1988(1)        | Canada  | History of polyp                                                    | 58          | 2 years                          | Urine sample                 | Vitamin C – 400 mg<br>Vitamin E – 400 mg                                                               | 96/89                                | 4/3                                    | All-cause mortality | Industry        |
| DeCosse et al., 1989(2)               | USA     | Familial Adenomatous Polyposis                                      | 35          | 4 years                          | Interview, urine sample      | Vitamin C – 4 g<br>Vitamin E – 400 mg                                                                  | 36/22                                | 0/1                                    | Total CVD           | Agency-industry |
|                                       |         |                                                                     |             |                                  |                              |                                                                                                        | 36/22                                | 0/1                                    | Stroke              |                 |
| Blot et al., 1993 – Linxian Trial (3) | China   | Healthy                                                             | 40 – 69     | 5 years                          | Pill count                   | Retinol – 5000 IU<br>Vitamin E – 30 mg<br>Beta-Carotene – 15 mg<br>Selenium – 50 mcg<br>Zinc – 22.5 mg | 3570/3548                            | 55/77                                  | Stroke mortality    | Agency-Industry |
|                                       |         |                                                                     |             |                                  |                              |                                                                                                        | 3570/3548                            | 81/107                                 | Cancer mortality    |                 |
|                                       |         |                                                                     |             |                                  |                              |                                                                                                        | 3570/3548                            | 250/280                                | All-cause mortality |                 |
| Omenn et al., 1996 – CARET(4)         | USA     | Smoked cigarettes or who have had occupational exposure to asbestos | 45 – 74     | 4 years                          | Pill count                   | Retinol – 25 000 IU<br>Beta-Carotene – 30 mg                                                           | 9420/8894                            | 544/424                                | All-cause mortality | Agency-industry |
| Girodon et                            | France  | Institution                                                         | 65 –        | 2 years                          | Pill count,                  | Vitamin C –                                                                                            | 61/20                                | 18/7                                   | All-cause           | Industry        |

**ONLINE SUPPORTING MATERIAL**

| Study (reference)                     | Country  | Health status                                | Age (years) | Duration (mean, median or range) | Supplement intake assessment | Supplement exposure (median or range, units)                                                                                 | Participants (intervention /control) | Incident cases (intervention /control) | Outcome             | Funding source  |
|---------------------------------------|----------|----------------------------------------------|-------------|----------------------------------|------------------------------|------------------------------------------------------------------------------------------------------------------------------|--------------------------------------|----------------------------------------|---------------------|-----------------|
| al., 1997(5)                          |          | alized                                       | 102         |                                  | plasma conc.                 | 120 mg<br>Vitamin E –<br>15 mg<br>Beta-<br>carotene – 6<br>mg<br>Selenium –<br>100 mcg<br>Zinc – 20 mg                       |                                      |                                        | mortality           |                 |
| Tardif et al., 1997 - MVP(6)          | Canada   | Scheduled angioplasty                        | 58.5        | 7 months                         | Pill count, plasma conc.     | Vitamin C – 500 mg<br>Vitamin E – 700 IU<br>Beta-Carotene – 30 000 IU                                                        | 158/159                              | 4/3                                    | Total CVD           | Agency-industry |
|                                       |          |                                              |             |                                  |                              |                                                                                                                              | 158/159                              | 4/3                                    | Total CHD           |                 |
|                                       |          |                                              |             |                                  |                              |                                                                                                                              | 158/159                              | 3/2                                    | MI                  |                 |
|                                       |          |                                              |             |                                  |                              |                                                                                                                              | 158/159                              | 1/1                                    | CVD mortality       |                 |
|                                       |          |                                              |             |                                  |                              |                                                                                                                              | 158/159                              | 1/1                                    | CHD mortality       |                 |
| 158/159                               | 1/1      | All-cause mortality                          |             |                                  |                              |                                                                                                                              |                                      |                                        |                     |                 |
| Girodon et al., 1999 – MINVITOA X (7) | France   | Long-term institutionalized elderly patients | 65 – 103    | 2 years                          | Pill count, plasma conc.     | Vitamin C– 120 mg<br>Vitamin E– 15 mg<br>Beta-Carotene – 6 mg (1000 RE)<br>Selenium Sulfide – 100 ug<br>Zinc Sulfate – 20 mg | 543/182                              | 155/51                                 | All-cause mortality | Agency-industry |
| Correa et al., 2000                   | Colombia | History of precancer                         | 29 – 69     | 6 years                          | Pill count, plasma           | Vitamin C – 2 g                                                                                                              | 255/237                              | 6/2                                    | All-cause mortality | Agency-Industry |



**ONLINE SUPPORTING MATERIAL**

| <b>Study (reference)</b>        | <b>Country</b> | <b>Health status</b>                          | <b>Age (years)</b> | <b>Duration (mean, median or range)</b> | <b>Supplement intake assessment</b> | <b>Supplement exposure (median or range, units)</b>                               | <b>Participants (intervention /control)</b> | <b>Incident cases (intervention /control)</b> | <b>Outcome</b>      | <b>Funding source</b> |
|---------------------------------|----------------|-----------------------------------------------|--------------------|-----------------------------------------|-------------------------------------|-----------------------------------------------------------------------------------|---------------------------------------------|-----------------------------------------------|---------------------|-----------------------|
| (8)                             |                | ous lesion                                    |                    |                                         | conc., interview                    | Beta-carotene – 30 mg                                                             |                                             |                                               |                     |                       |
| Jacobson et al., 2000(9)        | USA            | Smokers                                       | > 18               | 6 months                                | n/a                                 | Vitamin C – 250 mg<br>Vitamin E – 200 IU<br>Beta-Carotene – 6mg                   | 57/55                                       | 0/1                                           | All-cause mortality | Agency-Industry       |
| Leppala et al., 2000 - ATBC(10) | Finland        | Smokers                                       | 50 – 69            | 6.1 years                               | Pill count, plasma conc.            | Vitamin E – 50 mg<br>Beta-Carotene – 20 mg                                        | 7118/7153                                   | 258/252                                       | Stroke              | Agency                |
|                                 |                |                                               |                    |                                         |                                     |                                                                                   | 7118/7153                                   | 46/34                                         | Stroke mortality    |                       |
| Salonen et al., 2000 – ASAP(11) | Denmark        | Hypercholesterolemia                          | 45 – 69            | 3 years                                 | Pill count                          | Vitamin C – 250 mg (136 IU)<br>Vitamin E – 91 mg (136 IU)                         | 130/130                                     | 1/1                                           | Total CVD           | Agency-industry       |
|                                 |                |                                               |                    |                                         |                                     |                                                                                   | 130/130                                     | 1/1                                           | CVD mortality       |                       |
|                                 |                |                                               |                    |                                         |                                     |                                                                                   | 130/130                                     | 1/1                                           | All-cause mortality |                       |
| AREDS 2001(12)                  | USA            | Advanced Acute Degeneration (AMD)             | 55 – 80            | 6.3 years                               | Pill count, plasma conc.            | Vitamin C – 500 mg<br>Vitamin E – 400 IU<br>Beta-Carotene – 15 mg<br>Zinc – 80 mg | 2370/2387                                   | 251/240                                       | All-cause mortality | Agency-industry       |
| Brown et al., 2001 – HATS (13)  | USA            | Previous CHD (with clinical coronary disease) | 53                 | 3 years                                 | Pill count                          | Vitamin C – 1000 mg<br>Vitamin E – 800 IU<br>Beta-                                | 84/76                                       | 6/8                                           | Total CVD           | Agency-industry       |
|                                 |                |                                               |                    |                                         |                                     |                                                                                   | 84/76                                       | 4/5                                           | MI                  |                       |
|                                 |                |                                               |                    |                                         |                                     |                                                                                   | 84/76                                       | 2/2                                           | Stroke              |                       |
|                                 |                |                                               |                    |                                         |                                     |                                                                                   | 84/76                                       | 1/1                                           | CVD mortality       |                       |

**ONLINE SUPPORTING MATERIAL**

| Study (reference)                | Country        | Health status                                                       | Age (years) | Duration (mean, median or range) | Supplement intake assessment | Supplement exposure (median or range, units)                   | Participants (intervention /control) | Incident cases (intervention /control) | Outcome             | Funding source  |
|----------------------------------|----------------|---------------------------------------------------------------------|-------------|----------------------------------|------------------------------|----------------------------------------------------------------|--------------------------------------|----------------------------------------|---------------------|-----------------|
|                                  |                | defined as previous MI, coronary interventions or confirmed angina) |             |                                  |                              | Carotene – 25 mg<br>Selenium – 100 mcg<br>Simvastatin – Niacin | 84/76                                | 1/1                                    | All-cause mortality |                 |
| Chylack et al., 2002 – REACT(14) | UK and USA     | Cataract                                                            | 67.8        | 3 years                          | Plasma conc.                 | Vitamin C – 750 mg                                             | 149/148                              | 2/1                                    | CVD mortality       | Agency-industry |
|                                  |                |                                                                     |             |                                  |                              | Vitamin E – 600 mg                                             | 149/148                              | 2/1                                    | CHD mortality       |                 |
|                                  |                |                                                                     |             |                                  |                              | Beta-Carotene – 18 mg                                          | 149/148                              | 2/1                                    | MI mortality        |                 |
|                                  |                |                                                                     |             |                                  |                              |                                                                | 149/148                              | 3/2                                    | Cancer mortality    |                 |
|                                  |                |                                                                     |             |                                  |                              |                                                                | 149/148                              | 3/9                                    | All-cause mortality |                 |
| HPS Collaborative Group 2002(15) | UK             | Previous CHD                                                        | 40 – 80     | 5 years                          | Capsule count                | Vitamin C – 250 mg                                             | 10269/10267                          | 2306/2312                              | Total CVD           | Agency-industry |
|                                  |                |                                                                     |             |                                  |                              | Vitamin E – 600 mg                                             | 10269/10267                          | 1063/1047                              | Total CHD           |                 |
|                                  |                |                                                                     |             |                                  |                              | Beta-Carotene – 20 mg                                          | 10269/10267                          | 464/467                                | MI                  |                 |
|                                  |                |                                                                     |             |                                  |                              |                                                                | 10269/10267                          | 511/518                                | Stroke              |                 |
|                                  |                |                                                                     |             |                                  |                              |                                                                | 10269/10267                          | 878/840                                | CVD mortality       |                 |
|                                  |                |                                                                     |             |                                  |                              |                                                                | 10269/10267                          | 664/630                                | CHD mortality       |                 |
|                                  |                |                                                                     |             |                                  |                              |                                                                | 10269/10267                          | 108/107                                | Stroke mortality    |                 |
|                                  |                |                                                                     |             |                                  |                              |                                                                | 10269/10267                          | 1446/1389                              | All-cause mortality |                 |
| Waters et al., 2002 – WAVE(16)   | USA and Canada | Coronary Stenosis                                                   | 65 ± 9      | 3 years                          | Capsule count                | Vitamin C – 500 mg                                             | 212/211                              | 26/18                                  | Total CVD           | Agency          |
|                                  |                |                                                                     |             |                                  |                              | Vitamin E – 400 IU                                             | 212/211                              | 14/8                                   | Total CHD           |                 |
|                                  |                |                                                                     |             |                                  |                              |                                                                | 212/211                              | 4/4                                    | MI                  |                 |
|                                  |                |                                                                     |             |                                  |                              |                                                                | 212/211                              | 6/7                                    | Stroke              |                 |

**ONLINE SUPPORTING MATERIAL**

| Study (reference)                | Country | Health status | Age (year s) | Duration (mean, median or range)                   | Supplement intake assessment | Supplement exposure (median or range, units) | Participants (intervention /control) | Incident cases (intervention /control) | Outcome             | Funding source  |
|----------------------------------|---------|---------------|--------------|----------------------------------------------------|------------------------------|----------------------------------------------|--------------------------------------|----------------------------------------|---------------------|-----------------|
|                                  |         |               |              |                                                    |                              |                                              | 212/211                              | 10/4                                   | CVD mortality       |                 |
|                                  |         |               |              |                                                    |                              |                                              | 212/211                              | 6/5                                    | Total cancer        |                 |
|                                  |         |               |              |                                                    |                              |                                              | 212/211                              | 16/6                                   | All-cause mortality |                 |
| Virtamo et al., 2003 – ATBC(17)  | Finland | Smokers       | 50 – 69      | 6.1 years                                          | Pill count, plasma conc.     | Vitamin E – 50 mg<br>Beta-Carotene – 20 mg   | 7278/7287                            | 579/551                                | Total cancer        | Agency          |
|                                  |         |               |              |                                                    |                              |                                              | 7278/7287                            | 932/851                                | All-cause mortality |                 |
| Tornwall et al., 2004 – ATBC(18) | Finland | Smokers       | 50 – 69      | 6.1 years                                          | Pill count, plasma conc.     | Vitamin E – 50 mg<br>Beta-Carotene – 20 mg   | 6781/6849                            | 511/534                                | Total CHD           | Agency          |
|                                  |         |               |              |                                                    |                              |                                              | 497/438                              | 123/93                                 |                     |                 |
|                                  |         |               |              |                                                    |                              |                                              | 6781/6849                            | 289/296                                | MI                  |                 |
|                                  |         |               |              |                                                    |                              |                                              | 497/438                              | 58/54                                  |                     |                 |
|                                  |         |               |              |                                                    |                              |                                              | 6781/6849                            | 222/238                                | CHD mortality       |                 |
|                                  |         |               |              |                                                    |                              |                                              | 497/438                              | 65/39                                  |                     |                 |
| Mooney et al., 2005(19)          | USA     | Smokers       | 31.2 – 41.1  | 2 years (Data is presented on 15-month follow-up?) | Pill count, plasma conc.     | Vitamin C – 500 mg<br>Vitamin E – 400 IU     | 142/142                              | 1/0                                    | Total CVD           | Agency-industry |
|                                  |         |               |              |                                                    |                              |                                              | 142/142                              | 1/0                                    | Total CHD           |                 |
|                                  |         |               |              |                                                    |                              |                                              | 142/142                              | 1/0                                    | MI                  |                 |
|                                  |         |               |              |                                                    |                              |                                              | 142/142                              | 1/0                                    | CVD mortality       |                 |
|                                  |         |               |              |                                                    |                              |                                              | 142/142                              | 1/0                                    | CHD mortality       |                 |
|                                  |         |               |              |                                                    |                              |                                              | 142/142                              | 1/0                                    | MI mortality        |                 |
|                                  |         |               |              |                                                    |                              |                                              | 142/142                              | 1/1                                    | Total cancer        |                 |
|                                  |         |               |              |                                                    |                              |                                              | 142/142                              | 1/0                                    | All-cause mortality |                 |
| Stone et                         | USA     | Previous      | < 85         | 1 year                                             | Pill count                   | Vitamin C –                                  | 101/96                               | 7/8                                    | Total CVD           | Agency-         |

**ONLINE SUPPORTING MATERIAL**

| <b>Study (reference)</b> | <b>Country</b> | <b>Health status</b>                | <b>Age (years)</b>                    | <b>Duration (mean, median or range)</b>                                                                                                          | <b>Supplement intake assessment</b> | <b>Supplement exposure (median or range, units)</b>               | <b>Participants (intervention /control)</b> | <b>Incident cases (intervention /control)</b> | <b>Outcome</b>      | <b>Funding source</b> |
|--------------------------|----------------|-------------------------------------|---------------------------------------|--------------------------------------------------------------------------------------------------------------------------------------------------|-------------------------------------|-------------------------------------------------------------------|---------------------------------------------|-----------------------------------------------|---------------------|-----------------------|
| al., 2005(20)            |                | CHD                                 |                                       |                                                                                                                                                  |                                     | 1000 mg/day<br>Vitamin E –<br>800 mg/day                          | 101/96                                      | 3/1                                           | MI                  | industry              |
|                          |                |                                     |                                       |                                                                                                                                                  |                                     |                                                                   | 101/96                                      | 0/1                                           | Stroke              |                       |
|                          |                |                                     |                                       |                                                                                                                                                  |                                     |                                                                   | 101/96                                      | 0/1                                           | CVD mortality       |                       |
|                          |                |                                     |                                       |                                                                                                                                                  |                                     |                                                                   | 101/96                                      | 0/1                                           | All-cause mortality |                       |
| Bairati et al., 2006(21) | Canada         | Stage I and II head and neck cancer | Not specifies for this specific group | 3 years, however, beta-carotene supplementation stopped after first 156 enrolled. Duration period of beta-carotene supplementation not specified | Pill count                          | Vitamin E – 400 IU<br>Beta-Carotene – 30 mg                       | 79/77                                       | 37/30                                         | All-cause mortality | Agency-industry       |
| CLIPS 2007(22)           | Europe         | Pulmonary Artery Disease            | 66                                    | 2 years                                                                                                                                          | Capsule count, interview            | Vitamin C – 250 mg<br>Vitamin E – 600 mg<br>Beta-Carotene – 20 mg | 185/181                                     | 16/11                                         | Total CVD           | Agency-Industry       |
|                          |                |                                     |                                       |                                                                                                                                                  |                                     |                                                                   | 185/181                                     | 9/4                                           | MI                  |                       |
|                          |                |                                     |                                       |                                                                                                                                                  |                                     |                                                                   | 185/181                                     | 6/5                                           | Stroke              |                       |
|                          |                |                                     |                                       |                                                                                                                                                  |                                     |                                                                   | 185/181                                     | 6/3                                           | CVD mortality       |                       |
|                          |                |                                     |                                       |                                                                                                                                                  |                                     |                                                                   | 185/181                                     | 2/2                                           | MI mortality        |                       |
|                          |                |                                     |                                       |                                                                                                                                                  |                                     |                                                                   | 185/181                                     | 3/0                                           | Stroke mortality    |                       |
|                          |                |                                     |                                       |                                                                                                                                                  |                                     |                                                                   | 185/181                                     | 1/1                                           | Cancer              |                       |

**ONLINE SUPPORTING MATERIAL**

| <b>Study (reference)</b>          | <b>Country</b>               | <b>Health status</b>                                                      | <b>Age (year s)</b> | <b>Duration (mean, median or range)</b> | <b>Supplement intake assessment</b> | <b>Supplement exposure (median or range, units)</b>                                                   | <b>Participants (intervention /control)</b> | <b>Incident cases (intervention /control)</b> | <b>Outcome</b>                   | <b>Funding source</b> |
|-----------------------------------|------------------------------|---------------------------------------------------------------------------|---------------------|-----------------------------------------|-------------------------------------|-------------------------------------------------------------------------------------------------------|---------------------------------------------|-----------------------------------------------|----------------------------------|-----------------------|
|                                   |                              |                                                                           |                     |                                         |                                     |                                                                                                       | 185/181                                     | 7/4                                           | mortality<br>All-cause mortality |                       |
| Cook et al., 2007- WACS (23)      | USA                          | History of vascular disease or at least three cardiovascular risk factors | 60.6                | 9.4 years                               | Pill count                          | Vitamin C – 500 mg<br>Vitamin E – 600 IU (every other day)<br>Beta-Carotene – 50 mg (every other day) | 4085/1022                                   | 507/124                                       | All-cause mortality              | Agency-industry       |
| Plummer et al., 2007(24)          | Venezuela                    | Pre-cancerous lesions of the stomach                                      | 35 – 69             | 3 years                                 | Pill count                          | Vitamin C – 750 mg<br>Vitamin E – 600 mg<br>Beta-Carotene – 18 mg/day                                 | 990/990                                     | 1/0                                           | Total CVD                        | Agency-industry       |
|                                   |                              |                                                                           |                     |                                         |                                     |                                                                                                       | 990/990                                     | 3/2                                           | Total cancer                     |                       |
|                                   |                              |                                                                           |                     |                                         |                                     |                                                                                                       | 990/990                                     | 16/11                                         | All-cause mortality              |                       |
| Sesso et al., 2008 – PHS II (25)  | USA                          | Physicians                                                                | 64.3 ± 9.2          | 7.6 years                               | Questionnaire                       | Vitamin C – 500 mg<br>Vitamin E – 400 IU (every other day)                                            | 3656/3653                                   | 310/316                                       | Total CVD                        | Agency-industry       |
|                                   |                              |                                                                           |                     |                                         |                                     |                                                                                                       | 3656/3653                                   | 133/144                                       | MI                               |                       |
|                                   |                              |                                                                           |                     |                                         |                                     |                                                                                                       | 3656/3653                                   | 104/113                                       | Stroke                           |                       |
|                                   |                              |                                                                           |                     |                                         |                                     |                                                                                                       | 3656/3653                                   | 127/122                                       | CVD mortality                    |                       |
| Lippman et al., 2009 – SELECT(26) | USA, Canada, and Puerto Rico | Healthy                                                                   | 62.5                | 7 years                                 | Pill count, plasma conc.            | Vitamin E – 400 IU/day<br>Selenium 200 mcg/day                                                        | 8904/8910                                   | 1041/1050                                     | Total CVD                        | Agency-industry       |
|                                   |                              |                                                                           |                     |                                         |                                     |                                                                                                       | 8904/8910                                   | 111/100                                       | Stroke                           |                       |
|                                   |                              |                                                                           |                     |                                         |                                     |                                                                                                       | 8904/8910                                   | 117/142                                       | CVD mortality                    |                       |
|                                   |                              |                                                                           |                     |                                         |                                     |                                                                                                       | 8904/8910                                   | 12/8                                          | Stroke mortality                 |                       |
|                                   |                              |                                                                           |                     |                                         |                                     |                                                                                                       | 8904/8910                                   | 846/824                                       | Total cancer                     |                       |

**ONLINE SUPPORTING MATERIAL**

| Study (reference)                   | Country | Health status                | Age (years) | Duration (mean, median or range) | Supplement intake assessment | Supplement exposure (median or range, units)                                                           | Participants (intervention /control) | Incident cases (intervention /control) | Outcome             | Funding source  |
|-------------------------------------|---------|------------------------------|-------------|----------------------------------|------------------------------|--------------------------------------------------------------------------------------------------------|--------------------------------------|----------------------------------------|---------------------|-----------------|
|                                     |         |                              |             |                                  |                              |                                                                                                        | 8904/8910                            | 117/125                                | Cancer mortality    |                 |
|                                     |         |                              |             |                                  |                              |                                                                                                        | 8904/8910                            | 359/382                                | All-cause mortality |                 |
| Herberg et al., 2010 – SUVIMAX (27) | France  | Healthy                      | 35 – 60     | 7.5 years                        | Questionnaire                | Vitamin C – 120 mg<br>Vitamin E – 30 mg<br>Beta-Carotene – 6 mg<br>Selenium – 100 mcg<br>Zinc – 20 mg  | 6377/6364                            | 137/143                                | Total CHD           | Agency-industry |
|                                     |         |                              |             |                                  |                              |                                                                                                        | 6377/6364                            | 278/300                                | Total cancer        |                 |
|                                     |         |                              |             |                                  |                              |                                                                                                        | 6377/6364                            | 77/99                                  | All-cause mortality |                 |
| Ma et al., 2012 – SIT(28)           | China   | Healthy                      | 35 – 64     | 7.3 years                        | Pill count                   | Vitamin C – 500 mg<br>Vitamin E – 200 IU<br>Beta-Carotene – 15 mg (stopped early)<br>Selenium – 75 mcg | 1706/1705                            | 18/33                                  | CVD mortality       | Agency-industry |
|                                     |         |                              |             |                                  |                              |                                                                                                        | 1706/1705                            | 10/14                                  | Stroke mortality    |                 |
|                                     |         |                              |             |                                  |                              |                                                                                                        | 1706/1705                            | 41/42                                  | Cancer mortality    |                 |
|                                     |         |                              |             |                                  |                              |                                                                                                        | 1706/1705                            | 82/101                                 | All-cause mortality |                 |
| Arruda et al., 2013(29)             | Brazil  | Sickle cell anaemia patients | 18 – 68     | 180 days                         | Pill count                   | Vitamin C – 1400 mg<br>Vitamin E – 800 mg                                                              | 46/42                                | 2/0                                    | Total CVD           | Agency-industry |
|                                     |         |                              |             |                                  |                              |                                                                                                        | 46/42                                | 2/0                                    | Stroke              |                 |
|                                     |         |                              |             |                                  |                              |                                                                                                        | 46/42                                | 0/1                                    | All-cause mortality |                 |
| Bonelli et al.,                     | Italy   | Removal of adenoid           | 29 – 83     | 5 years (or until                | interview                    | Vitamin A – 2 mg                                                                                       | 200/211                              | 1/2                                    | Total cancer        | Agency-industry |

**ONLINE SUPPORTING MATERIAL**

| Study (reference)                        | Country | Health status        | Age (years) | Duration (mean, median or range) | Supplement intake assessment       | Supplement exposure (median or range, units)                                  | Participants (intervention /control) | Incident cases (intervention /control) | Outcome                | Funding source  |
|------------------------------------------|---------|----------------------|-------------|----------------------------------|------------------------------------|-------------------------------------------------------------------------------|--------------------------------------|----------------------------------------|------------------------|-----------------|
| 2013(30)                                 |         | from large colon     |             | recurrent adenoma occurrence)    |                                    | Vitamin C – 180 mg<br>Vitamin E – 30 mg<br>Selenium – 200 mcg<br>Zinc – 30 mg | 200/211                              | 6/9                                    | All-cause mortality    |                 |
| Wang et al., 2014 – PHS II (31)          | USA     | Physicians           | 64.3 ± 9.2  | 7.6 years                        | Questionnaire                      | Vitamin C – 500 mg<br>Vitamin E – 400 IU (every other day)                    | 3656/3653                            | 504/486                                | Total cancer           | Agency-industry |
|                                          |         |                      |             |                                  |                                    |                                                                               | 3656/3653                            | 440/406                                | All-cause mortality    |                 |
| <b>SELENIUM ONLY</b>                     |         |                      |             |                                  |                                    |                                                                               |                                      |                                        |                        |                 |
| Korpela et al., 1989(32)                 | Finland | Previous MI          | 48-68       | 6 months                         | Serum selenium status              | Selenium – 100 mcg                                                            | 40/41                                | 1/6                                    | Total CVD              | Unknown         |
|                                          |         |                      |             |                                  |                                    |                                                                               | 40/41                                | 1/6                                    | Total CHD              |                 |
|                                          |         |                      |             |                                  |                                    |                                                                               | 40/41                                | 1/6                                    | MI                     |                 |
|                                          |         |                      |             |                                  |                                    |                                                                               | 40/41                                | 0/4                                    | CVD mortality          |                 |
|                                          |         |                      |             |                                  |                                    |                                                                               | 40/41                                | 0/4                                    | CHD mortality          |                 |
|                                          |         |                      |             |                                  |                                    |                                                                               | 40/41                                | 0/4                                    | MI mortality           |                 |
|                                          |         |                      |             |                                  |                                    |                                                                               | 40/41                                | 0/4                                    | All-cause mortality    |                 |
| Duffield-Lillico et al., 2002 – NPC (33) | USA     | Previous skin cancer | 18-80       | 7.4 years                        | Patient-reported and blood samples | Selenium – 200 mcg                                                            | 653/659                              | 107/139                                | Total cancer           | Agency-Industry |
|                                          |         |                      |             |                                  |                                    |                                                                               | 653/659                              | 40/66                                  | Total cancer mortality |                 |
| Limburg et                               | China   | Esophage             | 34-         | 10                               | Pill count and                     | Selenium –                                                                    | 180/180                              | 1/1                                    | Total CVD              | Agency-         |

**ONLINE SUPPORTING MATERIAL**

| <b>Study (reference)</b>           | <b>Country</b>           | <b>Health status</b>  | <b>Age (years)</b> | <b>Duration (mean, median or range)</b> | <b>Supplement intake assessment</b> | <b>Supplement exposure (median or range, units)</b> | <b>Participants (intervention /control)</b> | <b>Incident cases (intervention /control)</b> | <b>Outcome</b>         | <b>Funding source</b> |
|------------------------------------|--------------------------|-----------------------|--------------------|-----------------------------------------|-------------------------------------|-----------------------------------------------------|---------------------------------------------|-----------------------------------------------|------------------------|-----------------------|
| al., 2005 (34)                     |                          | al squamous dysplasia | 68                 | months                                  | direct observation                  | 200 mcg                                             | 180/180                                     | 1/0                                           | Total CHD              | Industry              |
|                                    |                          |                       |                    |                                         |                                     |                                                     | 180/180                                     | 1/0                                           | MI                     |                       |
|                                    |                          |                       |                    |                                         |                                     |                                                     | 180/180                                     | 0/1                                           | Stroke                 |                       |
|                                    |                          |                       |                    |                                         |                                     |                                                     | 180/180                                     | 1/0                                           | CVD mortality          |                       |
|                                    |                          |                       |                    |                                         |                                     |                                                     | 180/180                                     | 1/0                                           | CHD mortality          |                       |
|                                    |                          |                       |                    |                                         |                                     |                                                     | 180/180                                     | 1/0                                           | MI mortality           |                       |
|                                    |                          |                       |                    |                                         |                                     |                                                     | 180/180                                     | 0/1                                           | Total cancer           |                       |
|                                    |                          |                       |                    |                                         |                                     |                                                     | 180/180                                     | 1/0                                           | All-cause mortality    |                       |
| Stranges et al., 2006 – NPC (35)   | USA                      | Previous skin cancer  | 52-73              | 7.6 years                               | Patient-reported and blood samples  | Selenium – 200 mcg                                  | 504/500                                     | 103/96                                        | Total CVD              | Agency-Industry       |
|                                    |                          |                       |                    |                                         |                                     |                                                     | 504/500                                     | 63/59                                         | Total CHD              |                       |
|                                    |                          |                       |                    |                                         |                                     |                                                     | 504/500                                     | 41/43                                         | MI                     |                       |
|                                    |                          |                       |                    |                                         |                                     |                                                     | 504/500                                     | 35/32                                         | Stroke                 |                       |
|                                    |                          |                       |                    |                                         |                                     |                                                     | 504/500                                     | 40/31                                         | CVD mortality          |                       |
|                                    |                          |                       |                    |                                         |                                     |                                                     | 504/500                                     | 9/8                                           | MI mortality           |                       |
|                                    |                          |                       |                    |                                         |                                     |                                                     | 504/500                                     | 110/111                                       | All-cause mortality    |                       |
| Lippman et al., 2009 – SELECT (26) | USA, Canada, Puerto Rico | Healthy               | 62.5               | 7 years                                 | Pill count, plasma conc.            | Selenium - 200 mcg/day                              | 17760/17773                                 | 2121/2084                                     | Total CVD              | Agency-Industry       |
|                                    |                          |                       |                    |                                         |                                     |                                                     | 17760/17773                                 | 172/162                                       | Stroke                 |                       |
|                                    |                          |                       |                    |                                         |                                     |                                                     | 17760/17773                                 | 246/261                                       | CVD mortality          |                       |
|                                    |                          |                       |                    |                                         |                                     |                                                     | 17760/17773                                 | 21/17                                         | Stroke mortality       |                       |
|                                    |                          |                       |                    |                                         |                                     |                                                     | 17760/17773                                 | 1683/1680                                     | Total cancer           |                       |
|                                    |                          |                       |                    |                                         |                                     |                                                     | 17760/17773                                 | 245/231                                       | Total cancer mortality |                       |



**ONLINE SUPPORTING MATERIAL**

| <b>Study (reference)</b>              | <b>Country</b>      | <b>Health status</b>          | <b>Age (years)</b> | <b>Duration (mean, median or range)</b> | <b>Supplement intake assessment</b> | <b>Supplement exposure (median or range, units)</b> | <b>Participants (intervention /control)</b> | <b>Incident cases (intervention /control)</b> | <b>Outcome</b>      | <b>Funding source</b> |
|---------------------------------------|---------------------|-------------------------------|--------------------|-----------------------------------------|-------------------------------------|-----------------------------------------------------|---------------------------------------------|-----------------------------------------------|---------------------|-----------------------|
|                                       |                     |                               |                    |                                         |                                     |                                                     | 17760/17773                                 | 737/740                                       | All-cause mortality |                       |
| Stratton et al., 2010 (36)            | USA                 | Prostate cancer               | 72.8 ± 6.65        | 5 years                                 | Pill count                          | Selenium – 200 mcg                                  | 94/46                                       | 5/4                                           | Total cancer        | Agency-Industry       |
|                                       |                     |                               |                    |                                         |                                     |                                                     | 94/46                                       | 4/1                                           | All-cause mortality |                       |
| Rayman et al., 2011 – UK PRECISE (37) | UK                  | Healthy                       | 60-74              | 6 months                                | Pill count                          | Selenium – 100 mcg                                  | 380/121                                     | 1/0                                           | All-cause mortality | Agency-Industry       |
| Marshall et al., 2011 – SWOG (38)     | USA                 | High risk for prostate cancer | >40 yrs            | 3 years                                 | Pill count, plasma selenium conc.   | Selenium – 200mcg                                   | 227/225                                     | 4/6                                           | All-cause mortality | Agency                |
| Algotar et al., 2013 (39)             | USA and New Zealand | Elevated PSA                  | 65.4 ± 7.7         | USA (5 years) New Zealand (3 years)     | Pill count                          | Selenium – 200mcg or 400 mcg                        | 467/232                                     | 52/29                                         | Total cancer        | Agency-Industry       |
|                                       |                     |                               |                    |                                         |                                     |                                                     | 467/232                                     | 5/5                                           | All-cause mortality |                       |
| Karp et al., 2013(40)                 | USA                 | Previous cancer               | 24-93              | 4 years                                 | Pill count, compliance form         | Selenium – 200 mcg                                  | 1040/521                                    | 18/12                                         | All-cause mortality | Agency-Industry       |
| Goossens et al., 2016 – SELEBLAT (41) | Belgium             | Previous cancer               | 46-91              | 3 years                                 | Pill count                          | Selenium – 200 mcg                                  | 151/141                                     | 1/0                                           | All-cause mortality | Agency-Industry       |
| Thompson et al., 2016 – SELCEL(42)    | USA                 | Colorectal adenomas           | 40-80              | 2.75 years                              | Pill count, plasma selenium conc.   | Selenium – 200 mcg                                  | 910/914                                     | 17/16                                         | All-cause mortality | Agency-Industry       |
| Rayman et                             | Denmar              | Healthy                       | 60-                | 5 years                                 | Pill count                          | Selenium –                                          | 365/126                                     | 7/2                                           | CVD                 | Agency-               |

**ONLINE SUPPORTING MATERIAL**

| Study (reference)                 | Country | Health status | Age (years) | Duration (mean, median or range) | Supplement intake assessment | Supplement exposure (median or range, units) | Participants (intervention /control) | Incident cases (intervention /control) | Outcome                | Funding source |
|-----------------------------------|---------|---------------|-------------|----------------------------------|------------------------------|----------------------------------------------|--------------------------------------|----------------------------------------|------------------------|----------------|
| al., 2018 – DEN-MARK PRECISE (43) | k       |               | 74          |                                  |                              | 100mcg, 200 mcg, 300 mcg                     |                                      |                                        | mortality              | Industry-      |
|                                   |         |               |             |                                  |                              |                                              | 365/126                              | 14/4                                   | Total cancer mortality |                |
|                                   |         |               |             |                                  |                              |                                              | 365/126                              | 23/8                                   | All-cause mortality    |                |

ATBC, The Alpha- Tocopherol, Beta-Carotene Cancer Prevention Study; AMD, advanced acute degeneration; AREDS, Age-Related Eye Disease Study; ASAP, Antioxidant Supplementation in Atherosclerosis Prevention; CVD, cardiovascular disease; CARET, Carotene and Retinol Efficacy Trial; CHD, coronary heart disease; CLIPS, Critical Leg Ischaemia Prevention Study; HATS, HDL-Atherosclerosis Treatment Study; HPS, Heart Protection Study Collaborative Group; IU, international units; MI, myocardial infarction; MINVITOAX, Mineral Vitamin Antioxidant; MVP, Multivitamins and Probuco Study Group; NPC, The Nutritional Prevention of Cancer; PHS, The Physicians Health Study; PRECISE, Prevention of Cancer by Intervention with Selenium; REACT, The Roche European American Cataract Trial; SELCEL, The Selenium and Celecoxib (Sel/Cel) Trial; SELEBLAT, Selenium and Bladder Cancer Trial; SELECT, The Selenium and Vitamin E Cancer Prevention; SIT, Shadong Intervention Trial; SU.VI.MAX, The Supplémentation en Vitamines et Minéraux Antioxydants study; WAVE, Women’s Angiographic Vitamin and Estrogen; WACS, The Women’s Antioxidant Cardiovascular Study; SWOG, Southwest Oncology Group.

ONLINE SUPPORTING MATERIAL

Supplementary Table 4. GRADE assessment for antioxidants and CVD, cancer, cancer mortality, and all-cause mortality

| Outcomes                                    | Anticipated absolute effects*<br>(95% CI) |                                      | Relative effect<br>(95% CI)      | No of<br>participants<br>(studies) | Certainty of the evidence<br>(GRADE) |
|---------------------------------------------|-------------------------------------------|--------------------------------------|----------------------------------|------------------------------------|--------------------------------------|
|                                             | Risk with<br>placebo                      | Risk with<br>Antioxidants            |                                  |                                    |                                      |
| <b>Antioxidants and Total CVD</b>           | 150 per<br>1,000                          | <b>150 per 1,000</b><br>(144 to 156) | <b>RR 1.00</b><br>(0.96 to 1.04) | 49792<br>(13 RCTs)                 | ⊕⊕⊕⊕<br>HIGH                         |
| <b>Antioxidants and Total CHD</b>           | 75 per<br>1,000                           | <b>76 per 1,000</b><br>(71 to 80)    | <b>RR 1.01</b><br>(0.95 to 1.07) | 48866<br>(7 RCTs)                  | ⊕○○○<br>VERY LOW <sup>a,b,c,d</sup>  |
| <b>Antioxidants and MI</b>                  | 44 per<br>1,000                           | <b>43 per 1,000</b><br>(40 to 47)    | <b>RR 0.98</b><br>(0.90 to 1.07) | 44157<br>(10 RCTs)                 | ⊕⊕○○<br>LOW <sup>e,f</sup>           |
| <b>Antioxidants and Stroke</b>              | 32 per<br>1,000                           | <b>32 per 1,000</b><br>(29 to 35)    | <b>RR 1.00</b><br>(0.92 to 1.09) | 61222<br>(10 RCTs)                 | ⊕⊕⊕○<br>MODERATE <sup>g</sup>        |
| <b>Antioxidants and Total CVD mortality</b> | 45 per<br>1,000                           | <b>44 per 1,000</b><br>(39 to 50)    | <b>RR 0.98</b><br>(0.87 to 1.11) | 51374<br>(12 RCTs)                 | ⊕⊕⊕○<br>MODERATE <sup>h</sup>        |
| <b>Antioxidants and Total CHD mortality</b> | 50 per<br>1,000                           | <b>53 per 1,000</b><br>(48 to 58)    | <b>RR 1.05</b><br>(0.95 to 1.15) | 35999<br>(6 RCTs)                  | ⊕○○○<br>VERY LOW <sup>d,i,j,k</sup>  |
| <b>Antioxidants and MI mortality</b>        | 6 per 1,000                               | <b>10 per 1,000</b><br>(2 to 38)     | <b>RR 1.51</b><br>(0.39 to 5.93) | 947<br>(3 RCTs)                    | ⊕○○○<br>VERY LOW <sup>d,l,m</sup>    |
| <b>Antioxidants and Stroke mortality</b>    | 8 per 1,000                               | <b>7 per 1,000</b><br>(6 to 10)      | <b>RR 0.99</b><br>(0.75 to 1.32) | 63516<br>(6 RCTs)                  | ⊕⊕⊕○<br>MODERATE <sup>d,n</sup>      |
| <b>Antioxidants and Total Cancer</b>        | 78 per<br>1,000                           | <b>80 per 1,000</b><br>(76 to 84)    | <b>RR 1.02</b><br>(0.97 to 1.08) | 55527<br>(8 RCTs)                  | ⊕⊕○○<br>LOW <sup>d,o,p</sup>         |
| <b>Antioxidants and Cancer Mortality</b>    | 19 per<br>1,000                           | <b>17 per 1,000</b><br>(14 to 20)    | <b>RR 0.88</b><br>(0.74 to 1.04) | 29006<br>(5 RCTs)                  | ⊕⊕⊕○<br>MODERATE <sup>d,q</sup>      |
| <b>Antioxidants and all-cause mortality</b> | 78 per<br>1,000                           | <b>81 per 1,000</b><br>(76 to 85)    | <b>RR 1.04</b><br>(0.98 to 1.10) | 118206<br>(27 RCTs)                | ⊕⊕⊕○<br>MODERATE <sup>r</sup>        |

CI, confidence interval; CVD, cardiovascular disease; CHD, coronary heart disease; GRADE, Grading of Recommendations Assessment Development and Evaluation; MI, Myocardial infarction; RR, risk ratio.

Explanations

## ONLINE SUPPORTING MATERIAL

- a. Serious risk of bias for antioxidant supplementation and Total CHD risk as both allocation concealment and incomplete outcome data was either high or unclear in >70% of studies.
- b. Serious indirectness for antioxidants supplementation and total CHD risk as the study population were mostly European (>95%) and all but one of the studies were conducted in specific populations: previous CHD (HPS Group, 2002); coronary stenosis (Waters et al., 2002); smokers (Tornwall et al., 2004 and Mooney et al., 2005; and in those undergoing angioplasty (Tardif et al., 1997).
- c. Serious imprecision for antioxidant supplementation and total CHD risk as the 95% CI (RR, 0.95-1.07) overlaps with the minimally important difference for clinical harm (RR>1.05).
- d. Publication bias was not assessed since there were <10 studies.
- e. Serious risk of bias for antioxidant supplementation and MI risk as both allocation concealment and incomplete outcome data was either high or unclear in 70% and 60% of studies respectively.
- f. Serious imprecision for antioxidant supplementation and MI risk as the 95% CI (RR, 0.90-1.07) includes both clinically important benefit (RR<0.95) and harm (RR>1.05).
- g. Serious imprecision for antioxidant supplementation and stroke risk as the 95% CI (RR, 0.91-1.09) includes both clinically important benefit (RR<0.95) and harm (RR>1.05).
- h. Serious imprecision for antioxidant supplementation and CVD mortality risk as the 95% CI (RR, 0.87-1.11) include both clinically important benefit (RR<0.95) and harm (RR>1.05).
- i. Serious risk of bias for antioxidant supplementation and CHD mortality risk as incomplete outcome data was either high or unclear in >65% of studies.
- j. Serious indirectness for antioxidants supplementation and CHD mortality risk as the study population were mostly European (>98%) and all of the studies were conducted in specific populations: previous CHD (HPS Group, 2002); smokers (Tornwall et al., 2004 and Mooney et al., 2005; in those undergoing angioplasty (Tardif et al., 1997) and in an older population with cataracts (Chylack et al., 2002).
- k. Serious imprecision for antioxidant supplementation and CHD mortality risk as the 95% CI (RR, 0.95-1.15) overlaps with the minimally important difference for clinical harm (RR>1.05).
- l. Serious indirectness for antioxidant supplementation and MI mortality risk, as the included studies were conducted in specific populations: smokers (Mooney et al., 2005), peripheral artery disease (CLIPS group 2007) and in an older population with cataracts (Chylack et al., 2002).
- m. Very serious imprecision for antioxidant supplementation and MI mortality risk as the 95% CI (RR, 0.39-5.93) include both clinically important benefit (RR<0.95) and harm (RR>1.05).
- n. Serious imprecision for antioxidant supplementation and stroke mortality risk as the 95% CI (RR, 0.75-1.32) include both clinically important benefit (RR<0.95) and harm (RR>1.05).
- o. Serious indirectness for antioxidant supplementation and total cancer risk as three studies accounting for more than 70% of the population were conducted in males only.
- p. Serious imprecision for antioxidant supplementation and total cancer risk as the 95% CI (RR, 0.97-1.08) overlaps with the minimally important difference for clinical harm (RR>1.05).
- q. Serious imprecision for antioxidant supplementation and cancer mortality risk as the 95% CI (RR, 0.74-1.04) overlaps with the minimally important difference for clinical benefit (RR<0.95).

## ONLINE SUPPORTING MATERIAL

r. Serious imprecision for antioxidant supplementation and all-cause mortality risk as the 95% CI (RR, 0.98-1.10) overlaps with the minimally important difference for clinical harm (RR>1.05).

ONLINE SUPPORTING MATERIAL

Supplementary Table 5. GRADE assessment for selenium and CVD, cancer, cancer mortality, and all-cause mortality.

| Outcomes                                | Anticipated absolute effects*<br>(95% CI) |                                      | Relative effect<br>(95% CI)       | № of participants<br>(studies) | Certainty of the evidence<br>(GRADE) |
|-----------------------------------------|-------------------------------------------|--------------------------------------|-----------------------------------|--------------------------------|--------------------------------------|
|                                         | Risk with placebo                         | Risk with Selenium                   |                                   |                                |                                      |
| <b>Selenium and total CVD</b>           | 118 per 1,000                             | <b>121 per 1,000</b><br>(114 to 128) | <b>RR 1.02</b><br>(0.96 to 1.08)  | 36978<br>(4 RCTs)              | ⊕⊕○○<br>LOW <sup>a,b,c</sup>         |
| <b>Selenium and total CHD</b>           | 90 per 1,000                              | <b>71 per 1,000</b><br>(22 to 240)   | <b>RR 0.79</b><br>(0.24 to 2.66)  | 1445<br>(3 RCTs)               | ⊕○○○<br>VERY LOW <sup>c,d,e</sup>    |
| <b>Selenium and MI</b>                  | 68 per 1,000                              | <b>50 per 1,000</b><br>(16 to 157)   | <b>RR 0.74</b><br>(0.24 to 2.31)  | 1445<br>(3 RCTs)               | ⊕○○○<br>VERY LOW <sup>c,f,g</sup>    |
| <b>Selenium and Stroke</b>              | 11 per 1,000                              | <b>11 per 1,000</b><br>(9 to 14)     | <b>RR 1.06</b><br>(0.87 to 1.29)  | 36897<br>(3 RCTs)              | ⊕⊕○○<br>LOW <sup>c,h,i</sup>         |
| <b>Selenium and CVD mortality</b>       | 16 per 1,000                              | <b>16 per 1,000</b><br>(13 to 20)    | <b>RR 1.00</b><br>(0.81 to 1.22)  | 37469<br>(5 RCTs)              | ⊕⊕○○<br>LOW <sup>c,j,k</sup>         |
| <b>Selenium and CHD mortality</b>       | 18 per 1,000                              | <b>10 per 1,000</b><br>(0 to 248)    | <b>RR 0.54</b><br>(0.02 to 13.71) | 441<br>(2 RCTs)                | ⊕○○○<br>VERY LOW <sup>c,l,m</sup>    |
| <b>Selenium and MI mortality</b>        | 17 per 1,000                              | <b>14 per 1,000</b><br>(3 to 57)     | <b>RR 0.85</b><br>(0.21 to 3.43)  | 1445<br>(3 RCTs)               | ⊕○○○<br>VERY LOW <sup>c,n,o</sup>    |
| <b>Selenium and Stroke mortality</b>    | 1 per 1,000                               | <b>1 per 1,000</b><br>(1 to 2)       | <b>RR 1.24</b><br>(0.65 to 2.34)  | 35533<br>(1 RCT)               | ⊕⊕○○<br>LOW <sup>c,p,q,r</sup>       |
| <b>Selenium and Total cancer</b>        | 98 per 1,000                              | <b>89 per 1,000</b><br>(77 to 105)   | <b>RR 0.91</b><br>(0.78 to 1.07)  | 38044<br>(5 RCTs)              | ⊕⊕○○<br>LOW <sup>c,s,t</sup>         |
| <b>Selenium and cancer mortality</b>    | 16 per 1,000                              | <b>14 per 1,000</b><br>(9 to 22)     | <b>RR 0.87</b><br>(0.56 to 1.37)  | 37336<br>(3 RCTs)              | ⊕○○○<br>VERY LOW <sup>c,u,v,w</sup>  |
| <b>Selenium and all-cause mortality</b> | 43 per 1,000                              | <b>43 per 1,000</b><br>(39 to 47)    | <b>RR 0.99</b><br>(0.90 to 1.08)  | 42938<br>(12 RCTs)             | ⊕⊕○○<br>LOW <sup>x,y</sup>           |

CI, confidence interval; CVD, cardiovascular disease; CHD, coronary heart disease; GRADE, Grading of Recommendations Assessment Development and Evaluation; MI, Myocardial infarction; RR, risk ratio.

## ONLINE SUPPORTING MATERIAL

### Explanations

- a. Serious indirectness for selenium supplementation and total CVD risk as >98% of the population were men.
- b. Serious imprecision for selenium supplementation and total CVD risk as the 95% CI (RR, 0.96-1.08) overlaps with the minimally important difference for clinical harm (RR>1.05).
- c. Publication bias was not assessed since there were <10 studies.
- d. Serious indirectness for selenium supplementation and total CHD risk as all of the studies were conducted in specific populations: previous MI (Korpela et al., 1989); esophageal squamous dysplasia (Limburg et al., 2005) and previous skin cancer (Stranges et al., 2006).
- e. Very serious imprecision for selenium supplementation and total CHD risk as the 95% CI (RR, 0.24-2.66) includes both clinically important benefit (RR<0.95) and harm (RR>1.05).
- f. Serious indirectness for selenium supplementation and MI risk as all of the studies were conducted in specific populations: previous MI (Korpela et al., 1989); esophageal squamous dysplasia (Limburg et al., 2005) and previous skin cancer (Stranges et al., 2006).
- g. Very serious imprecision for selenium supplementation and MI risk as the 95% CI (RR, 0.24-2.31) includes both clinically important benefit (RR<0.95) and harm (RR>1.05).
- h. Serious indirectness for selenium supplementation and stroke risk as >98% of the population were men.
- i. Serious imprecision for selenium supplementation and stroke risk as the 95% CI (RR, 0.87-1.29) includes both clinically important benefit (RR<0.95) and harm (RR>1.05).
- j. Serious indirectness for selenium supplementation and CVD mortality risk as >95% of the population were men.
- k. Serious imprecision for selenium supplementation and CVD mortality risk as the 95% CI (RR, 0.81-1.22) includes both clinically important benefit (RR<0.95) and harm (RR>1.05).
- l. Serious indirectness for selenium supplementation and CHD mortality risk as both studies were conducted in specific populations: previous MI (Korpela et al., 1989) and esophageal squamous dysplasia (Limburg et al., 2005).
- m. Very serious imprecision for selenium supplementation and CHD mortality risk as the 95% CI (RR, 0.02-13.71) includes both clinically important benefit (RR<0.95) and harm (RR>1.05).
- n. Serious indirectness for selenium supplementation and MI mortality risk as all of the studies were conducted in specific populations: previous MI (Korpela et al., 1989); esophageal squamous dysplasia (Limburg et al., 2005) and previous skin cancer (Stranges et al., 2006).
- o. Very serious imprecision for selenium supplementation and MI mortality risk as the 95% CI (RR, 0.21-3.43) includes both clinically important benefit (RR<0.95) and harm (RR>1.05).
- p. Unable to assess inconsistency as only one study was included.
- q. Serious indirectness for selenium supplementation and stroke mortality risk as the sole study included was conducted in men only.
- r. Serious imprecision for selenium supplementation and stroke mortality risk as the 95% CI (RR, 0.65-2.34) includes both clinically important benefit (RR<0.95) and harm (RR>1.05).
- s. Serious indirectness for selenium supplementation and total cancer risk as >98% of the population were men.

## ONLINE SUPPORTING MATERIAL

- t. Serious imprecision for selenium supplementation and total cancer risk as the 95% CI (RR, 0.78-1.07) includes both clinically important benefit (RR<0.95) and harm (RR>1.05).
- u. Serious inconsistency for selenium supplementation and cancer mortality risk, as  $I^2 = 71\%$  and  $P=0.03$ .
- v. Serious indirectness for selenium supplementation and cancer mortality risk as >98% of the population were men.
- w. Serious imprecision for selenium supplementation and cancer mortality risk as the 95% CI (RR, 0.56-1.37) includes both clinically important benefit (RR<0.95) and harm (RR>1.05).
- x. Serious indirectness for selenium supplementation and total cancer risk as >90% of the population were men.
- y. Serious imprecision for selenium supplementation and all-cause mortality risk as the 95% CI (RR, 0.90-1.08) includes both clinically important benefit (RR<0.95) and harm (RR>1.05).



ONLINE SUPPORTING MATERIAL

Antioxidant supplements and risk of CVD, cancer & all-cause mortality

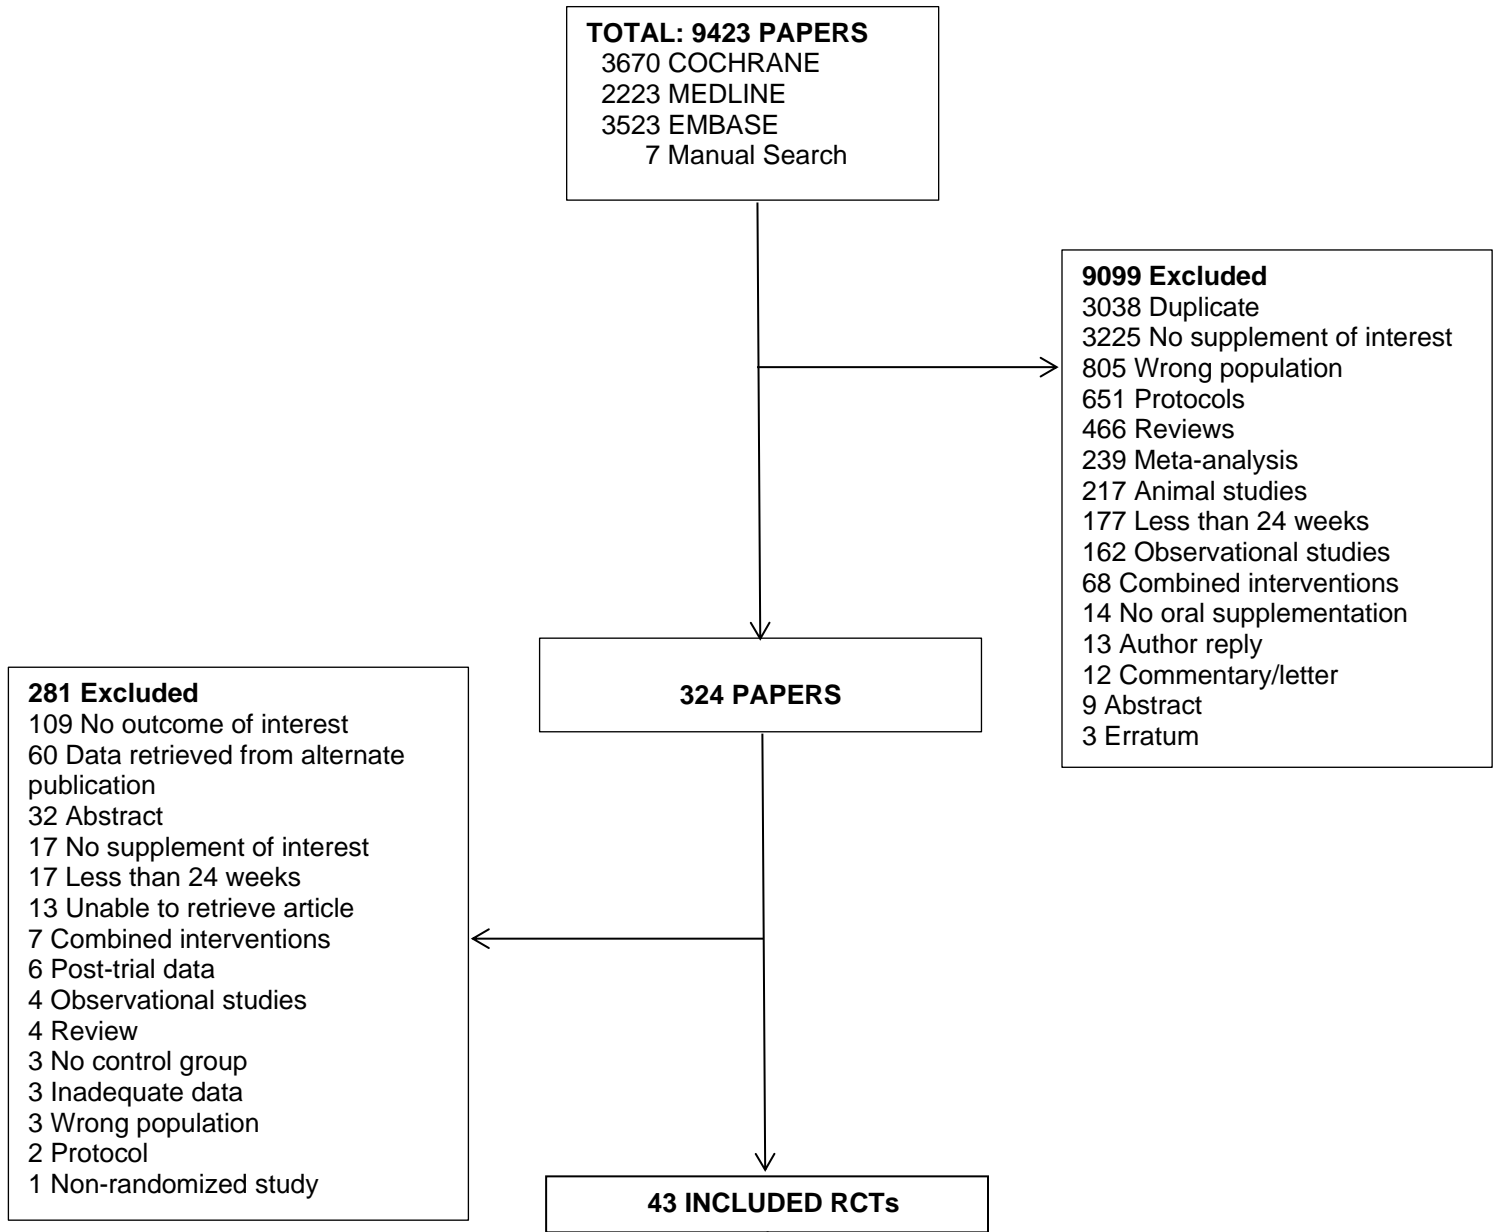

**Number of RCTs for each outcome**

|                     | Antioxidants | Selenium |
|---------------------|--------------|----------|
| Total CVD           | 13           | 4        |
| Total CHD           | 7            | 3        |
| MI                  | 10           | 3        |
| Stroke              | 10           | 3        |
| CVD mortality       | 12           | 5        |
| CHD mortality       | 6            | 2        |
| MI mortality        | 3            | 3        |
| Stroke mortality    | 6            | 1        |
| Cancer              | 8            | 5        |
| Cancer mortality    | 5            | 3        |
| All-cause mortality | 27           | 12       |

## ONLINE SUPPORTING MATERIAL

**Supplementary Figure 1.** Search Summary. Flow diagram outlining the search strategy used to identify publications that report RCT data on antioxidant supplementation and risk of CVD, CVD outcomes, cancer and all-cause mortality. The publications are from database inceptions to June 5, 2020 of single RCTs identified by searching Cochrane, Medline, Embase and by manual searches. Titles and abstracts were reviewed in the first stage of screening while full manuscript review was done in the second stage. RCT, randomized controlled trial; CVD, cardiovascular disease; CHD, coronary heart disease; MI, myocardial infarction.

## ONLINE SUPPORTING MATERIAL

|                                                | Random sequence generation (selection bias) | Allocation concealment (selection bias) | Blinding of participants and personnel (performance bias) | Incomplete outcome data (attrition bias) | Selective reporting (reporting bias) |
|------------------------------------------------|---------------------------------------------|-----------------------------------------|-----------------------------------------------------------|------------------------------------------|--------------------------------------|
| AREDS Research Group 2001                      | +                                           | +                                       | +                                                         | +                                        | +                                    |
| Arruda et al., 2013                            | ?                                           | +                                       | +                                                         | +                                        | +                                    |
| Bairati et al., 2006                           | +                                           | ?                                       | +                                                         | +                                        | +                                    |
| Blot et al., 1993 - Linxian Trial              | ?                                           | ?                                       | ?                                                         | ?                                        | +                                    |
| Bonelli et al., 2013                           | ?                                           | +                                       | +                                                         | +                                        | +                                    |
| Brown et al., 2001 - HATS                      | ?                                           | +                                       | +                                                         | +                                        | +                                    |
| Chylack et al., 2002 - REACT                   | +                                           | +                                       | +                                                         | +                                        | +                                    |
| CLIPS Group 2007                               | +                                           | -                                       | +                                                         | +                                        | +                                    |
| Collins et al., 2002 - HPS Collaborative Group | +                                           | +                                       | +                                                         | +                                        | +                                    |
| Cook et al., 2007 - WAC                        | ?                                           | +                                       | +                                                         | +                                        | +                                    |
| Correa et al., 2000                            | +                                           | +                                       | +                                                         | +                                        | +                                    |
| De Cosse et al., 1989                          | +                                           | ?                                       | +                                                         | +                                        | +                                    |
| Girodon et al., 1997                           | ?                                           | +                                       | +                                                         | ?                                        | +                                    |
| Girodon et al., 1999 - MIN.VIT.AOX             | ?                                           | +                                       | +                                                         | +                                        | +                                    |
| Hercberg et al., 2010 - SU.VI.MAX              | +                                           | ?                                       | +                                                         | +                                        | +                                    |
| Jacobson et al., 2000                          | ?                                           | ?                                       | +                                                         | -                                        | +                                    |
| Leppala 2000 - ATBC                            | ?                                           | -                                       | +                                                         | ?                                        | +                                    |
| Lippman et al., 2009 - SELECT                  | ?                                           | +                                       | +                                                         | +                                        | +                                    |
| Ma et al., 2012 - SIT                          | ?                                           | -                                       | +                                                         | +                                        | +                                    |
| McKeown-Eyssen et al., 1988                    | ?                                           | ?                                       | +                                                         | -                                        | ?                                    |
| Mooney et al., 2005                            | +                                           | +                                       | +                                                         | -                                        | +                                    |
| Omenn et al., 1996 - CARET                     | ?                                           | ?                                       | +                                                         | +                                        | +                                    |
| Plummer et al., 2007                           | ?                                           | -                                       | +                                                         | +                                        | +                                    |
| Salonen et al., 2000 - ASAP                    | ?                                           | +                                       | +                                                         | +                                        | +                                    |
| Sesso et al., 2008 - PHS2                      | +                                           | -                                       | +                                                         | +                                        | +                                    |
| Stone et al., 2005                             | ?                                           | ?                                       | +                                                         | ?                                        | +                                    |
| Tardif et al., 1997 - MVP                      | ?                                           | ?                                       | +                                                         | -                                        | +                                    |
| Tornwall et al., 2004 - ATBC                   | ?                                           | -                                       | +                                                         | ?                                        | +                                    |
| Virtamo et al., 2003 - ATBC                    | ?                                           | -                                       | +                                                         | ?                                        | +                                    |
| Wang et al., 2014 - PHS II                     | +                                           | -                                       | +                                                         | +                                        | +                                    |
| Waters et al., 2002 - WAVE                     | ?                                           | -                                       | +                                                         | -                                        | +                                    |

**Supplementary Figure 2.** Risk of bias summary for antioxidant supplementation and CVD, CVD outcomes, cancer, cancer mortality, and all-cause mortality. Review authors' judgments about each risk of bias item for each included study.

## ONLINE SUPPORTING MATERIAL

|                                       | Random sequence generation (selection bias) | Allocation concealment (selection bias) | Blinding of participants and personnel (performance bias) | Incomplete outcome data (attrition bias) | Selective reporting (reporting bias) |
|---------------------------------------|---------------------------------------------|-----------------------------------------|-----------------------------------------------------------|------------------------------------------|--------------------------------------|
| Algotar et al., 2013                  | ?                                           | +                                       | +                                                         | +                                        | +                                    |
| Duffield-Lillico et al., 2002 - NPC   | ?                                           | +                                       | +                                                         | +                                        | +                                    |
| Goossens et al., 2016 - SELEBLAT      | +                                           | -                                       | +                                                         | +                                        | +                                    |
| Karp et al., 2013                     | ?                                           | +                                       | +                                                         | +                                        | +                                    |
| Korpela et al., 1989                  | ?                                           | ?                                       | +                                                         | ?                                        | +                                    |
| Limburg et al., 2005                  | +                                           | +                                       | +                                                         | +                                        | +                                    |
| Lippman et al., 2009 - SELECT         | ?                                           | +                                       | +                                                         | +                                        | +                                    |
| Marshall et al., 2011 - SWOG          | ?                                           | ?                                       | +                                                         | ?                                        | +                                    |
| Rayman et al., 2011 - UK PRECISE      | +                                           | +                                       | +                                                         | +                                        | +                                    |
| Rayman et al., 2018 - DENMARK PRECISE | +                                           | ?                                       | +                                                         | +                                        | +                                    |
| Stranges et al., 2006 - NPC           | ?                                           | +                                       | +                                                         | +                                        | +                                    |
| Stratton et al., 2010                 | ?                                           | ?                                       | +                                                         | +                                        | +                                    |
| Thompson et al., 2016                 | +                                           | -                                       | ?                                                         | +                                        | +                                    |

**Supplementary Figure 3.** Risk of bias summary for selenium supplementation and CVD, CVD outcomes, cancer, cancer mortality, and all-cause mortality. Review authors' judgments about each risk of bias item for each included study.

## ONLINE SUPPORTING MATERIAL

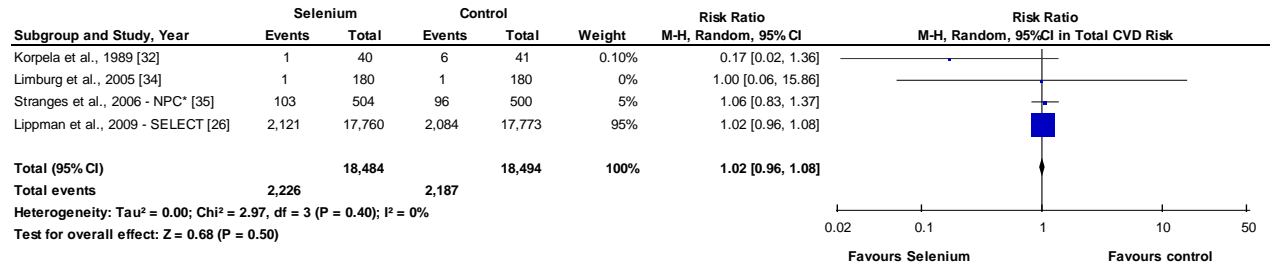

**Supplementary Figure 4. Forest plot of selenium supplementation only and total CVD risk.** M-H, Mantel-Haenszel, CVD, cardiovascular disease. **\*Stranges et al., 2006 was used as it contained data up until the end of treatment but only in those free of CVD at baseline (35).** The diamond represents the pooled risk estimate. Inter-study heterogeneity was tested using the Cochran Q statistic (Chi<sup>2</sup>) at a significance level of P < 0.10, and quantified by the I<sup>2</sup> statistic. An I<sup>2</sup> value ≥ 50% is considered to indicate substantial heterogeneity. All results are presented as risk ratios with 95% Confidence Intervals, using the Mantel-Haenszel method with random effects model.

## ONLINE SUPPORTING MATERIAL

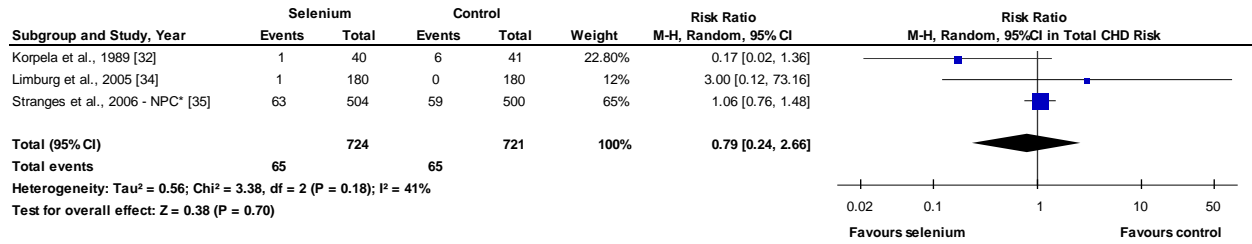

**Supplementary Figure 5. Forest plot of selenium supplementation only and total CHD risk.** M-H, Mantel-Haenszel, CHD, coronary heart disease. **\*Stranges et al., 2006 was used as it contained data up until the end of treatment but only in those free of CVD at baseline (35).** The diamond represents the pooled risk estimate. Inter-study heterogeneity was tested using the Cochran Q statistic (Chi<sup>2</sup>) at a significance level of P < 0.10, and quantified by the I<sup>2</sup> statistic. An I<sup>2</sup> value ≥ 50% is considered to indicate substantial heterogeneity. All results are presented as risk ratios with 95% Confidence Intervals, using the Mantel-Haenszel method with random effects model.

## ONLINE SUPPORTING MATERIAL

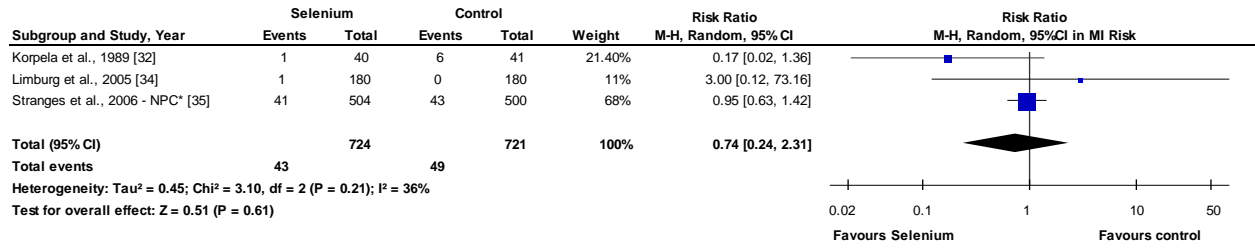

**Supplementary Figure 6. Forest plot of selenium supplementation only and MI risk.** M-H, Mantel-Haenszel, MI, myocardial infarction. **\*Stranges et al., 2006 was used as it contained data up until the end of treatment but only in those free of CVD at baseline (35).** The diamond represents the pooled risk estimate. Inter-study heterogeneity was tested using the Cochran Q statistic (Chi<sup>2</sup>) at a significance level of P < 0.10, and quantified by the I<sup>2</sup> statistic. An I<sup>2</sup> value ≥ 50% is considered to indicate substantial heterogeneity. All results are presented as risk ratios with 95% Confidence Intervals, using the Mantel-Haenszel method with random effects model.

## ONLINE SUPPORTING MATERIAL

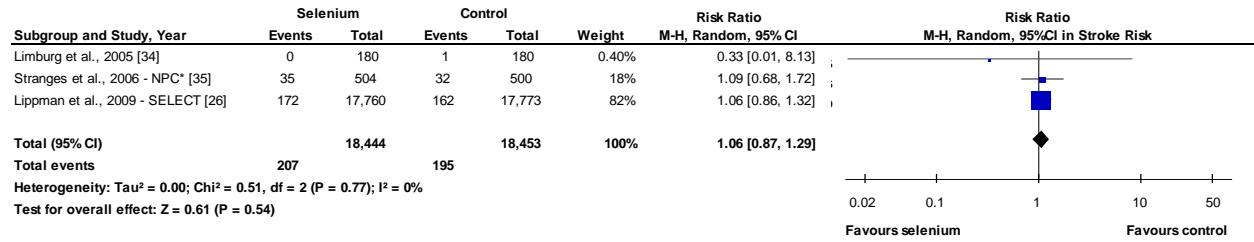

### Supplementary Figure 7. Forest plot of selenium supplementation only and stroke risk.

M-H, Mantel-Haenszel. \*Stranges et al., 2006 was used as it contained data up until the end of treatment but only in those free of CVD at baseline (35). The diamond represents the pooled risk estimate. Inter-study heterogeneity was tested using the Cochran Q statistic (Chi<sup>2</sup>) at a significance level of P < 0.10, and quantified by the I<sup>2</sup> statistic. An I<sup>2</sup> value ≥ 50% is considered to indicate substantial heterogeneity. All results are presented as risk ratios with 95% Confidence Intervals, using the Mantel-Haenszel method with random effects model.



## ONLINE SUPPORTING MATERIAL

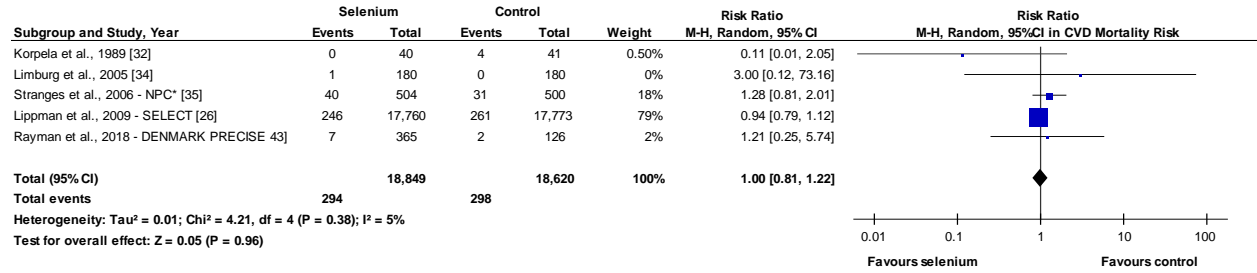

**Supplementary Figure 8. Forest plot of selenium supplementation only and CVD mortality risk.** M-H, Mantel-Haenszel, CVD, cardiovascular disease. **\*Stranges et al., 2006 was used as it contained data up until the end of treatment but only in those free of CVD at baseline (35).** The diamond represents the pooled risk estimate. Inter-study heterogeneity was tested using the Cochran Q statistic (Chi<sup>2</sup>) at a significance level of P < 0.10, and quantified by the I<sup>2</sup> statistic. An I<sup>2</sup> value ≥ 50% is considered to indicate substantial heterogeneity. All results are presented as risk ratios with 95% Confidence Intervals, using the Mantel-Haenszel method with random effects model.

## ONLINE SUPPORTING MATERIAL

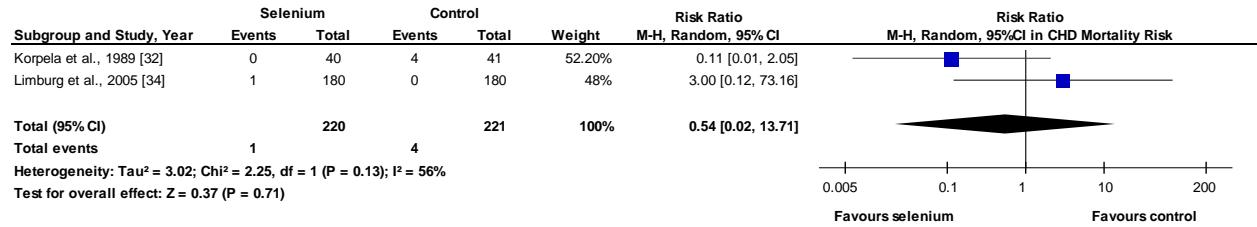

**Supplementary Figure 9. Forest plot of selenium supplementation only and CHD mortality risk.** M-H, Mantel-Haenszel, CHD, coronary heart disease. The diamond represents the pooled risk estimate. Inter-study heterogeneity was tested using the Cochran Q statistic (Chi<sup>2</sup>) at a significance level of P < 0.10, and quantified by the I<sup>2</sup> statistic. An I<sup>2</sup> value ≥ 50% is considered to indicate substantial heterogeneity. All results are presented as risk ratios with 95% Confidence Intervals, using the Mantel-Haenszel method with random effects model.

## ONLINE SUPPORTING MATERIAL

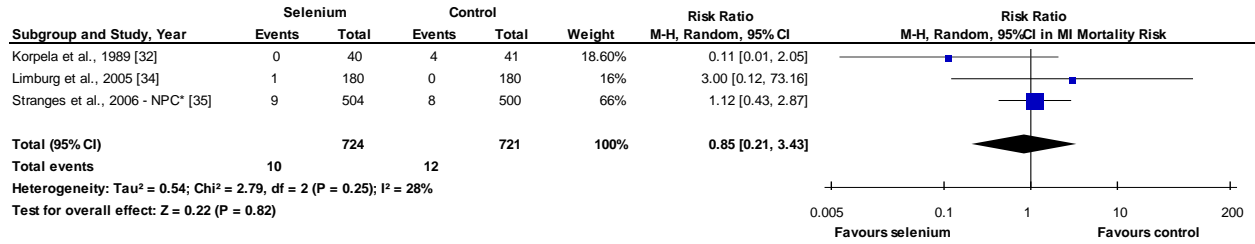

**Supplementary Figure 10. Forest plot of selenium supplementation only and MI mortality risk.** M-H, Mantel-Haenszel, MI, myocardial infarction. **\*Stranges et al., 2006 was used as it contained data up until the end of treatment but only in those free of CVD at baseline (35).** The diamond represents the pooled risk estimate. Inter-study heterogeneity was tested using the Cochran Q statistic (Chi<sup>2</sup>) at a significance level of P < 0.10, and quantified by the I<sup>2</sup> statistic. An I<sup>2</sup> value ≥ 50% is considered to indicate substantial heterogeneity. All results are presented as risk ratios with 95% Confidence Intervals, using the Mantel-Haenszel method with random effects model.

## ONLINE SUPPORTING MATERIAL

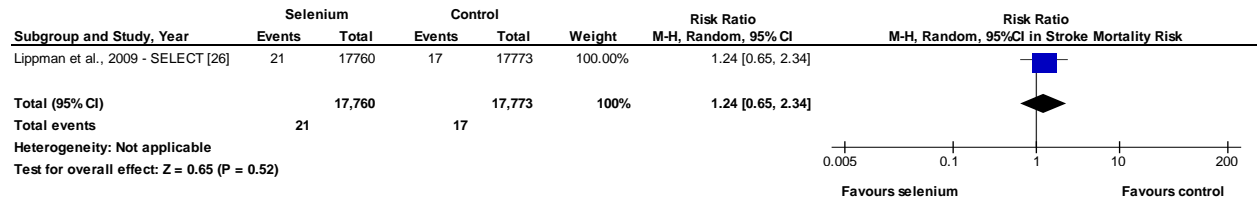

**Supplementary Figure 11. Forest plot of selenium supplementation only and stroke mortality risk.** M-H, Mantel-Haenszel. The diamond represents the pooled risk estimate. Inter-study heterogeneity was tested using the Cochran Q statistic ( $\chi^2$ ) at a significance level of  $P < 0.10$ , and quantified by the  $I^2$  statistic. An  $I^2$  value  $\geq 50\%$  is considered to indicate substantial heterogeneity. All results are presented as risk ratios with 95% Confidence Intervals, using the Mantel-Haenszel method with random effects model.

## ONLINE SUPPORTING MATERIAL

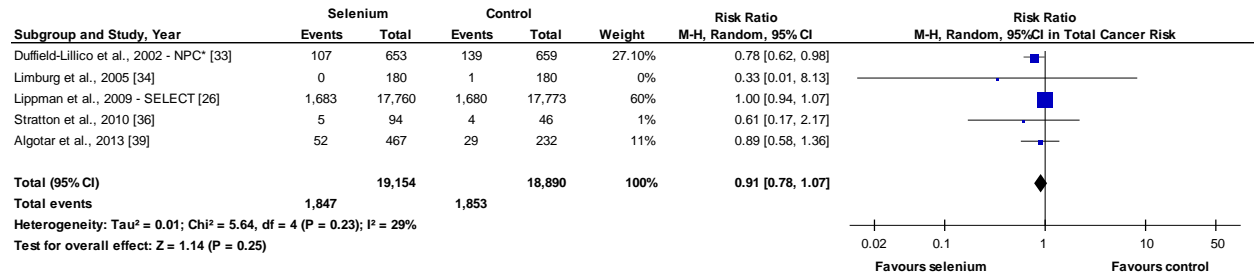

**Supplementary Figure 12. Forest plot of selenium supplementation only and total cancer risk.** M-H, Mantel-Haenszel. **\*Duffield-Lillico et al., 2002 excluded 62 participants from their analysis, including 4 cancer cases; these were re-added to the events and totals(33).** The diamond represents the pooled risk estimate. Inter-study heterogeneity was tested using the Cochran Q statistic (Chi<sup>2</sup>) at a significance level of P < 0.10, and quantified by the I<sup>2</sup> statistic. An I<sup>2</sup> value ≥ 50% is considered to indicate substantial heterogeneity. All results are presented as risk ratios with 95% Confidence Intervals, using the Mantel-Haenszel method with random effects model.

## ONLINE SUPPORTING MATERIAL

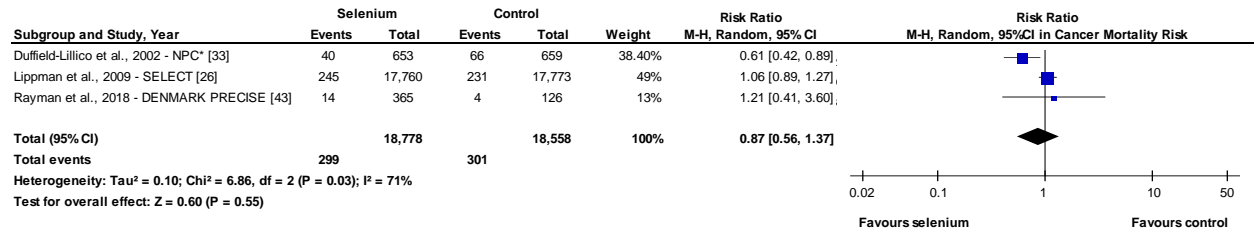

**Supplementary Figure 13. Forest plot of selenium supplementation only and cancer mortality risk. M-H, Mantel-Haenszel. \* Duffield-Lillico et al., 2002 excluded 62 participants from their analysis; these were re-added to the totals(33).** The diamond represents the pooled risk estimate. Inter-study heterogeneity was tested using the Cochran Q statistic (Chi<sup>2</sup>) at a significance level of P < 0.10, and quantified by the I<sup>2</sup> statistic. An I<sup>2</sup> value ≥ 50% is considered to indicate substantial heterogeneity. All results are presented as risk ratios with 95% Confidence Intervals, using the Mantel-Haenszel method with random effects model.

## ONLINE SUPPORTING MATERIAL

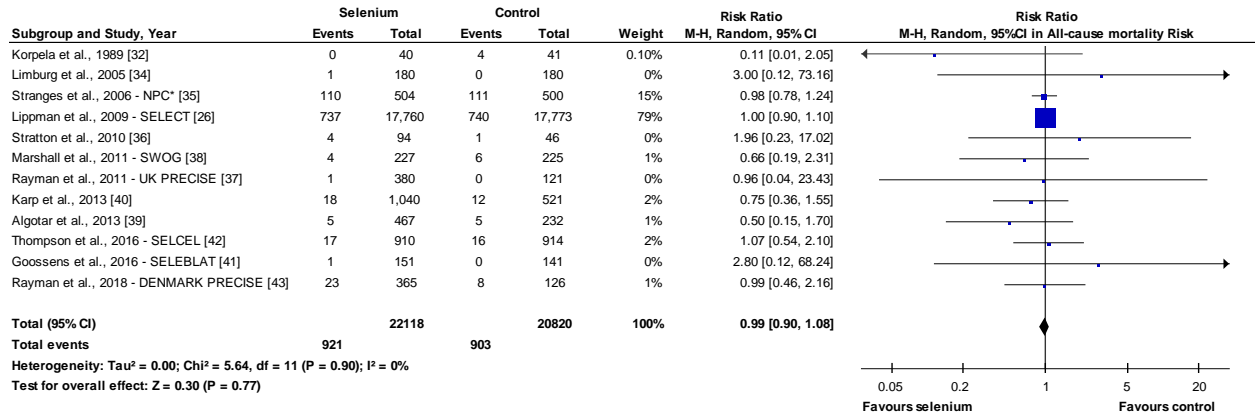

**Supplementary Figure 14. Forest plot of selenium supplementation only and all-cause mortality risk. M-H, Mantel-Haenszel. \*Stranges et al., 2006 was used as it contained data up until the end of treatment but only in those free of CVD at baseline (35).** The diamond represents the pooled risk estimate. Inter-study heterogeneity was tested using the Cochran Q statistic (Chi<sup>2</sup>) at a significance level of P < 0.10, and quantified by the I<sup>2</sup> statistic. An I<sup>2</sup> value ≥ 50% is considered to indicate substantial heterogeneity. All results are presented as risk ratios with 95% Confidence Intervals, using the Mantel-Haenszel method with random effects model.

## ONLINE SUPPORTING MATERIAL

### A. Selenium supplementation and all-cause mortality risk

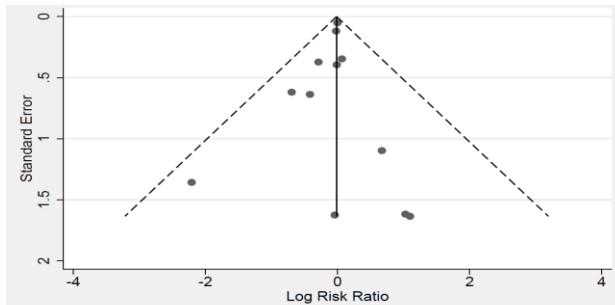

Begg's test = 0.63

Egger's test = 0.44

**Supplementary Figure 15. Funnel plot of selenium supplementation and all-cause mortality risk.** Dashed lines represent pseudo – 95% confidence intervals (CI). The circles represent risk estimates for each study, and the horizontal lines represent standard errors of the RR. We were unable to test for funnel plot asymmetry for other CVD and cancer outcomes (<10 RCTs).



## ONLINE SUPPORTING MATERIAL

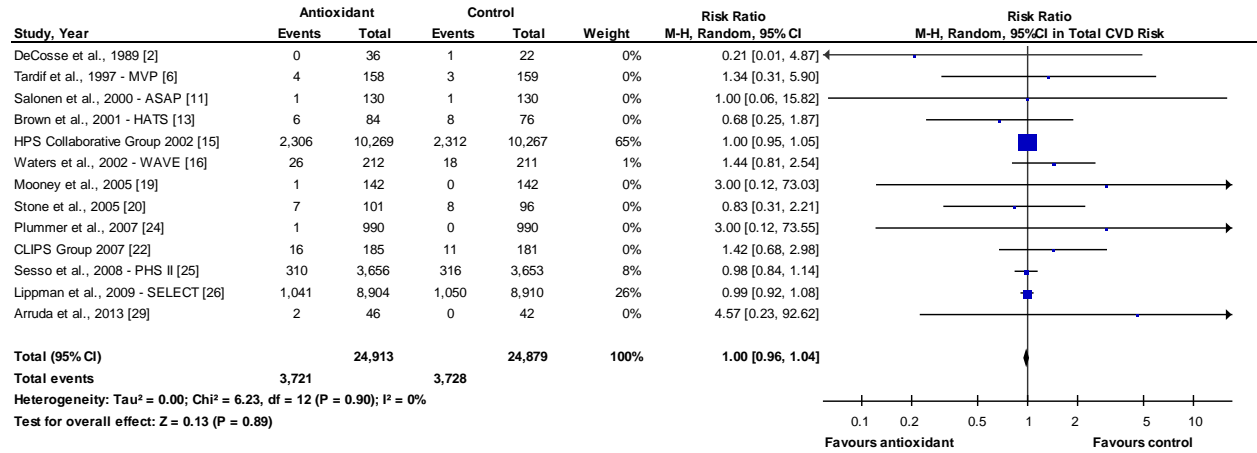

**Supplementary Figure 16. Forest plot of antioxidant supplementation and total CVD risk.** M-H, Mantel-Haenszel, CVD, cardiovascular disease. The diamond represents the pooled risk estimate. Inter-study heterogeneity was tested using the Cochran Q statistic (Chi<sup>2</sup>) at a significance level of P < 0.10, and quantified by the I<sup>2</sup> statistic. An I<sup>2</sup> value ≥ 50% is considered to indicate substantial heterogeneity. All results are presented as risk ratios with 95% Confidence Intervals, using the Mantel-Haenszel method with random effects model.

## ONLINE SUPPORTING MATERIAL

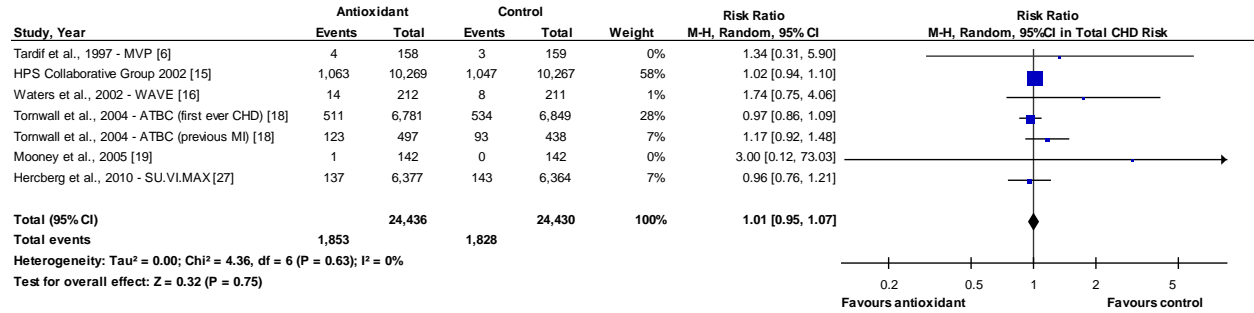

**Supplementary Figure 17. Forest plot of antioxidant supplementation and total CHD risk.** M-H, Mantel-Haenszel, CHD, coronary heart disease. The diamond represents the pooled risk estimate. Inter-study heterogeneity was tested using the Cochran Q statistic (Chi<sup>2</sup>) at a significance level of P < 0.10, and quantified by the I<sup>2</sup> statistic. An I<sup>2</sup> value ≥ 50% is considered to indicate substantial heterogeneity. All results are presented as risk ratios with 95% Confidence Intervals, using the Mantel-Haenszel method with random effects model.

## ONLINE SUPPORTING MATERIAL

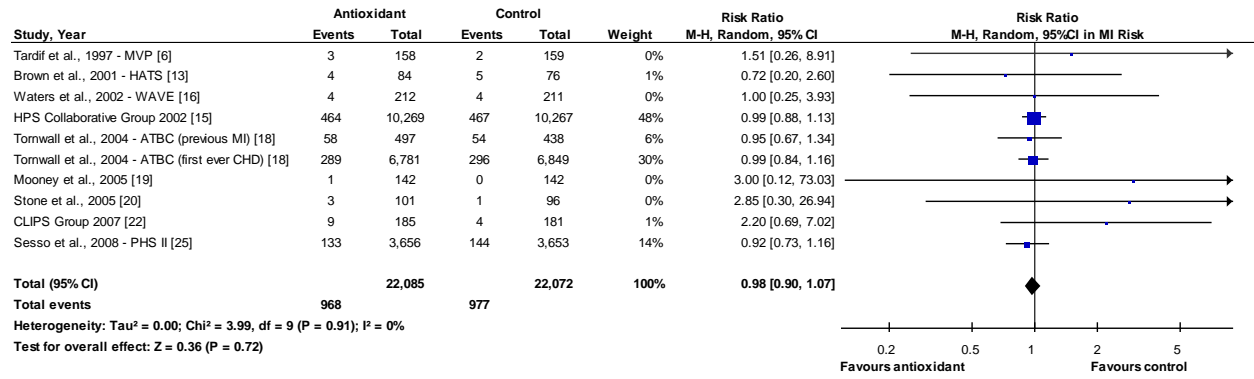

### Supplementary Figure 18. Forest plot of antioxidant supplementation and MI risk.

M-H, Mantel-Haenszel, MI, myocardial infarction. The diamond represents the pooled risk estimate. Inter-study heterogeneity was tested using the Cochran Q statistic (Chi<sup>2</sup>) at a significance level of P < 0.10, and quantified by the I<sup>2</sup> statistic. An I<sup>2</sup> value ≥ 50% is considered to indicate substantial heterogeneity. All results are presented as risk ratios with 95% Confidence Intervals, using the Mantel-Haenszel method with random effects model.

## ONLINE SUPPORTING MATERIAL

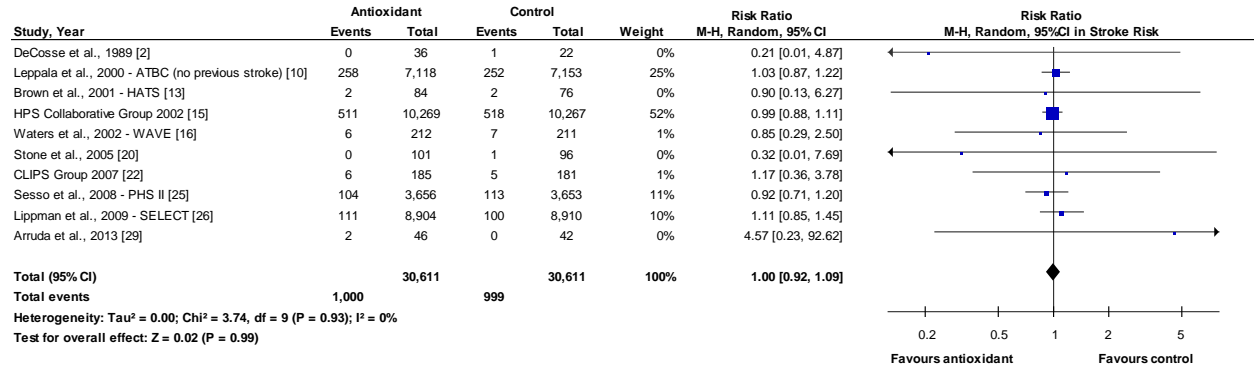

**Supplementary Figure 19. Forest plot of antioxidant supplementation and stroke risk.** M-H, Mantel-Haenszel. The diamond represents the pooled risk estimate. Inter-study heterogeneity was tested using the Cochran Q statistic (Chi<sup>2</sup>) at a significance level of P < 0.10, and quantified by the I<sup>2</sup> statistic. An I<sup>2</sup> value ≥ 50% is considered to indicate substantial heterogeneity. All results are presented as risk ratios with 95% Confidence Intervals, using the Mantel-Haenszel method with random effects model.

## ONLINE SUPPORTING MATERIAL

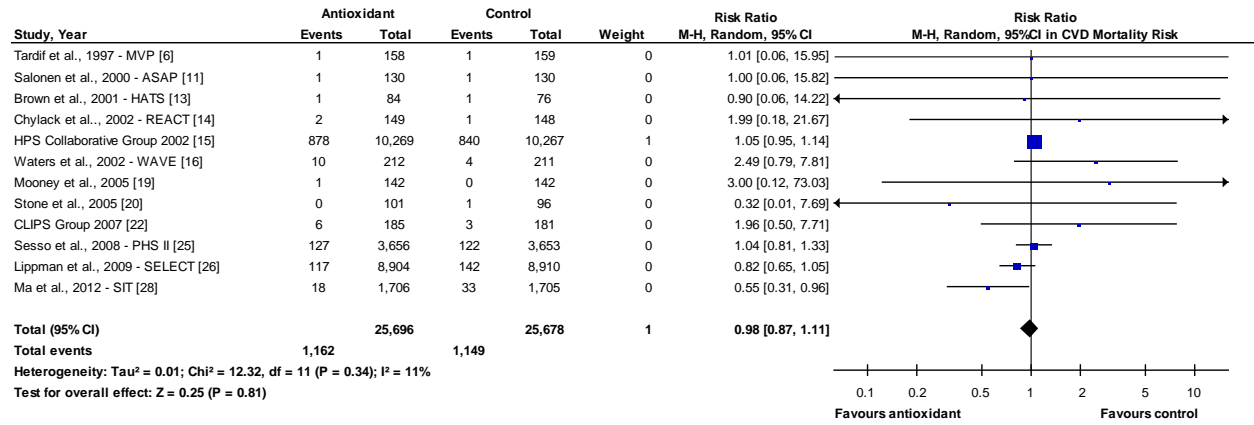

### Supplementary Figure 20. Forest plot of antioxidant supplementation and CVD mortality risk.

M-H, Mantel-Haenszel, CVD, cardiovascular disease. The diamond represents the pooled risk estimate. Inter-study heterogeneity was tested using the Cochran Q statistic (Chi<sup>2</sup>) at a significance level of P < 0.10, and quantified by the I<sup>2</sup> statistic. An I<sup>2</sup> value ≥ 50% is considered to indicate substantial heterogeneity. All results are presented as risk ratios with 95% Confidence Intervals, using the Mantel-Haenszel method with random effects model.

## ONLINE SUPPORTING MATERIAL

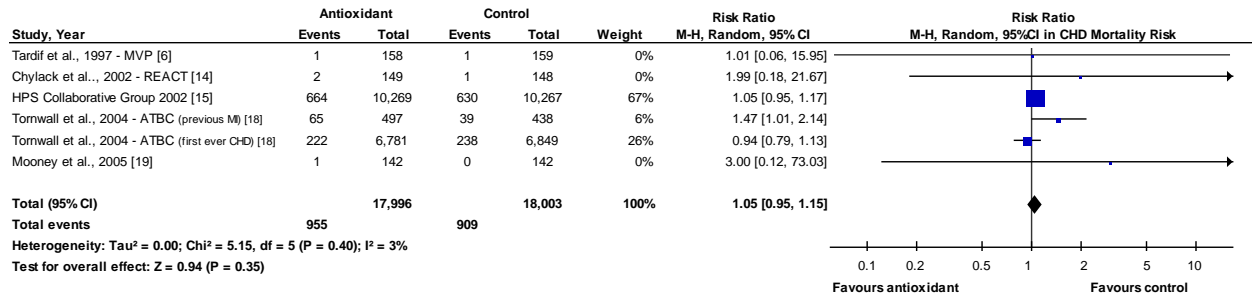

**Supplementary Figure 21. Forest plot of antioxidant supplementation and CHD mortality risk.** M-H, Mantel-Haenszel, CHD, coronary heart disease. The diamond represents the pooled risk estimate. Inter-study heterogeneity was tested using the Cochran Q statistic (Chi<sup>2</sup>) at a significance level of P < 0.10, and quantified by the I<sup>2</sup> statistic. An I<sup>2</sup> value ≥ 50% is considered to indicate substantial heterogeneity. All results are presented as risk ratios with 95% Confidence Intervals, using the Mantel-Haenszel method with random effects model.

## ONLINE SUPPORTING MATERIAL

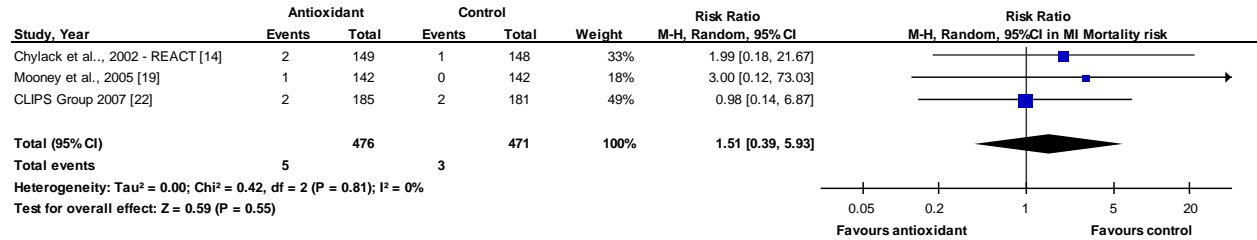

**Supplementary Figure 22. Forest plot of antioxidant supplementation and MI mortality risk.** M-H, Mantel-Haenszel, MI, myocardial infarction. The diamond represents the pooled risk estimate. Inter-study heterogeneity was tested using the Cochran Q statistic (Chi<sup>2</sup>) at a significance level of P < 0.10, and quantified by the I<sup>2</sup> statistic. An I<sup>2</sup> value ≥ 50% is considered to indicate substantial heterogeneity. All results are presented as risk ratios with 95% Confidence Intervals, using the Mantel-Haenszel method with random effects model.

## ONLINE SUPPORTING MATERIAL

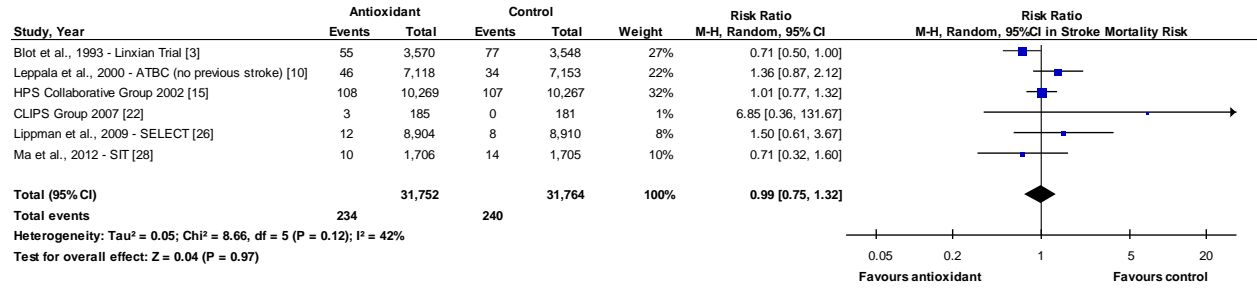

**Supplementary Figure 23. Forest plot of antioxidant supplementation and stroke mortality risk.** M-H, Mantel-Haenszel. The diamond represents the pooled risk estimate. Inter-study heterogeneity was tested using the Cochran Q statistic (Chi<sup>2</sup>) at a significance level of P < 0.10, and quantified by the I<sup>2</sup> statistic. An I<sup>2</sup> value ≥ 50% is considered to indicate substantial heterogeneity. All results are presented as risk ratios with 95% Confidence Intervals, using the Mantel-Haenszel method with random effects model.



## ONLINE SUPPORTING MATERIAL

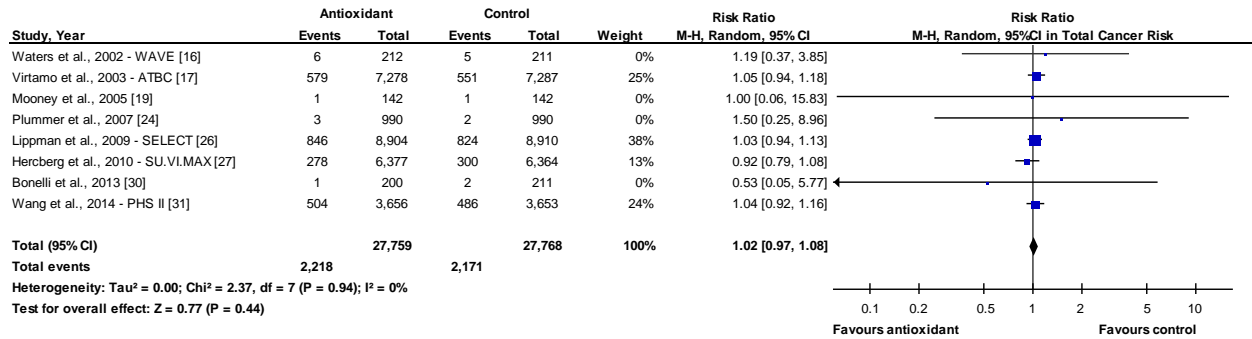

**Supplementary Figure 24. Forest plot of antioxidant supplementation and total cancer risk.** M-H, Mantel-Haenszel. The diamond represents the pooled risk estimate. Inter-study heterogeneity was tested using the Cochran Q statistic (Chi<sup>2</sup>) at a significance level of P < 0.10, and quantified by the I<sup>2</sup> statistic. An I<sup>2</sup> value ≥ 50% is considered to indicate substantial heterogeneity. All results are presented as risk ratios with 95% Confidence Intervals, using the Mantel-Haenszel method with random effects model.

## ONLINE SUPPORTING MATERIAL

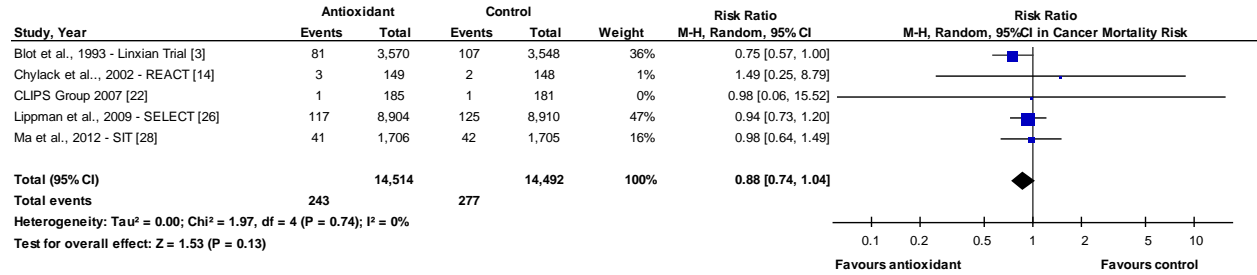

**Supplementary Figure 25. Forest plot of antioxidant supplementation and cancer mortality risk.** M-H, Mantel-Haenszel. The diamond represents the pooled risk estimate. Inter-study heterogeneity was tested using the Cochran Q statistic (Chi<sup>2</sup>) at a significance level of P < 0.10, and quantified by the I<sup>2</sup> statistic. An I<sup>2</sup> value ≥ 50% is considered to indicate substantial heterogeneity. All results are presented as risk ratios with 95% Confidence Intervals, using the Mantel-Haenszel method with random effects model.

ONLINE SUPPORTING MATERIAL

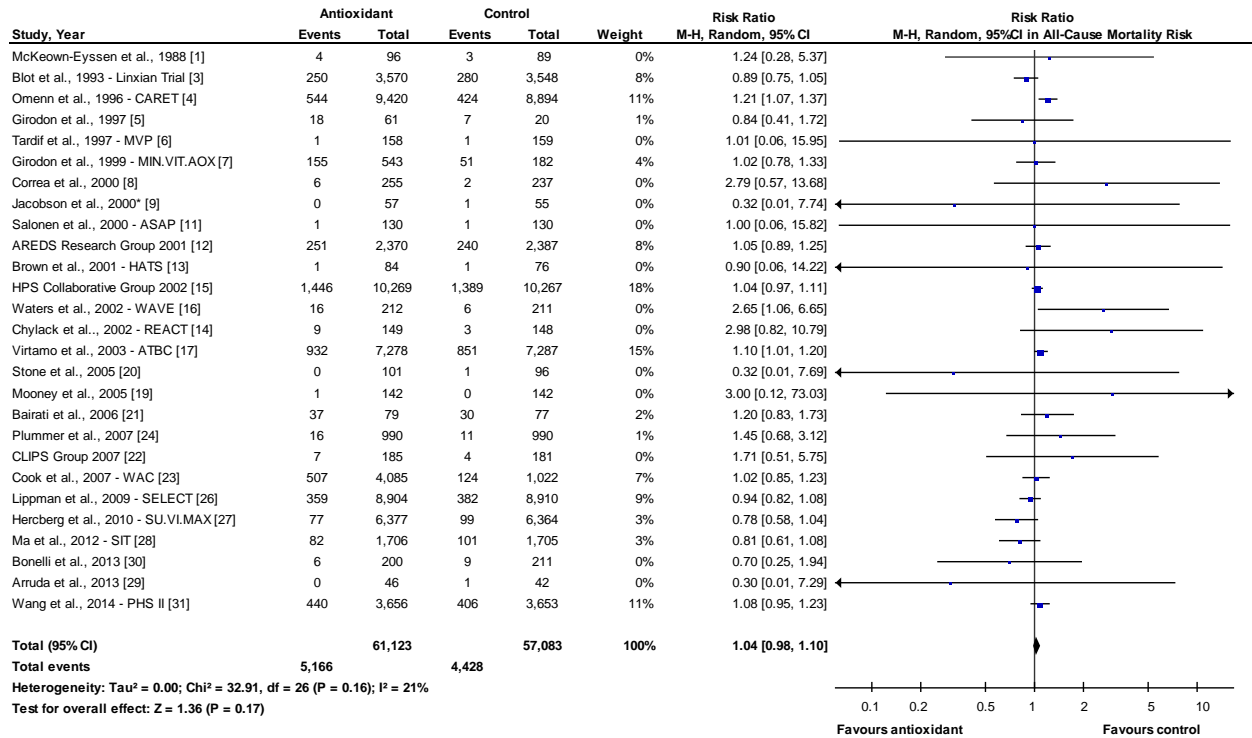

**Supplementary Figure 26. Forest plot of antioxidant supplementation and all-cause mortality risk.** M-H, Mantel-Haenszel. \***Jacobson et al., 2000 – data retrieved from meta-analysis Bjelakovic 2012 (44).** The diamond represents the pooled risk estimate. Inter-study heterogeneity was tested using the Cochran Q statistic (Chi<sup>2</sup>) at a significance level of P < 0.10, and quantified by the I<sup>2</sup> statistic. An I<sup>2</sup> value ≥ 50% is considered to indicate substantial heterogeneity. All results are presented as risk ratios with 95% Confidence Intervals, using the Mantel-Haenszel method with random effects model.

ONLINE SUPPORTING MATERIAL

A. Antioxidant supplementation and total CVD risk

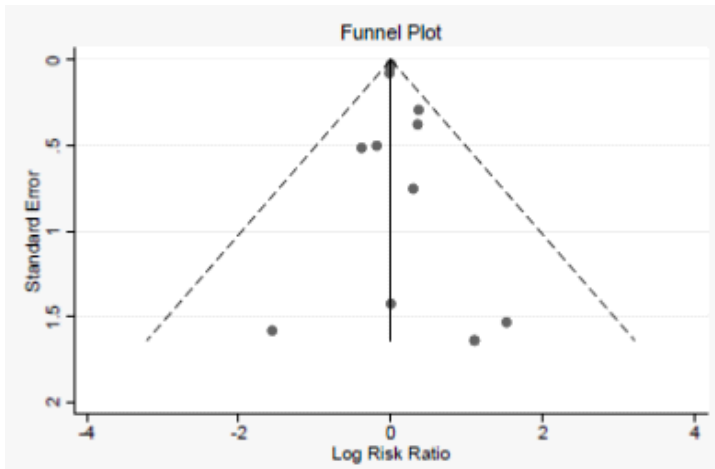

Begg's test = 1.00

Egger's test = 0.29

B. Antioxidant supplementation and MI risk

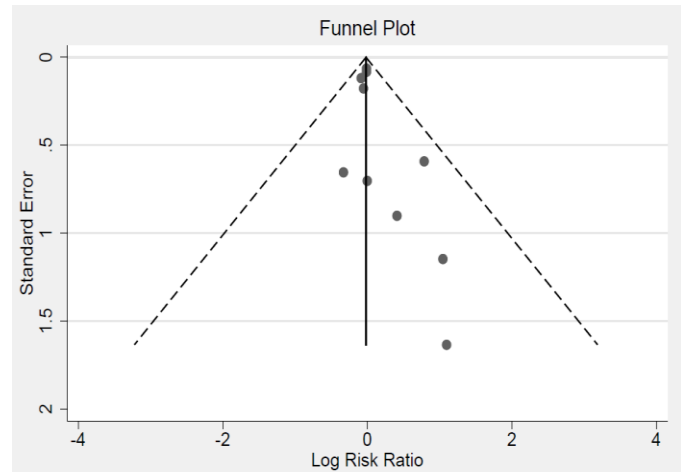

Begg's test = 0.24

Egger's test = 0.12

C. Antioxidant supplementation and stroke risk

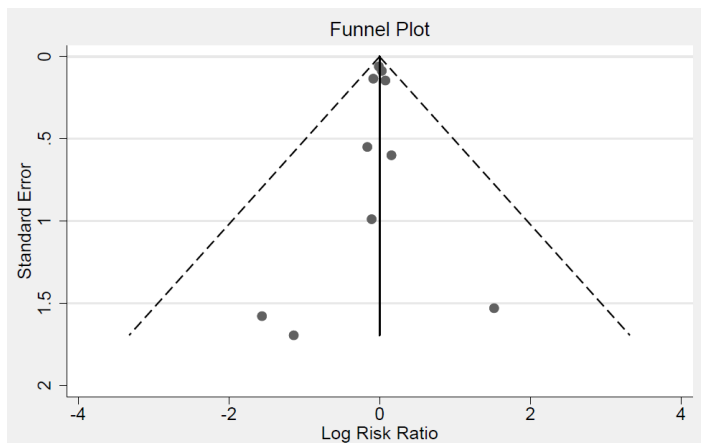

Begg's test = 0.53

Egger's test = 0.66

D. Antioxidant supplementation and CVD mortality

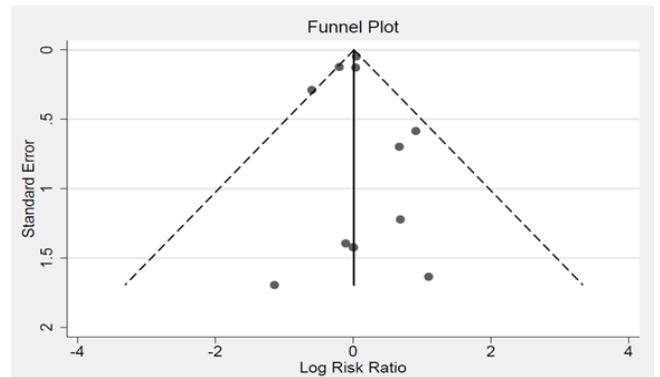

Begg's test = 0.58

Egger's test = 0.99

E. Antioxidant supplementation and all-cause mortality

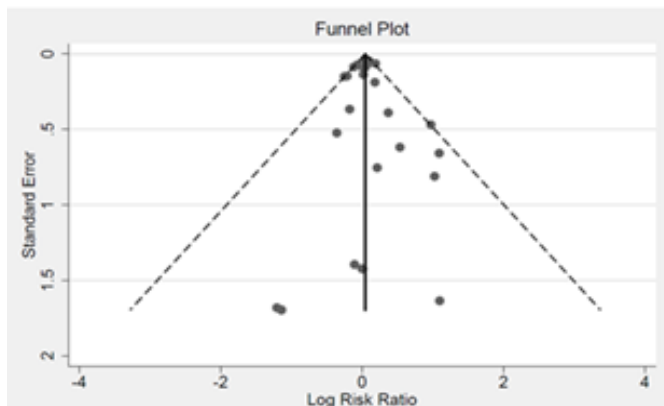

Begg's test = 0.82

Egger's test = 0.95

Supplementary Figure 27. Funnel plots of antioxidant supplementation and total CVD, MI, stroke, CVD mortality, and all-cause mortality risk. Dashed lines represent pseudo – 95% confidence intervals (CI). The circles represent risk estimates for each study, and the horizontal lines represent standard errors of the RR. We were unable to test for funnel plot asymmetry for other CVD and cancer outcomes (<10 RCTs).

## ONLINE SUPPORTING MATERIAL

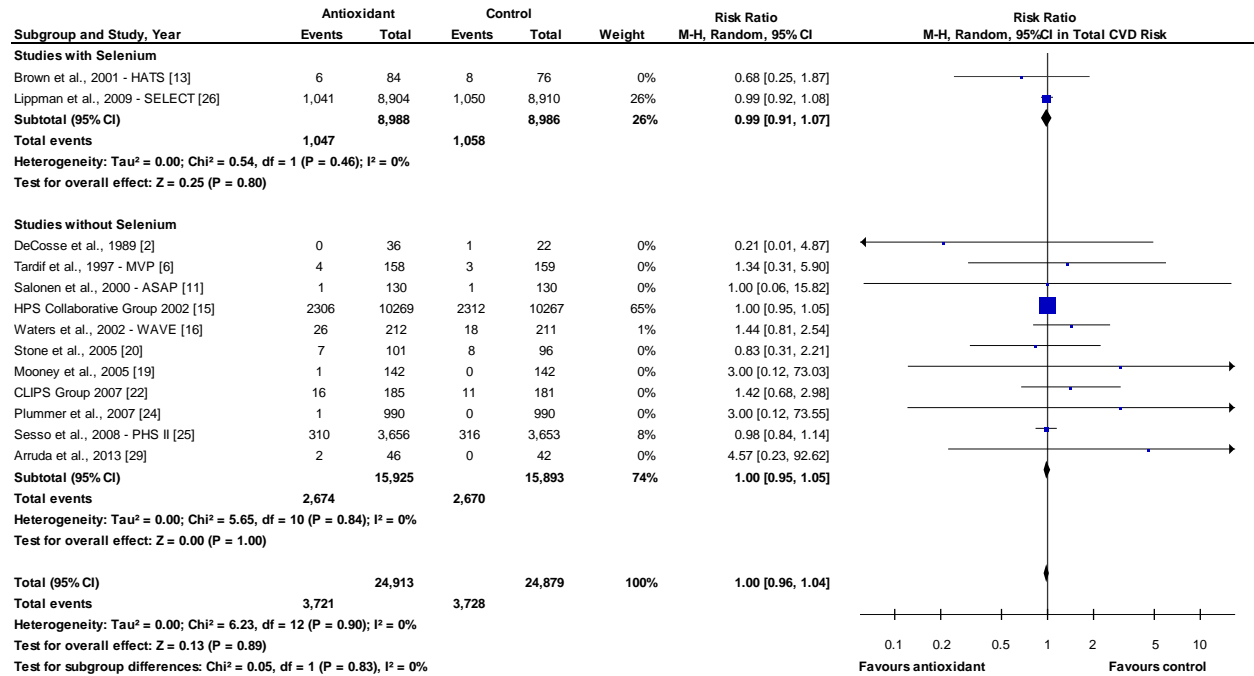

**Supplementary Figure 28. Sensitivity analysis of antioxidant supplementation and total CVD risk for studies with and without selenium.** M-H, Mantel-Haenszel, CVD, cardiovascular disease. The diamond represents the pooled risk estimate. Inter-study heterogeneity was tested using the Cochran Q statistic (Chi<sup>2</sup>) at a significance level of P < 0.10, and quantified by the I<sup>2</sup> statistic. An I<sup>2</sup> value ≥ 50% is considered to indicate substantial heterogeneity. All results are presented as risk ratios with 95% Confidence Intervals, using the Mantel-Haenszel method with random effects model.

## ONLINE SUPPORTING MATERIAL

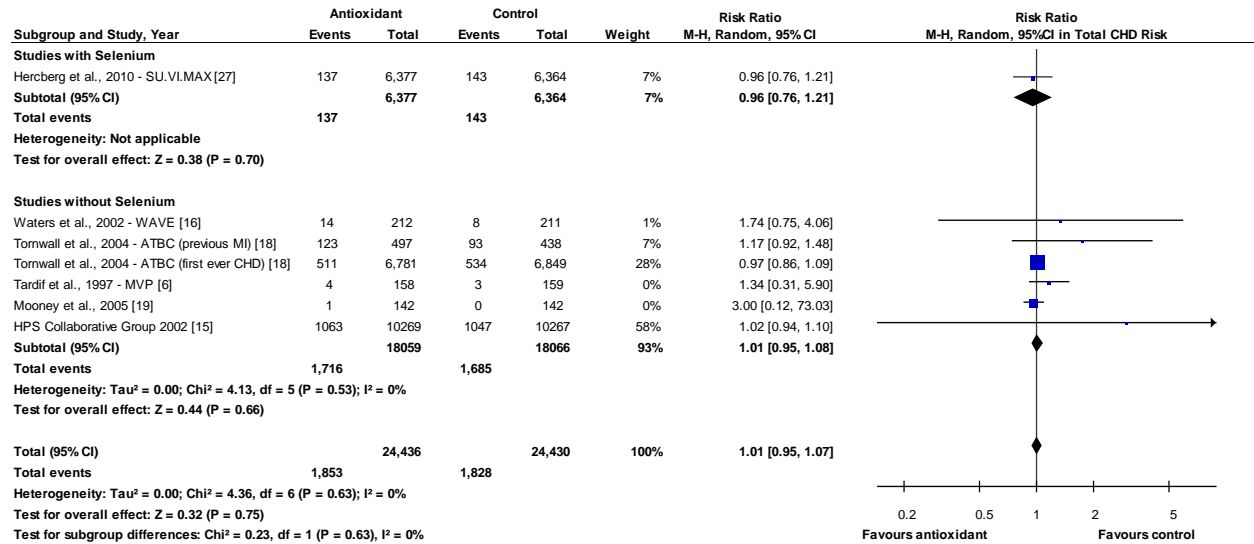

**Supplementary Figure 29. Sensitivity analysis of antioxidant supplementation and total CHD risk for studies with and without selenium.** M-H, Mantel-Haenszel, CHD, coronary heart disease. The diamond represents the pooled risk estimate. Inter-study heterogeneity was tested using the Cochran Q statistic (Chi<sup>2</sup>) at a significance level of P < 0.10, and quantified by the I<sup>2</sup> statistic. An I<sup>2</sup> value ≥ 50% is considered to indicate substantial heterogeneity. All results are presented as risk ratios with 95% Confidence Intervals, using the Mantel-Haenszel method with random effects model.

## ONLINE SUPPORTING MATERIAL

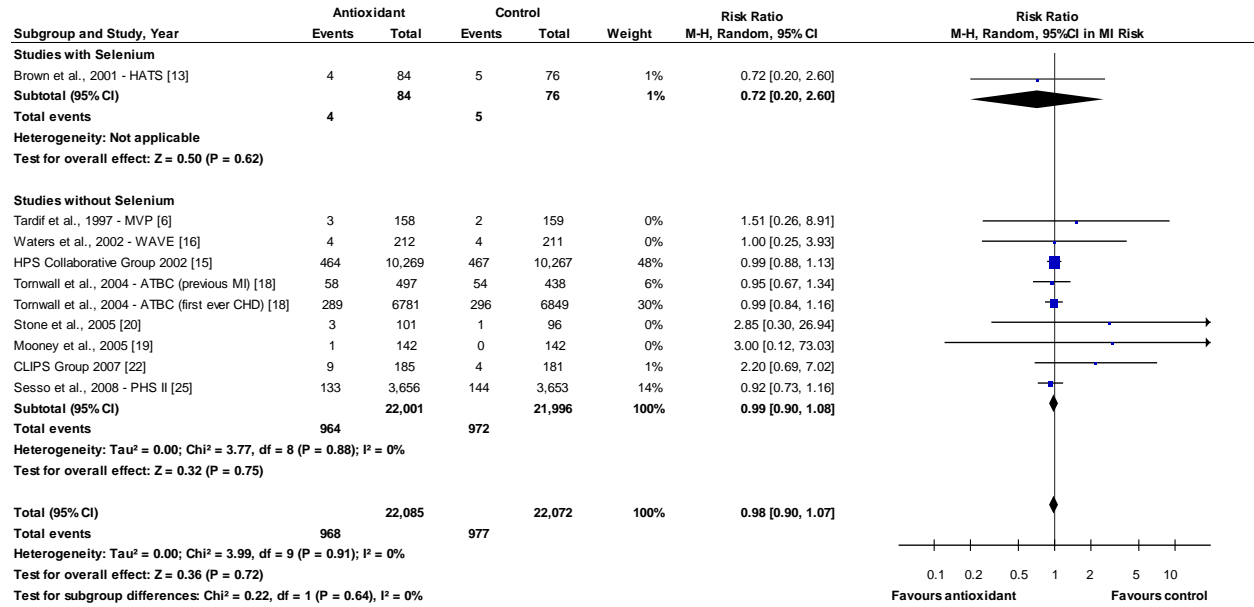

**Supplementary Figure 30. Sensitivity analysis of antioxidant supplementation and MI risk for studies with and without selenium.** M-H, Mantel-Haenszel, MI, myocardial infarction.

The diamond represents the pooled risk estimate. Inter-study heterogeneity was tested using the Cochran Q statistic (Chi<sup>2</sup>) at a significance level of P < 0.10, and quantified by the I<sup>2</sup> statistic. An I<sup>2</sup> value ≥ 50% is considered to indicate substantial heterogeneity. All results are presented as risk ratios with 95% Confidence Intervals, using the Mantel-Haenszel method with random effects model.

## ONLINE SUPPORTING MATERIAL

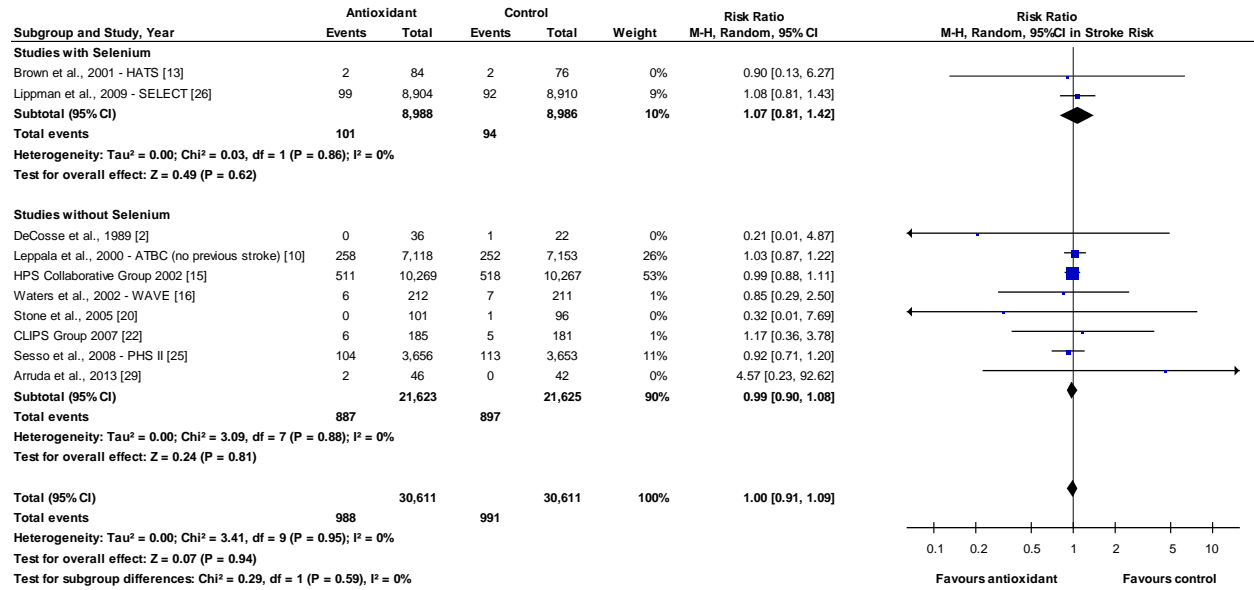

**Supplementary Figure 31. Sensitivity analysis of antioxidant supplementation and stroke risk for studies with and without selenium.** M-H, Mantel-Haenszel. The diamond represents the pooled risk estimate. Inter-study heterogeneity was tested using the Cochran Q statistic (Chi<sup>2</sup>) at a significance level of P < 0.10, and quantified by the I<sup>2</sup> statistic. An I<sup>2</sup> value ≥ 50% is considered to indicate substantial heterogeneity. All results are presented as risk ratios with 95% Confidence Intervals, using the Mantel-Haenszel method with random effects model.



## ONLINE SUPPORTING MATERIAL

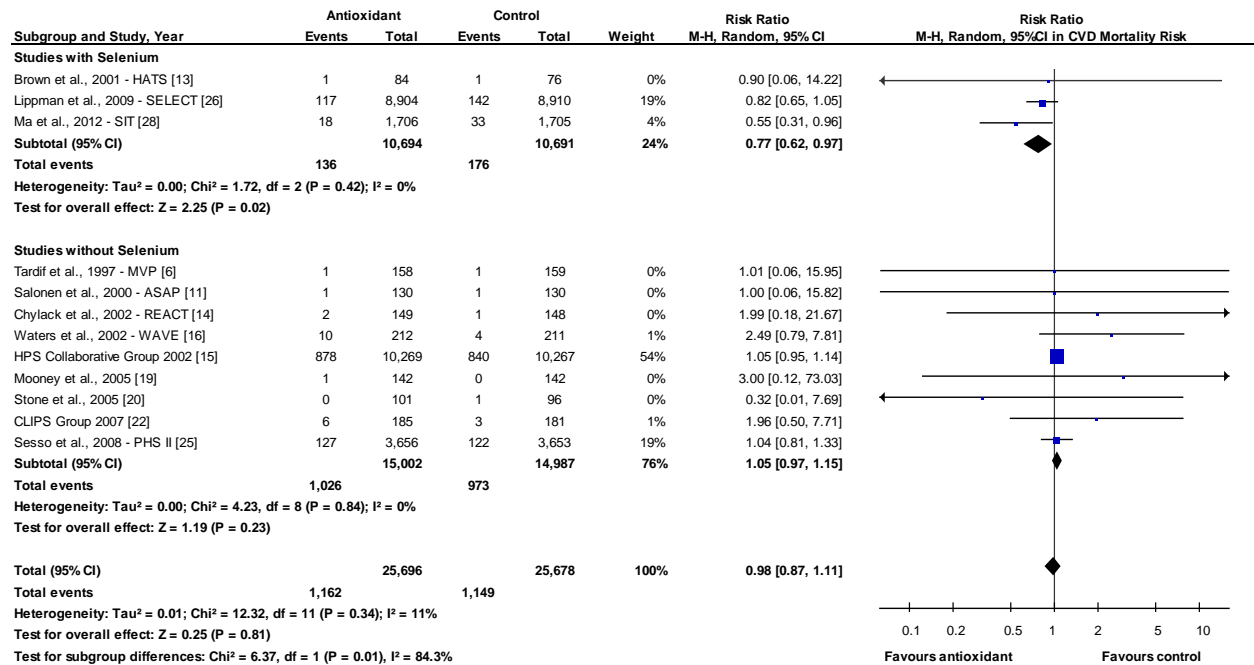

**Supplementary Figure 32. Sensitivity analysis of antioxidant supplementation and CVD mortality risk for studies with and without selenium.** NNT for antioxidant supplementation and CVD mortality risk for studies with selenium is 264. M-H, Mantel-Haenszel, CVD, cardiovascular disease. The diamond represents the pooled risk estimate. Inter-study heterogeneity was tested using the Cochran Q statistic (Chi<sup>2</sup>) at a significance level of P < 0.10, and quantified by the I<sup>2</sup> statistic. An I<sup>2</sup> value ≥ 50% is considered to indicate substantial heterogeneity. All results are presented as risk ratios with 95% Confidence Intervals, using the Mantel-Haenszel method with random effects model.

## ONLINE SUPPORTING MATERIAL

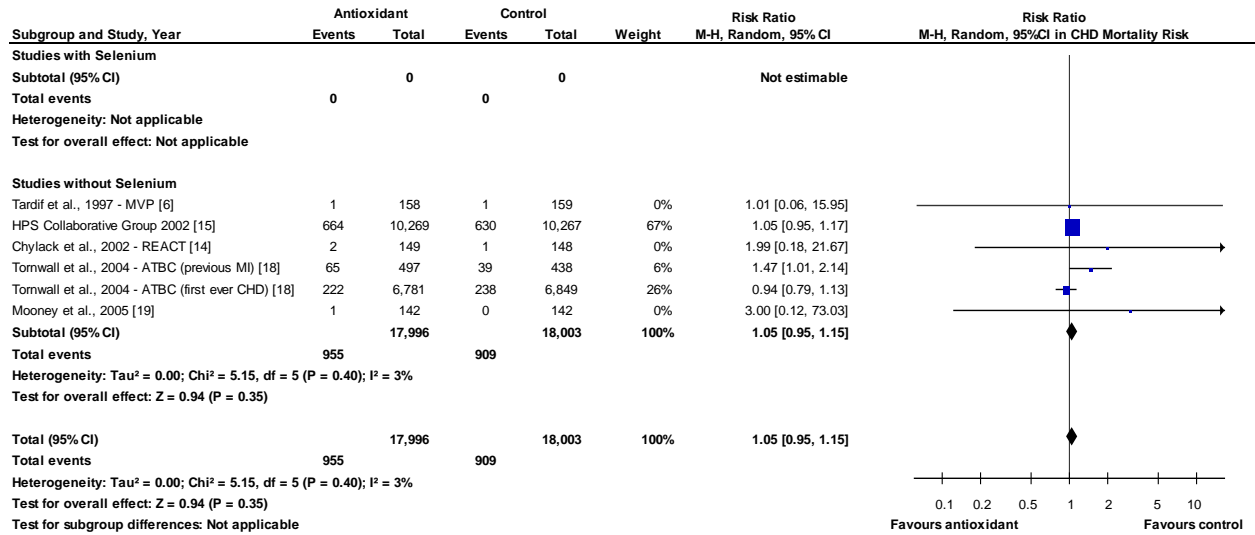

**Supplementary Figure 33. Sensitivity analysis of antioxidant supplementation and CHD mortality risk for studies with and without selenium.** M-H, Mantel-Haenszel, CHD, coronary heart disease. The diamond represents the pooled risk estimate. Inter-study heterogeneity was tested using the Cochran Q statistic (Chi<sup>2</sup>) at a significance level of P < 0.10, and quantified by the I<sup>2</sup> statistic. An I<sup>2</sup> value ≥ 50% is considered to indicate substantial heterogeneity. All results are presented as risk ratios with 95% Confidence Intervals, using the Mantel-Haenszel method with random effects model.

## ONLINE SUPPORTING MATERIAL

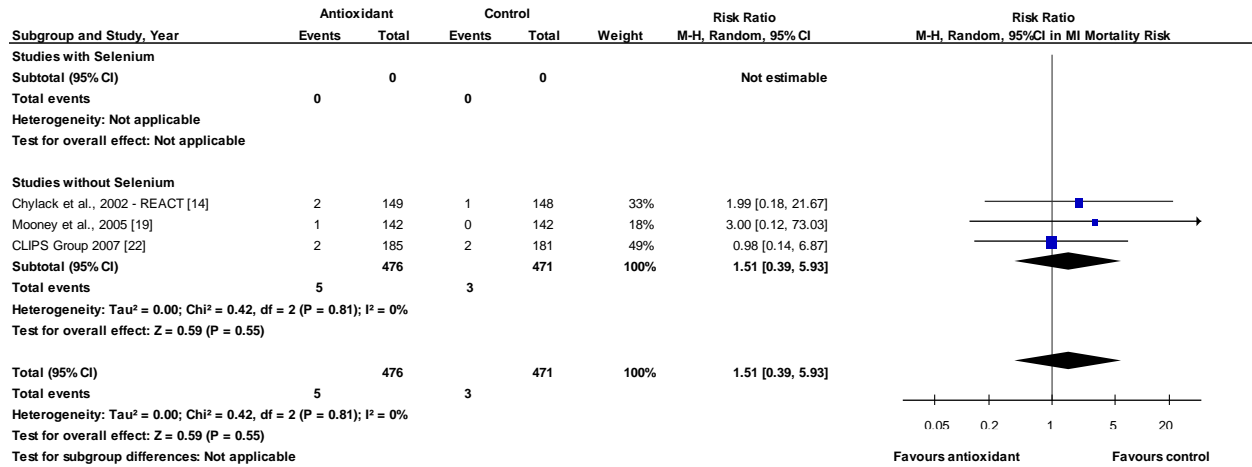

**Supplementary Figure 34. Sensitivity analysis of antioxidant supplementation and MI mortality risk for studies with and without selenium.** M-H, Mantel-Haenszel, MI, myocardial infarction. The diamond represents the pooled risk estimate. Inter-study heterogeneity was tested using the Cochran Q statistic (Chi<sup>2</sup>) at a significance level of P < 0.10, and quantified by the I<sup>2</sup> statistic. An I<sup>2</sup> value ≥ 50% is considered to indicate substantial heterogeneity. All results are presented as risk ratios with 95% Confidence Intervals, using the Mantel-Haenszel method with random effects model.

## ONLINE SUPPORTING MATERIAL

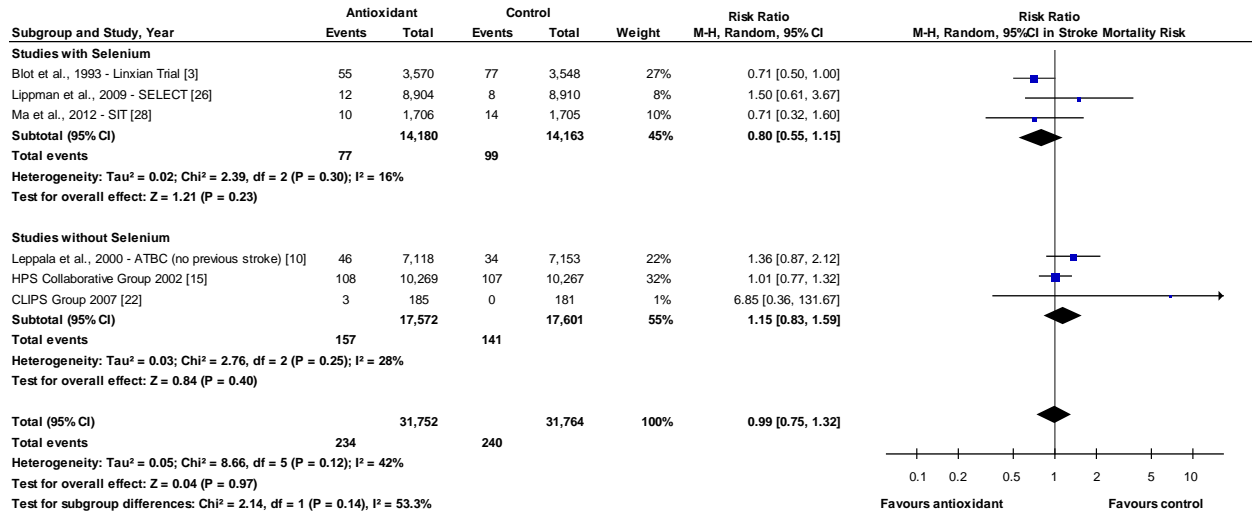

**Supplementary Figure 35. Sensitivity analysis of antioxidant supplementation and stroke mortality risk for studies with and without selenium.** M-H, Mantel-Haenszel. The diamond represents the pooled risk estimate. Inter-study heterogeneity was tested using the Cochran Q statistic (Chi<sup>2</sup>) at a significance level of P < 0.10, and quantified by the I<sup>2</sup> statistic. An I<sup>2</sup> value ≥ 50% is considered to indicate substantial heterogeneity. All results are presented as risk ratios with 95% Confidence Intervals, using the Mantel-Haenszel method with random effects model.

## ONLINE SUPPORTING MATERIAL

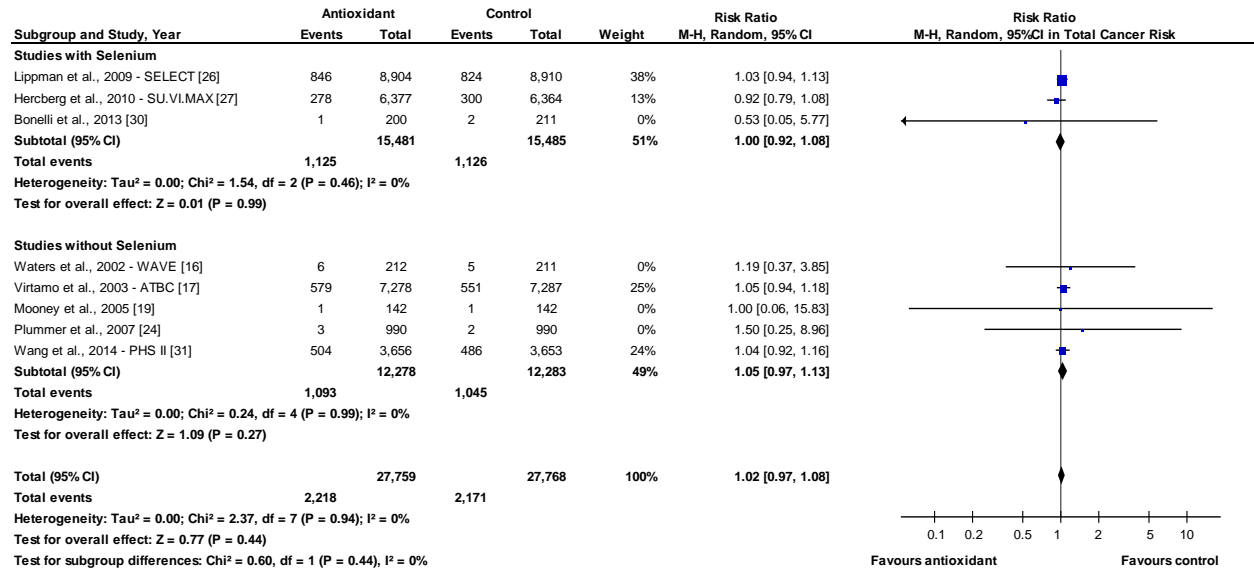

**Supplementary Figure 36. Sensitivity analysis of antioxidant supplementation and total cancer risk for studies with and without selenium.** M-H, Mantel-Haenszel. The diamond represents the pooled risk estimate. Inter-study heterogeneity was tested using the Cochran Q statistic (Chi<sup>2</sup>) at a significance level of P < 0.10, and quantified by the I<sup>2</sup> statistic. An I<sup>2</sup> value ≥ 50% is considered to indicate substantial heterogeneity. All results are presented as risk ratios with 95% Confidence Intervals, using the Mantel-Haenszel method with random effects model.

## ONLINE SUPPORTING MATERIAL

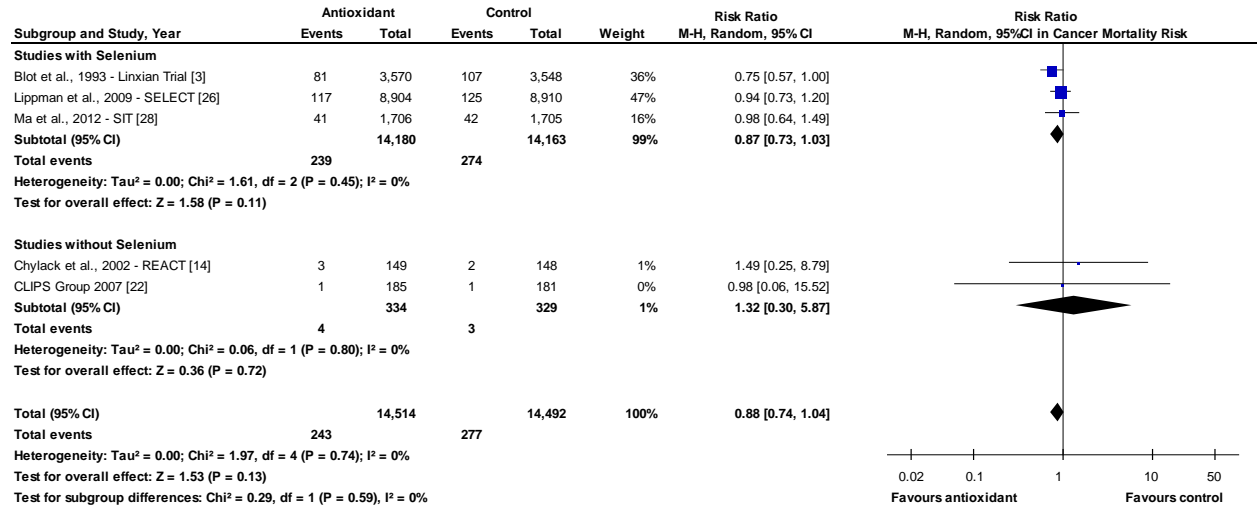

**Supplementary Figure 37. Sensitivity analysis of antioxidant supplementation and cancer mortality risk for studies with and without selenium.** M-H, Manthel-Haenszel. The diamond represents the pooled risk estimate. Inter-study heterogeneity was tested using the Cochran Q statistic (Chi<sup>2</sup>) at a significance level of P < 0.10, and quantified by the I<sup>2</sup> statistic. An I<sup>2</sup> value ≥ 50% is considered to indicate substantial heterogeneity. All results are presented as risk ratios with 95% Confidence Intervals, using the Manthel-Haenszel method with random effects model.

## ONLINE SUPPORTING MATERIAL

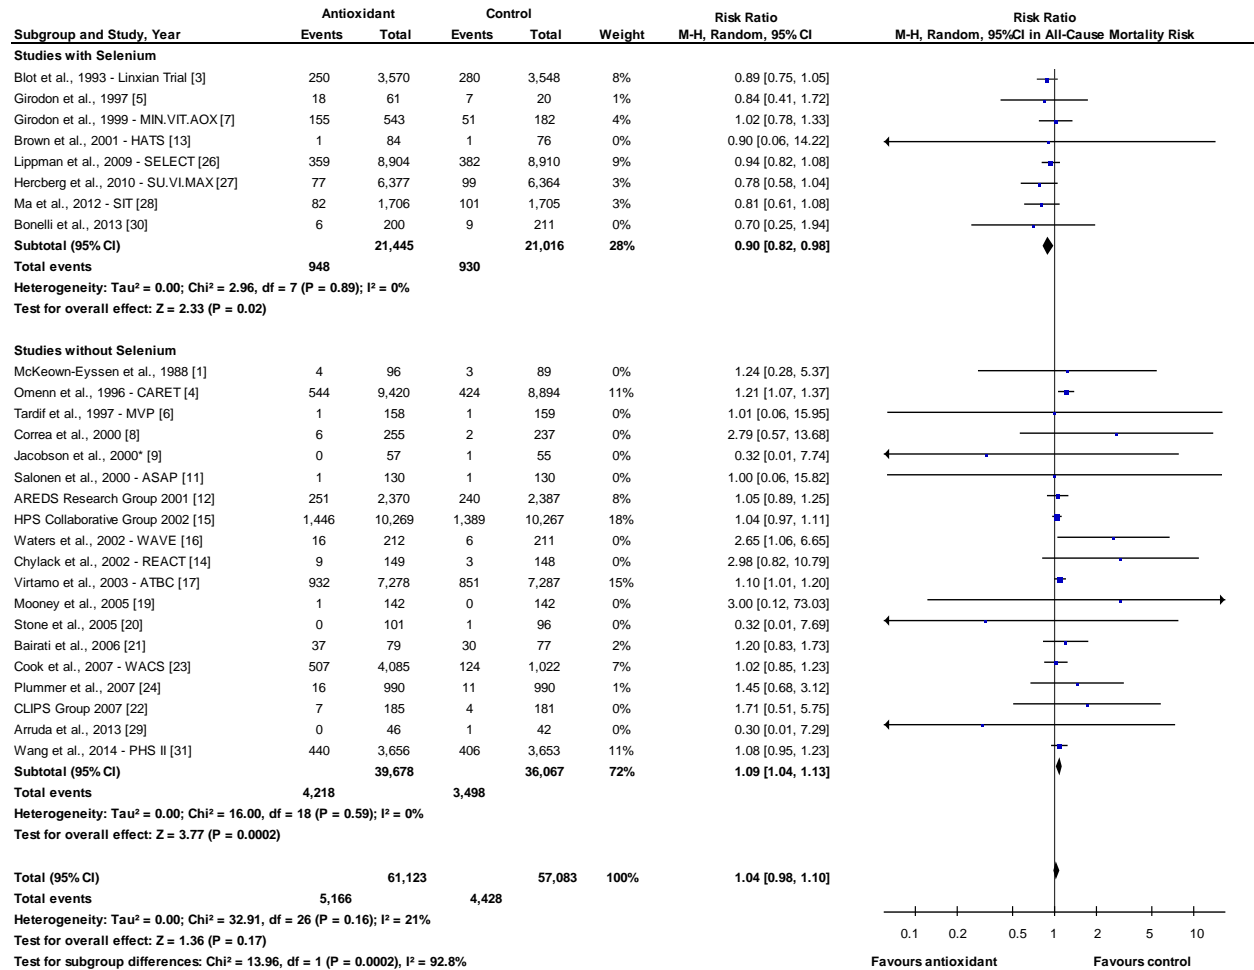

### Supplementary Figure 38. Sensitivity analysis of antioxidant supplementation and all-cause mortality risk for studies with and without selenium. NNT for antioxidant supplementation and all-cause mortality risk for studies with selenium is 226. NNH for antioxidant supplementation and all-cause mortality risk for studies without selenium is 115. M-H, Mantel-Haenszel. \*Jacobson et al., 2000 – Data retrieved from meta-analysis Bjelakovic 2012 (44). The diamond represents the pooled risk estimate. Inter-study heterogeneity was tested using the Cochran Q statistic (Chi<sup>2</sup>) at a significance level of P < 0.10, and quantified by the I<sup>2</sup> statistic. An I<sup>2</sup> value ≥ 50% is considered to indicate substantial heterogeneity. All results are presented as risk ratios with 95% Confidence Intervals, using the Mantel-Haenszel method with random effects model.

Supplementary Figure 38. Sensitivity analysis of antioxidant supplementation and all-cause mortality risk for studies with and without selenium. NNT for antioxidant supplementation and all-cause mortality risk for studies with selenium is 226. NNH for antioxidant supplementation and all-cause mortality risk for studies without selenium is 115. M-H, Mantel-Haenszel. \*Jacobson et al., 2000 – Data retrieved from meta-analysis Bjelakovic 2012 (44). The diamond represents the pooled risk estimate. Inter-study heterogeneity was tested using the Cochran Q statistic (Chi<sup>2</sup>) at a significance level of P < 0.10, and quantified by the I<sup>2</sup> statistic. An I<sup>2</sup> value ≥ 50% is considered to indicate substantial heterogeneity. All results are presented as risk ratios with 95% Confidence Intervals, using the Mantel-Haenszel method with random effects model.

## ONLINE SUPPORTING MATERIAL

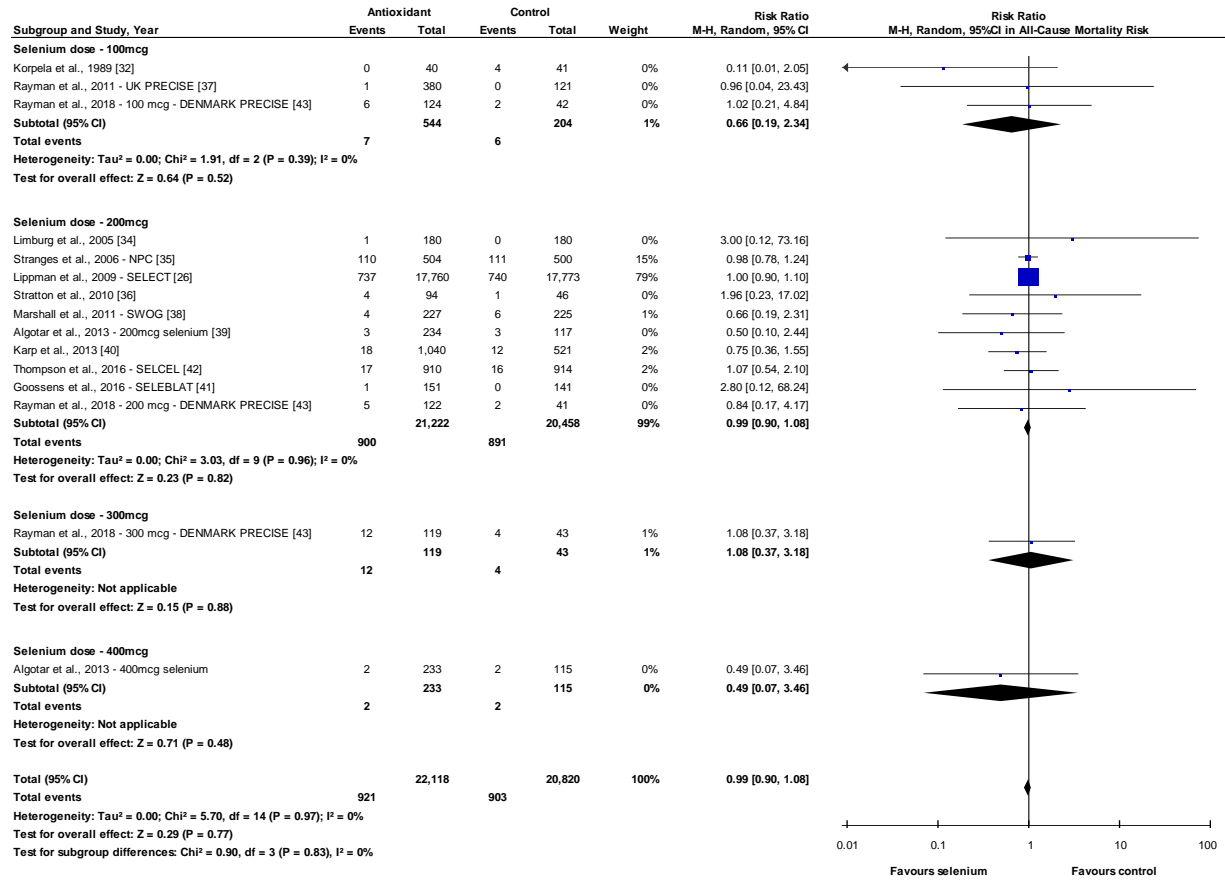

**Supplementary Figure 39.** Forest plot showing the dose response analysis of selenium supplementation only and all-cause mortality. M-H, Mantel-Haenszel. **\*Stranges et al., 2006 was used as it contained data up until the end of treatment but only in those free of CVD at baseline(35).** The diamond represents the pooled risk estimate. Inter-study heterogeneity was tested using the Cochran Q statistic (Chi<sup>2</sup>) at a significance level of P < 0.10, and quantified by the I<sup>2</sup> statistic. An I<sup>2</sup> value ≥ 50% is considered to indicate substantial heterogeneity. All results are presented as risk ratios with 95% Confidence Intervals, using the Mantel-Haenszel method with random effects model.



## ONLINE SUPPORTING MATERIAL

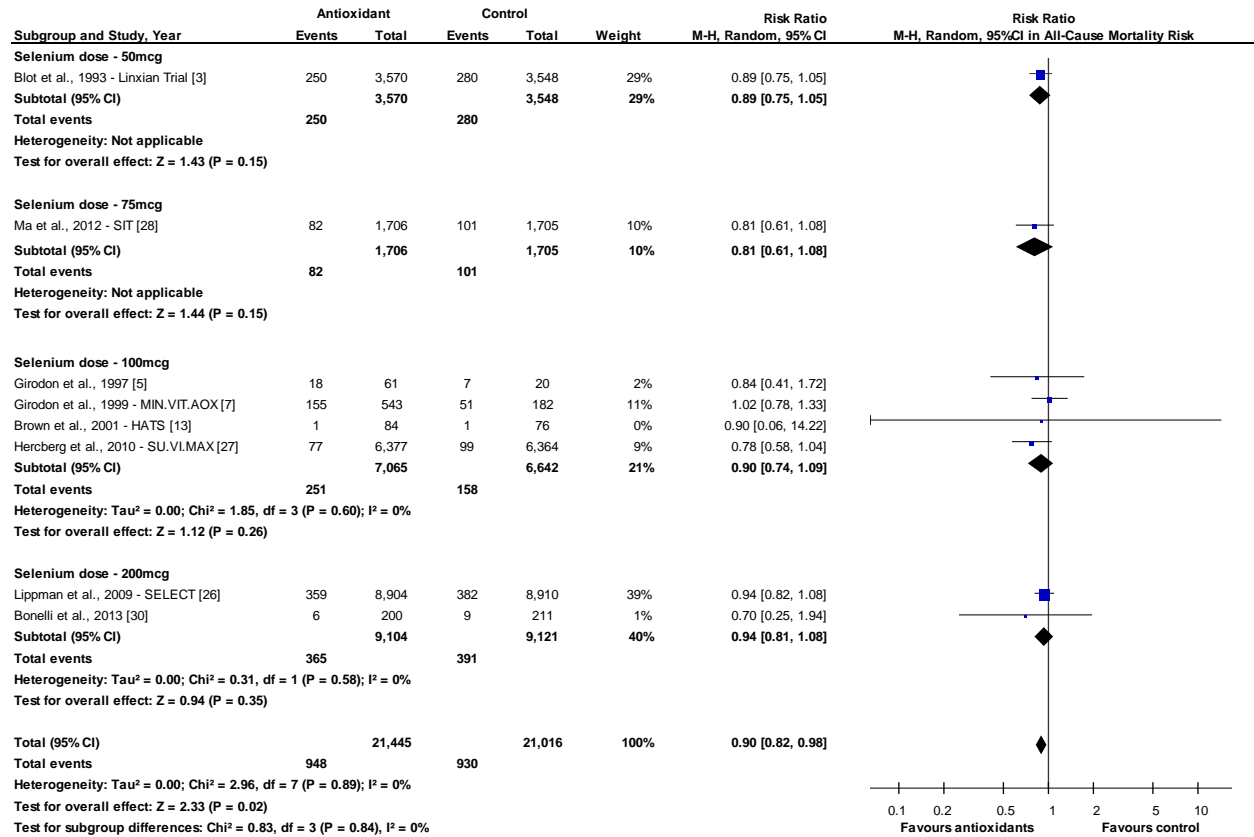

**Supplementary Figure 40.** Forest plot showing the dose response analysis of antioxidant supplementation for studies with selenium and all-cause mortality. M-H, Mantel-Haenszel. The diamond represents the pooled risk estimate. Inter-study heterogeneity was tested using the Cochran Q statistic (Chi<sup>2</sup>) at a significance level of P < 0.10, and quantified by the I<sup>2</sup> statistic. An I<sup>2</sup> value ≥ 50% is considered to indicate substantial heterogeneity. All results are presented as risk ratios with 95% Confidence Intervals, using the Mantel-Haenszel method with random effects model.

## ONLINE SUPPORTING MATERIAL

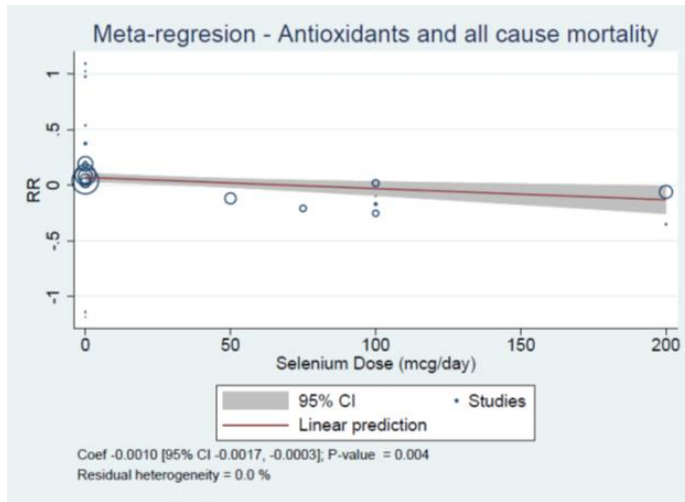

**Supplementary Figure 41.** Linear dose-response relationship between selenium intake and all-cause mortality risk in studies with antioxidant intake. Individual studies are represented by the circles, with their weight in the overall analysis represented by the size of the circles. The straight red line represents the estimate linear dose response and the grey area represent the upper and lower 95% Confidence Intervals.

## ONLINE SUPPORTING MATERIAL

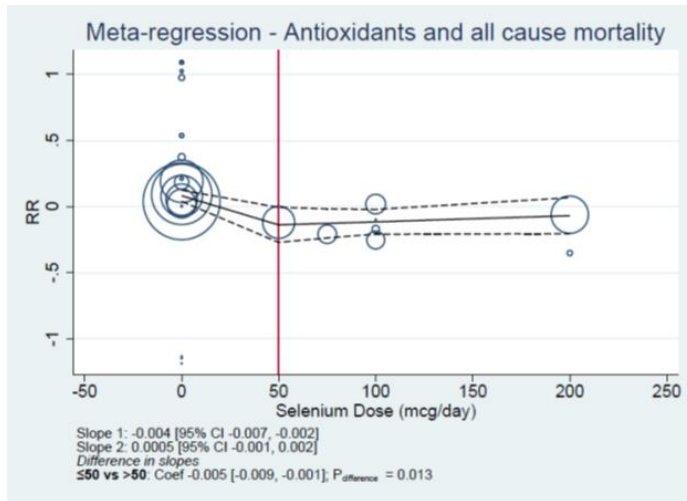

**Supplementary Figure 42.** Non-linear dose-response relationship between selenium intake and all-cause mortality risk in studies with antioxidant intake. Individual studies are represented by the circles, with their weight in the overall analysis represented by the size of the circles. The straight lines represent the estimate dose response and the dashed lines represent the upper and lower 95% Confidence Intervals. The red line represents the knot at 50 mcg/day of selenium.

## ONLINE SUPPORTING MATERIAL

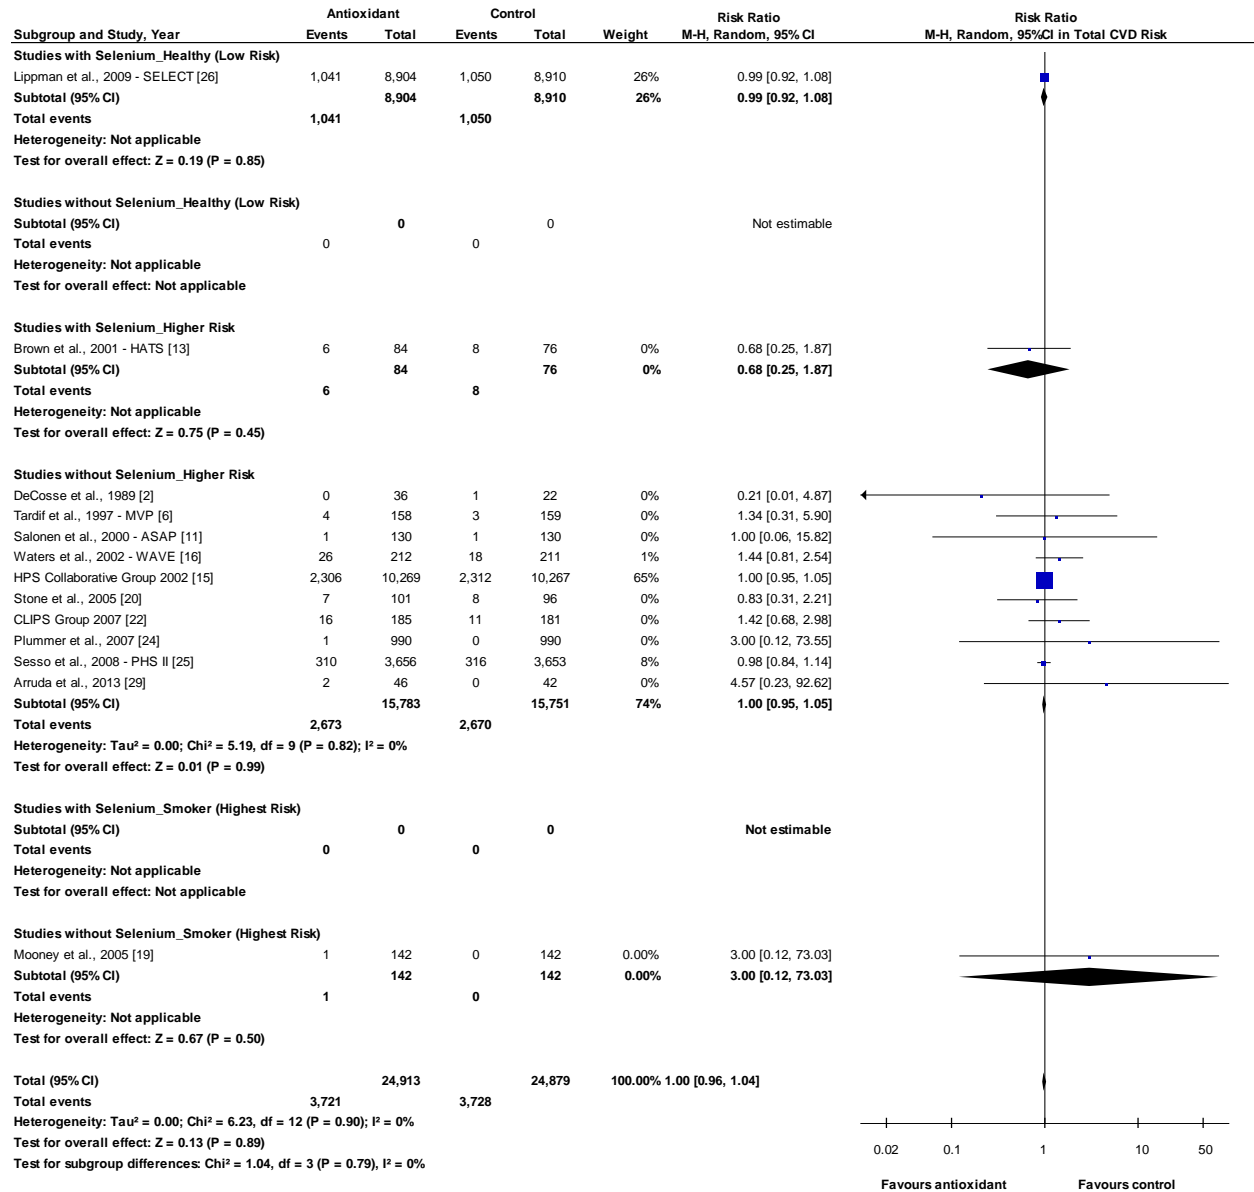

**Supplementary Figure 43. Forest plot showing antioxidants (with and without selenium) and total CVD by risk group.** M-H, Mantel-Haenszel. The diamond represents the pooled risk estimate. Inter-study heterogeneity was tested using the Cochran Q statistic (Chi<sup>2</sup>) at a significance level of P < 0.10, and quantified by the I<sup>2</sup> statistic. An I<sup>2</sup> value ≥ 50% is considered to indicate substantial heterogeneity. All results are presented as risk ratios with 95% Confidence Intervals, using the Mantel-Haenszel method with random effects model.

## ONLINE SUPPORTING MATERIAL

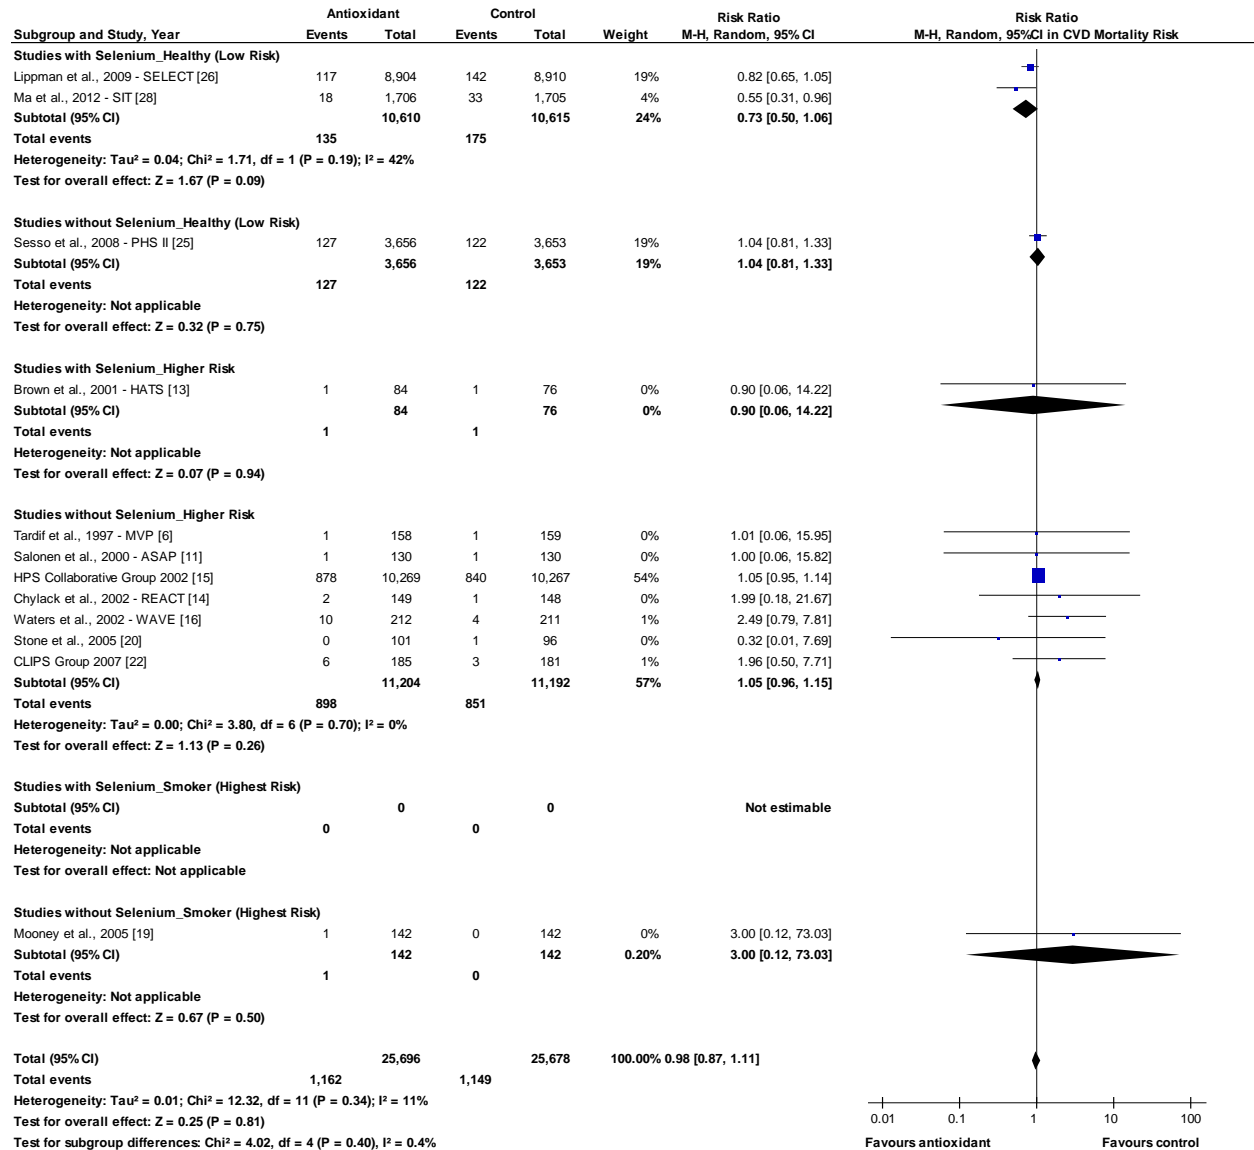

**Supplementary Figure 44. Forest plot showing antioxidants (with and without selenium) and total CVD mortality by risk group.** M-H, Mantel-Haenszel. The diamond represents the pooled risk estimate. Inter-study heterogeneity was tested using the Cochran Q statistic (Chi<sup>2</sup>) at a significance level of P < 0.10, and quantified by the I<sup>2</sup> statistic. An I<sup>2</sup> value ≥ 50% is considered to indicate substantial heterogeneity. All results are presented as risk ratios with 95% Confidence Intervals, using the Mantel-Haenszel method with random effects model.

## ONLINE SUPPORTING MATERIAL

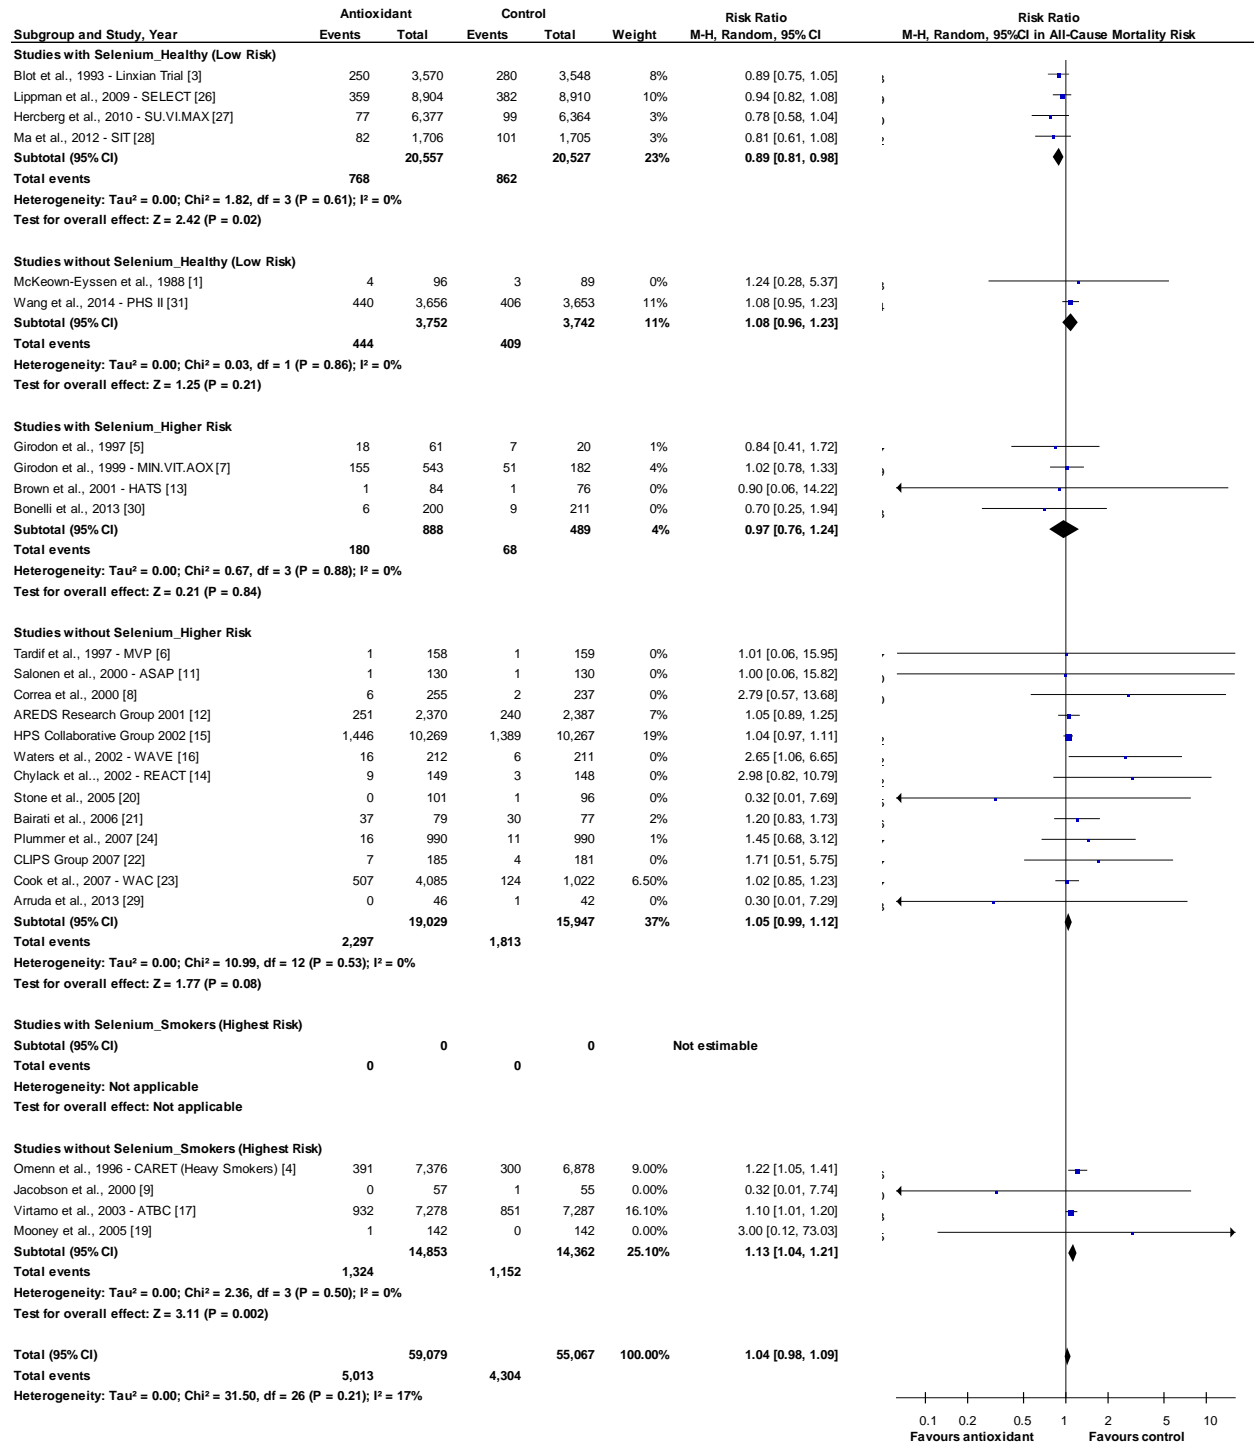

**Supplementary Figure 45. Forest plot showing antioxidants (with and without selenium) and all-cause mortality by risk group. M-H, Mantel-Haenszel. \*Jacobson et al., 2000 – data retrieved from meta-analysis Bjelakovic 2012(44).** The diamond represents the pooled risk estimate. Inter-study heterogeneity was tested using the Cochran Q statistic (Chi<sup>2</sup>) at a significance level of P < 0.10, and quantified by the I<sup>2</sup> statistic. An I<sup>2</sup> value ≥ 50% is considered to indicate substantial heterogeneity. All results are presented as risk ratios with 95% Confidence Intervals, using the Mantel-Haenszel method with random effects model. The sub

## ONLINE SUPPORTING MATERIAL

group difference between studies with and without selenium among the healthy (low risk) group was significant ( $p = 0.01$ ,  $I^2 = 83.4\%$ ) while the subgroup difference within the higher risk group was not significant ( $p = 0.54$ ,  $I^2 = 0\%$ ).

## ONLINE SUPPORTING MATERIAL

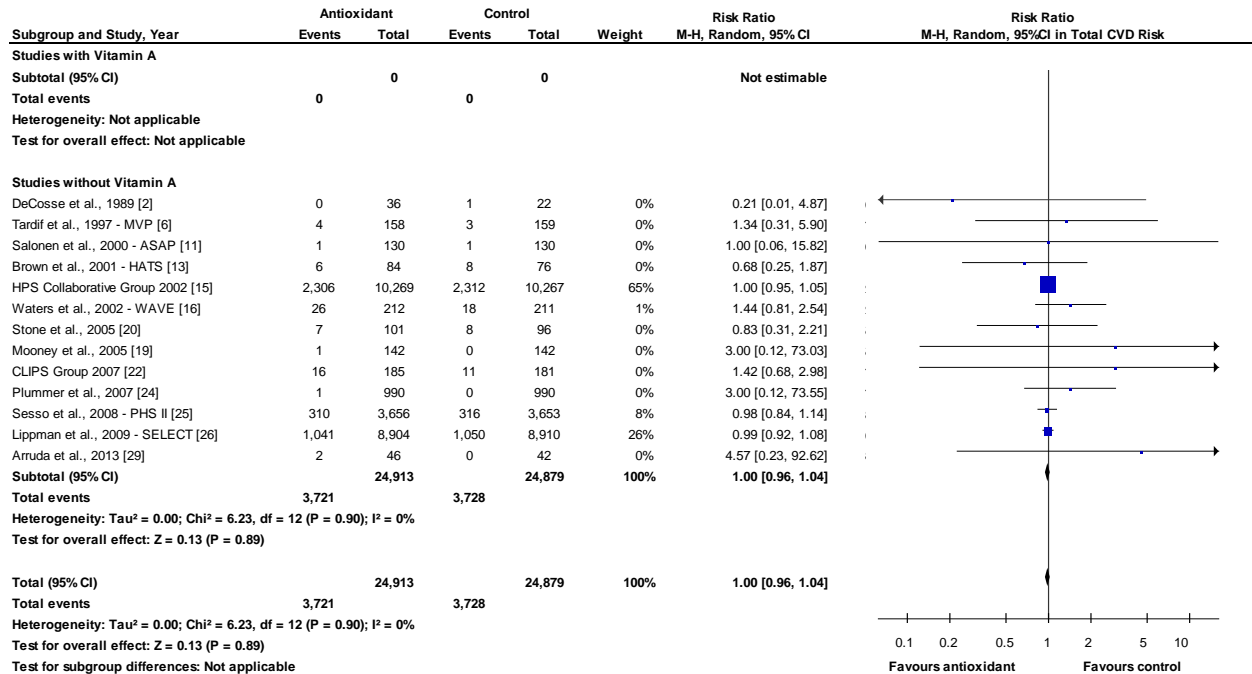

**Supplementary Figure 46. Sensitivity analysis of antioxidant supplementation and total CVD risk for studies with and without vitamin A.** M-H, Mantel-Haenszel, CVD, cardiovascular disease. The diamond represents the pooled risk estimate. Inter-study heterogeneity was tested using the Cochran Q statistic (Chi<sup>2</sup>) at a significance level of P < 0.10, and quantified by the I<sup>2</sup> statistic. An I<sup>2</sup> value ≥ 50% is considered to indicate substantial heterogeneity. All results are presented as risk ratios with 95% Confidence Intervals, using the Mantel-Haenszel method with random effects model.



## ONLINE SUPPORTING MATERIAL

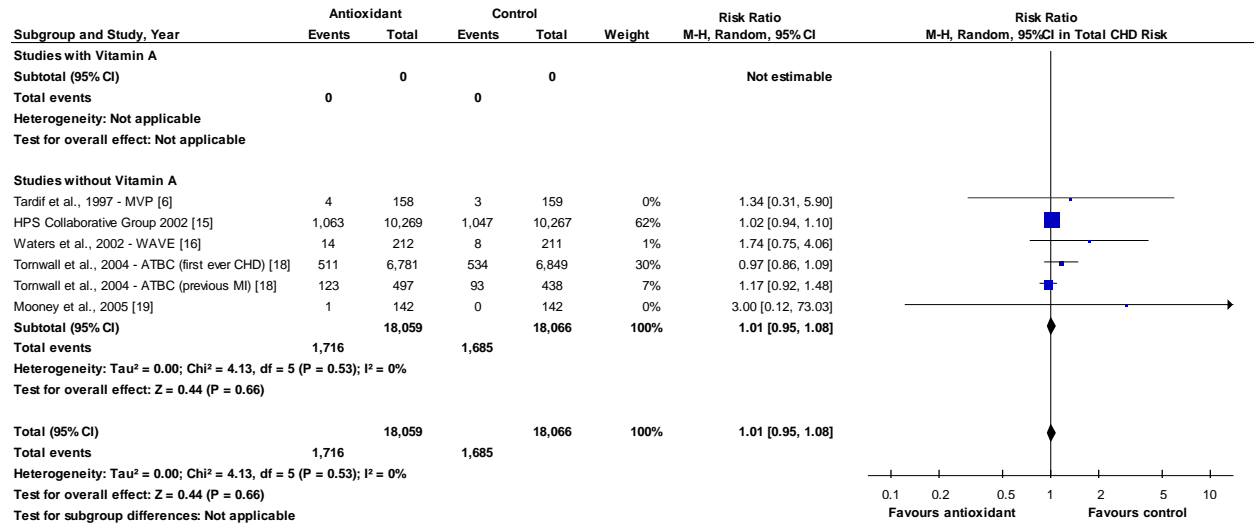

**Supplementary Figure 47. Sensitivity analysis of antioxidant supplementation and total CHD risk for studies with and without vitamin A.** M-H, Mantel-Haenszel, CHD, coronary heart disease. The diamond represents the pooled risk estimate. Inter-study heterogeneity was tested using the Cochran Q statistic (Chi<sup>2</sup>) at a significance level of P < 0.10, and quantified by the I<sup>2</sup> statistic. An I<sup>2</sup> value ≥ 50% is considered to indicate substantial heterogeneity. All results are presented as risk ratios with 95% Confidence Intervals, using the Mantel-Haenszel method with random effects model.

## ONLINE SUPPORTING MATERIAL

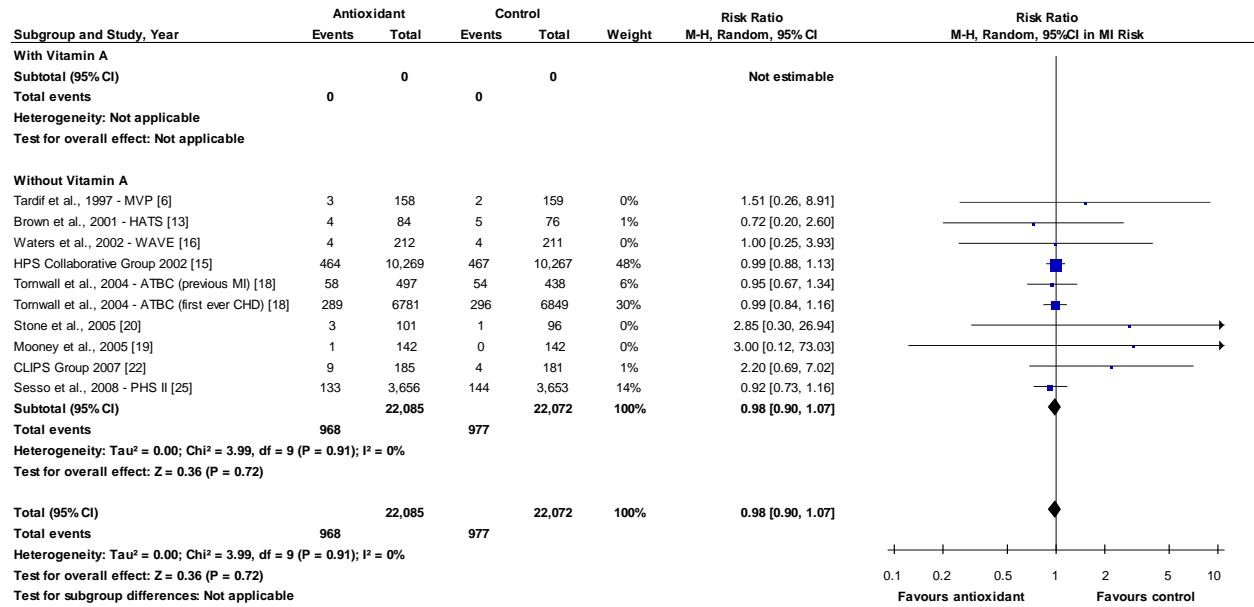

**Supplementary Figure 48. Sensitivity analysis of antioxidant supplementation and MI risk for studies with and without vitamin A.** M-H, Mantel-Haenszel, MI, myocardial infarction. The diamond represents the pooled risk estimate. Inter-study heterogeneity was tested using the Cochran Q statistic (Chi<sup>2</sup>) at a significance level of P < 0.10, and quantified by the I<sup>2</sup> statistic. An I<sup>2</sup> value ≥ 50% is considered to indicate substantial heterogeneity. All results are presented as risk ratios with 95% Confidence Intervals, using the Mantel-Haenszel method with random effects model.

## ONLINE SUPPORTING MATERIAL

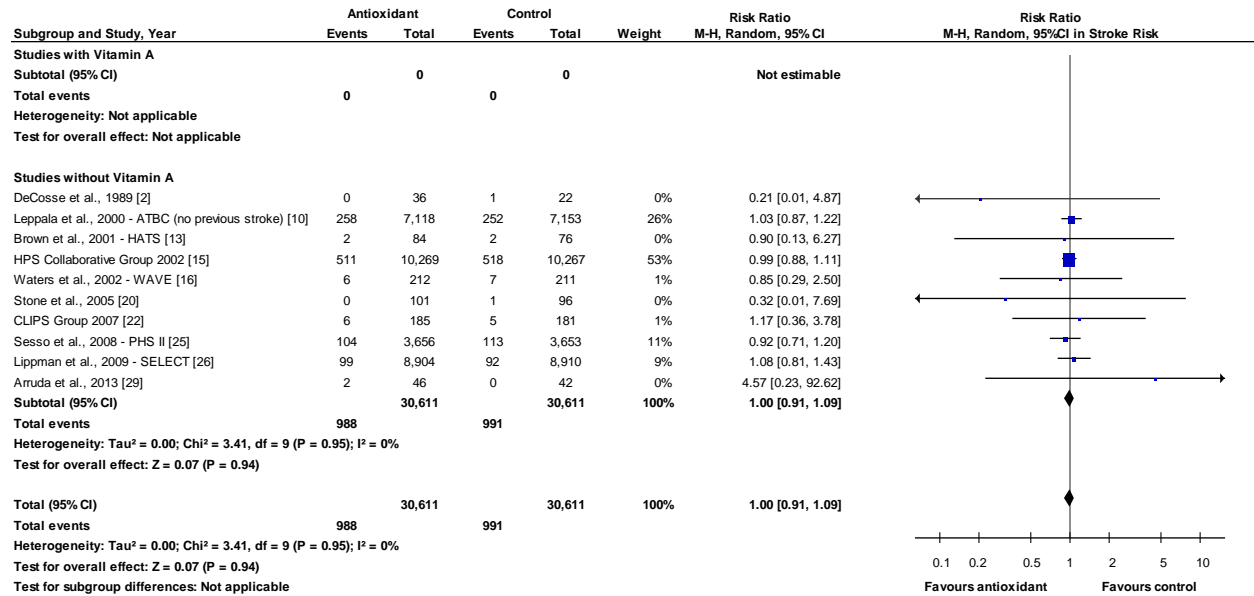

**Supplementary Figure 49. Sensitivity analysis of antioxidant supplementation and stroke risk for studies with and without vitamin A.** M-H, Mantel-Haenszel. The diamond represents the pooled risk estimate. Inter-study heterogeneity was tested using the Cochran Q statistic (Chi<sup>2</sup>) at a significance level of P < 0.10, and quantified by the I<sup>2</sup> statistic. An I<sup>2</sup> value ≥ 50% is considered to indicate substantial heterogeneity. All results are presented as risk ratios with 95% Confidence Intervals, using the Mantel-Haenszel method with random effects model.

## ONLINE SUPPORTING MATERIAL

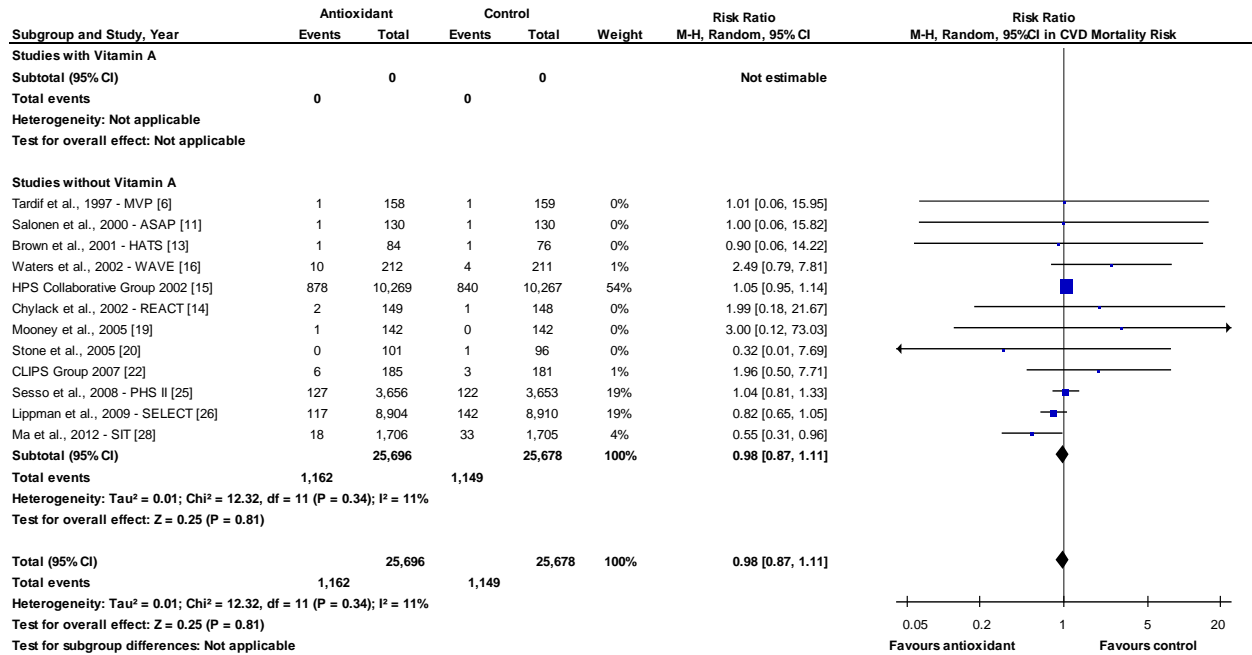

**Supplementary Figure 50. Sensitivity analysis of antioxidant supplementation total CVD mortality risk for studies with and without vitamin A.** M-H, Mantel-Haenszel, CVD, cardiovascular disease. The diamond represents the pooled risk estimate. Inter-study heterogeneity was tested using the Cochran Q statistic (Chi<sup>2</sup>) at a significance level of P < 0.10, and quantified by the I<sup>2</sup> statistic. An I<sup>2</sup> value ≥ 50% is considered to indicate substantial heterogeneity. All results are presented as risk ratios with 95% Confidence Intervals, using the Mantel-Haenszel method with random effects model.

## ONLINE SUPPORTING MATERIAL

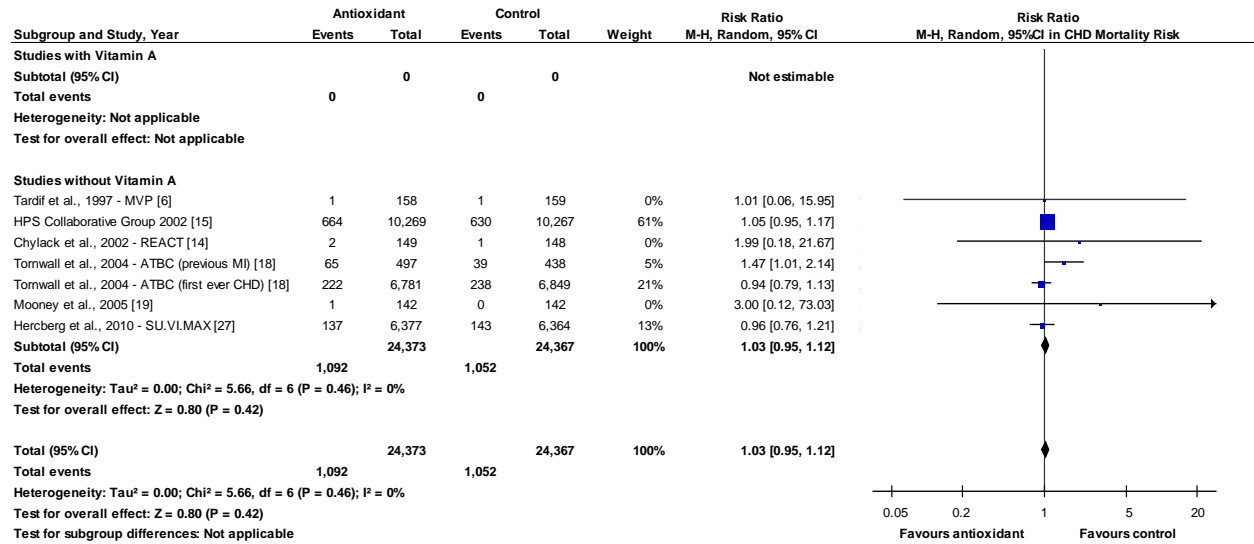

**Supplementary Figure 51. Sensitivity analysis of antioxidant supplementation and CHD mortality risk for studies with and without vitamin A.** M-H, Mantel-Haenszel, CHD, coronary heart disease. The diamond represents the pooled risk estimate. Inter-study heterogeneity was tested using the Cochran Q statistic (Chi<sup>2</sup>) at a significance level of P < 0.10, and quantified by the I<sup>2</sup> statistic. An I<sup>2</sup> value ≥ 50% is considered to indicate substantial heterogeneity. All results are presented as risk ratios with 95% Confidence Intervals, using the Mantel-Haenszel method with random effects model.

## ONLINE SUPPORTING MATERIAL

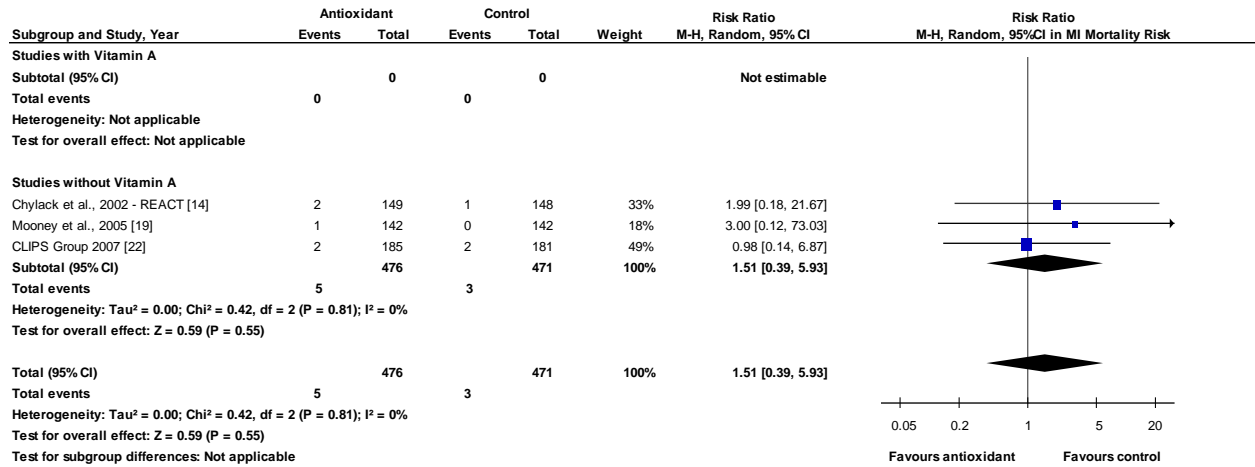

**Supplementary Figure 52. Sensitivity analysis of antioxidant supplementation and MI mortality risk for studies with and without vitamin A.** M-H, Mantel-Haenszel, MI, myocardial infarction. The diamond represents the pooled risk estimate. Inter-study heterogeneity was tested using the Cochran Q statistic (Chi<sup>2</sup>) at a significance level of P < 0.10, and quantified by the I<sup>2</sup> statistic. An I<sup>2</sup> value ≥ 50% is considered to indicate substantial heterogeneity. All results are presented as risk ratios with 95% Confidence Intervals, using the Mantel-Haenszel method with random effects model.

## ONLINE SUPPORTING MATERIAL

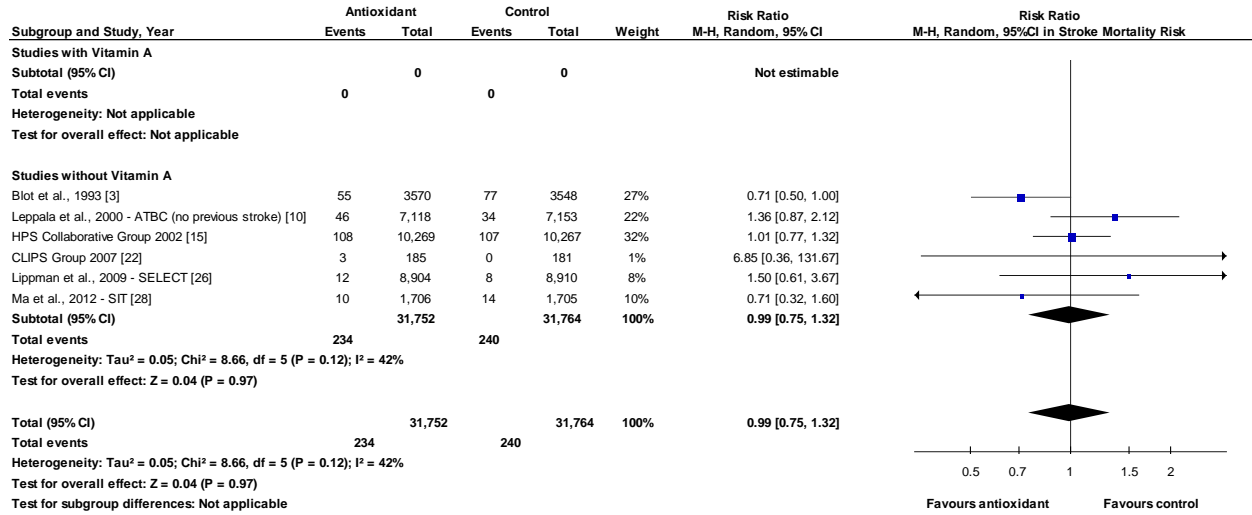

**Supplementary Figure 53. Sensitivity analysis of antioxidant supplementation and stroke mortality risk for studies with and without vitamin A.** M-H, Mantel-Haenszel. The diamond represents the pooled risk estimate. Inter-study heterogeneity was tested using the Cochran Q statistic (Chi<sup>2</sup>) at a significance level of P < 0.10, and quantified by the I<sup>2</sup> statistic. An I<sup>2</sup> value ≥ 50% is considered to indicate substantial heterogeneity. All results are presented as risk ratios with 95% Confidence Intervals, using the Mantel-Haenszel method with random effects model.

## ONLINE SUPPORTING MATERIAL

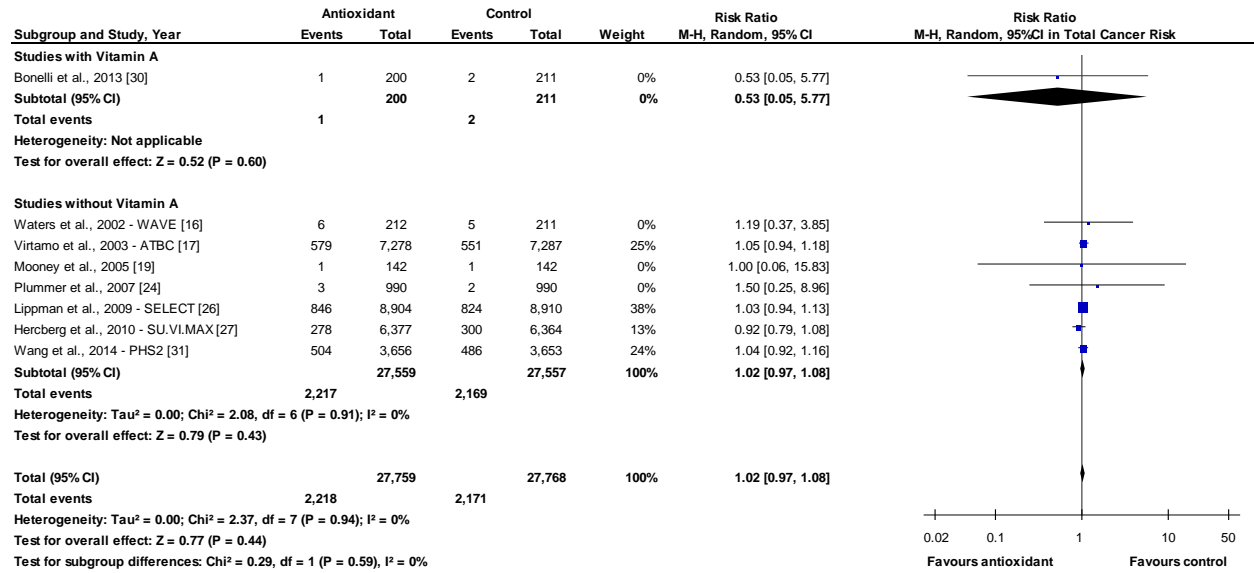

**Supplementary Figure 54. Sensitivity analysis of antioxidant supplementation and total cancer risk for studies with and without vitamin A.** M-H, Mantel-Haenszel. The diamond represents the pooled risk estimate. Inter-study heterogeneity was tested using the Cochran Q statistic (Chi<sup>2</sup>) at a significance level of P < 0.10, and quantified by the I<sup>2</sup> statistic. An I<sup>2</sup> value ≥ 50% is considered to indicate substantial heterogeneity. All results are presented as risk ratios with 95% Confidence Intervals, using the Mantel-Haenszel method with random effects model.



## ONLINE SUPPORTING MATERIAL

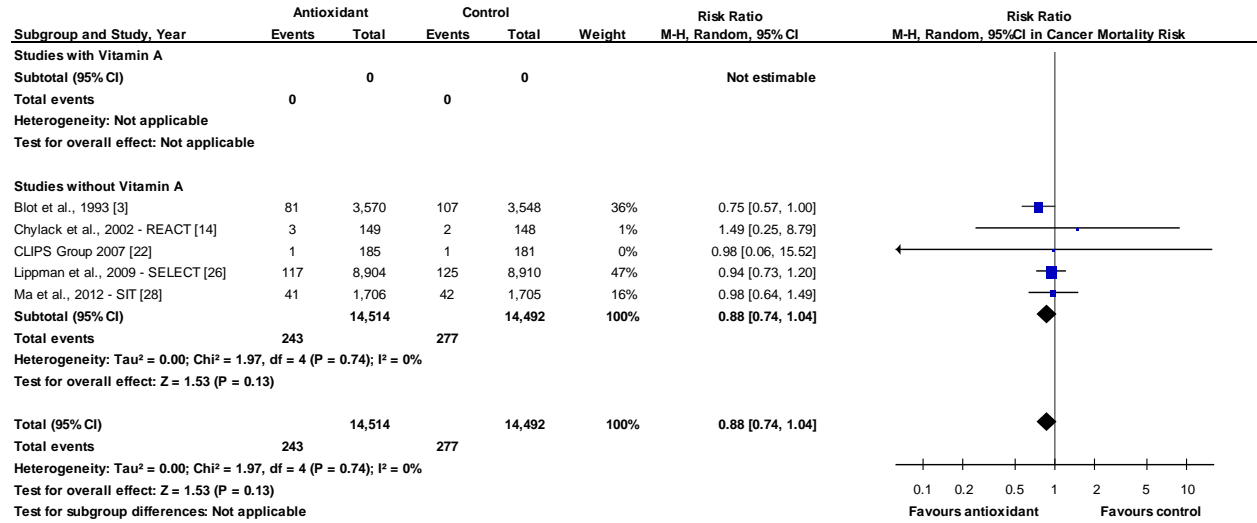

**Supplementary Figure 55. Sensitivity analysis of antioxidant supplementation and cancer mortality risk for studies with and without vitamin A.** M-H, Mantel-Haenszel. The diamond represents the pooled risk estimate. Inter-study heterogeneity was tested using the Cochran Q statistic (Chi<sup>2</sup>) at a significance level of P < 0.10, and quantified by the I<sup>2</sup> statistic. An I<sup>2</sup> value ≥ 50% is considered to indicate substantial heterogeneity. All results are presented as risk ratios with 95% Confidence Intervals, using the Mantel-Haenszel method with random effects model.

## ONLINE SUPPORTING MATERIAL

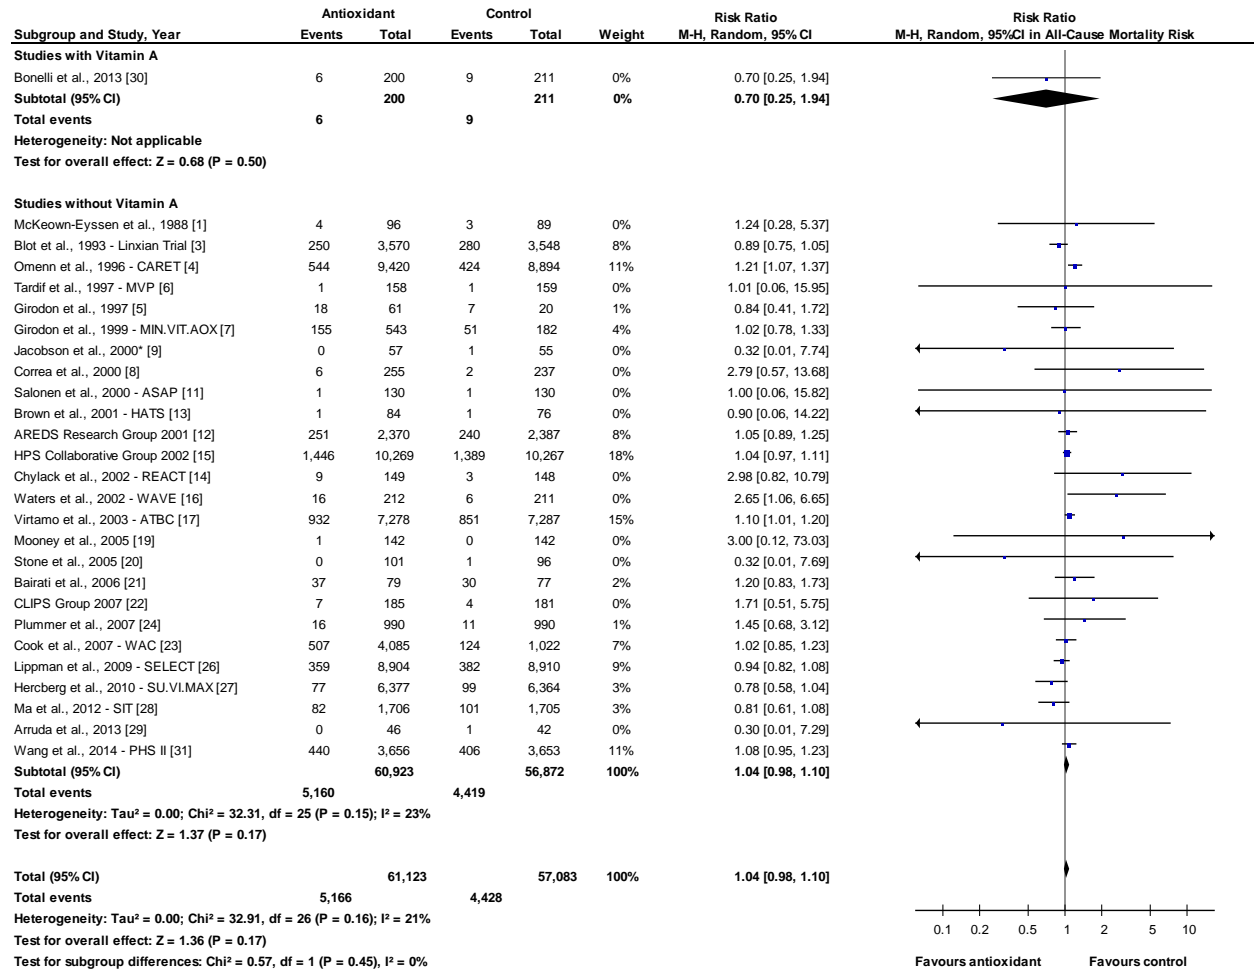

**Supplementary Figure 56. Sensitivity analysis of antioxidant supplementation and all-cause mortality risk for studies with and without vitamin A.** M-H, Mantel-Haenszel.

\*Jacobson et al., 2000 – data retrieved from meta-analysis Bjelakovic 2012 (44). The diamond represents the pooled risk estimate. Inter-study heterogeneity was tested using the Cochran Q statistic (Chi<sup>2</sup>) at a significance level of P < 0.10, and quantified by the I<sup>2</sup> statistic. An I<sup>2</sup> value ≥ 50% is considered to indicate substantial heterogeneity. All results are presented as risk ratios with 95% Confidence Intervals, using the Mantel-Haenszel method with random.

## ONLINE SUPPORTING MATERIAL

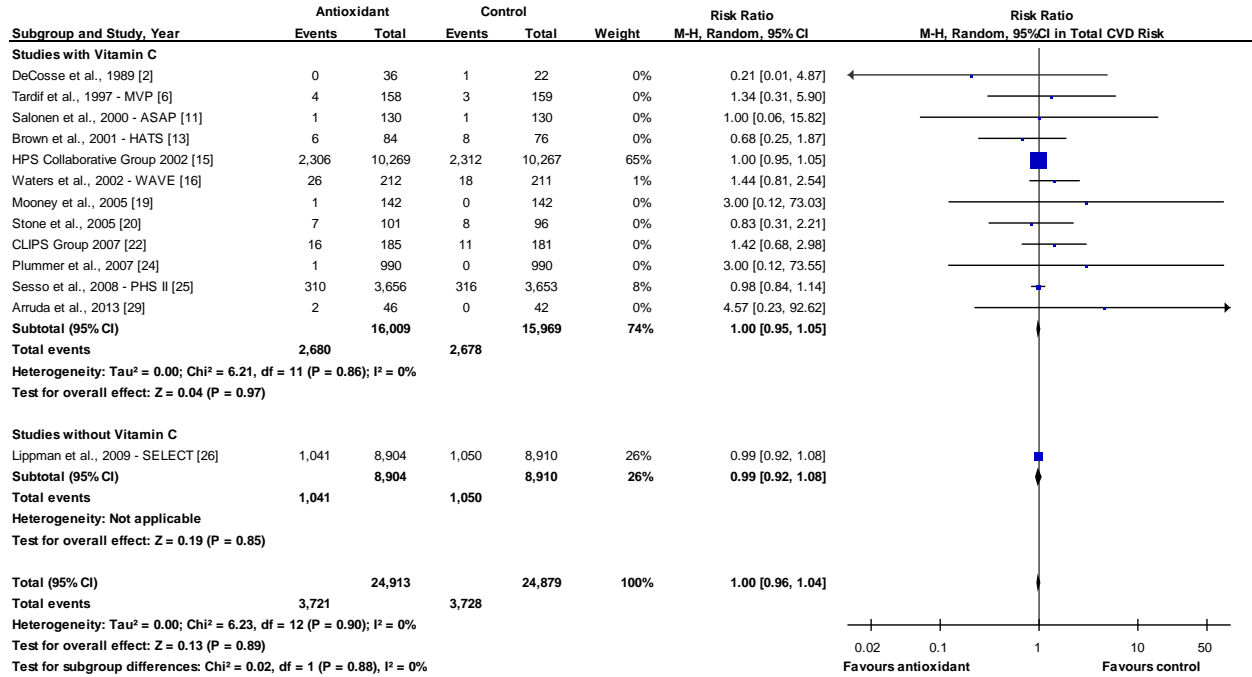

**Supplementary Figure 57. Sensitivity analysis of antioxidant supplementation and total CVD risk for studies with and without vitamin C.** M-H, Mantel-Haenszel, CVD, cardiovascular disease. The diamond represents the pooled risk estimate. Inter-study heterogeneity was tested using the Cochran Q statistic (Chi<sup>2</sup>) at a significance level of P < 0.10, and quantified by the I<sup>2</sup> statistic. An I<sup>2</sup> value ≥ 50% is considered to indicate substantial heterogeneity. All results are presented as risk ratios with 95% Confidence Intervals, using the Mantel-Haenszel method with random effects model.

## ONLINE SUPPORTING MATERIAL

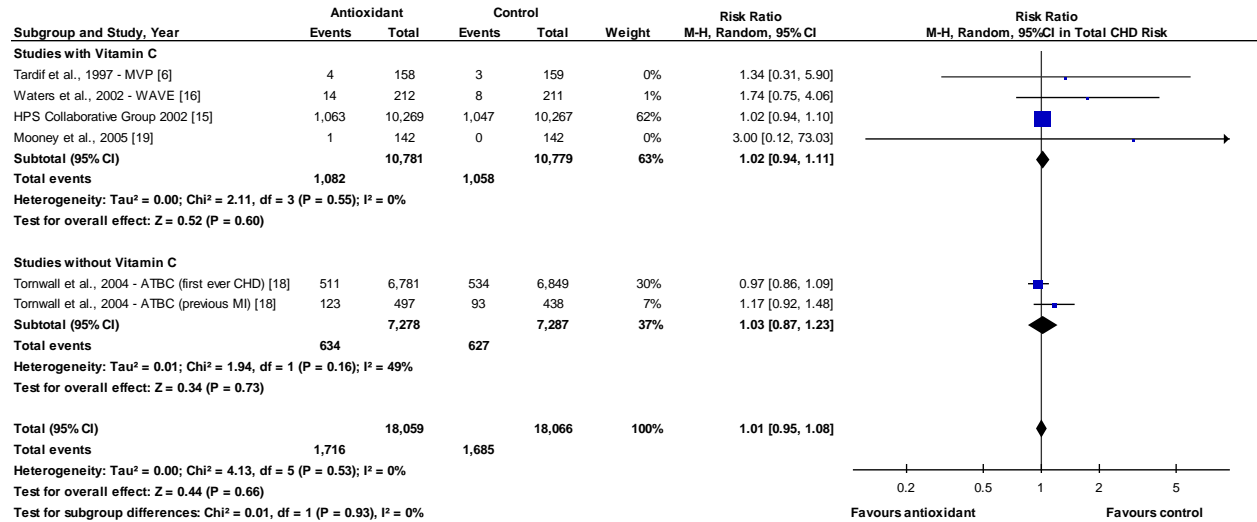

**Supplementary Figure 58. Sensitivity analysis of antioxidant supplementation and total CHD risk for studies with and without vitamin C.** M-H, Mantel-Haenszel, CHD, coronary heart disease. The diamond represents the pooled risk estimate. Inter-study heterogeneity was tested using the Cochran Q statistic (Chi<sup>2</sup>) at a significance level of P < 0.10, and quantified by the I<sup>2</sup> statistic. An I<sup>2</sup> value ≥ 50% is considered to indicate substantial heterogeneity. All results are presented as risk ratios with 95% Confidence Intervals, using the Mantel-Haenszel method with random effects model.

## ONLINE SUPPORTING MATERIAL

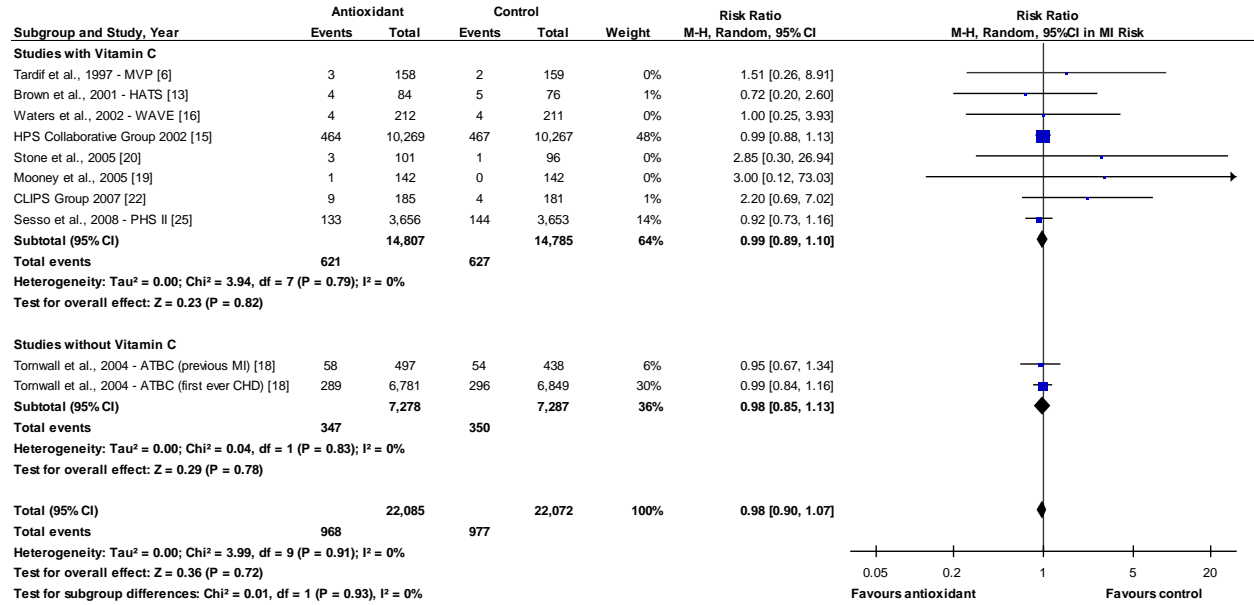

**Supplementary Figure 59. Sensitivity analysis of antioxidant supplementation and MI risk for studies with and without vitamin C.** M-H, Mantel-Haenszel, MI, myocardial infarction.

The diamond represents the pooled risk estimate. Inter-study heterogeneity was tested using the Cochran Q statistic (Chi<sup>2</sup>) at a significance level of P < 0.10, and quantified by the I<sup>2</sup> statistic. An I<sup>2</sup> value ≥ 50% is considered to indicate substantial heterogeneity. All results are presented as risk ratios with 95% Confidence Intervals, using the Mantel-Haenszel method with random effects model.

## ONLINE SUPPORTING MATERIAL

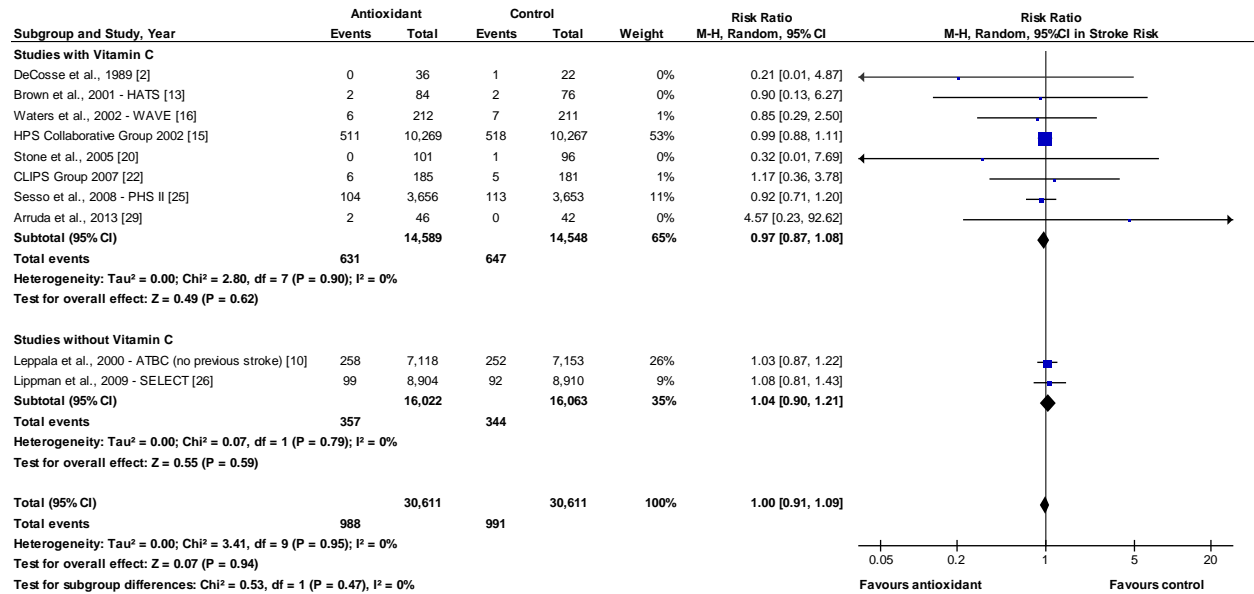

**Supplementary Figure 60. Sensitivity analysis of antioxidant supplementation and stroke risk for studies with and without vitamin C.** M-H, Mantel-Haenszel. The diamond represents the pooled risk estimate. Inter-study heterogeneity was tested using the Cochran Q statistic (Chi<sup>2</sup>) at a significance level of P < 0.10, and quantified by the I<sup>2</sup> statistic. An I<sup>2</sup> value ≥ 50% is considered to indicate substantial heterogeneity. All results are presented as risk ratios with 95% Confidence Intervals, using the Mantel-Haenszel method with random effects model.

## ONLINE SUPPORTING MATERIAL

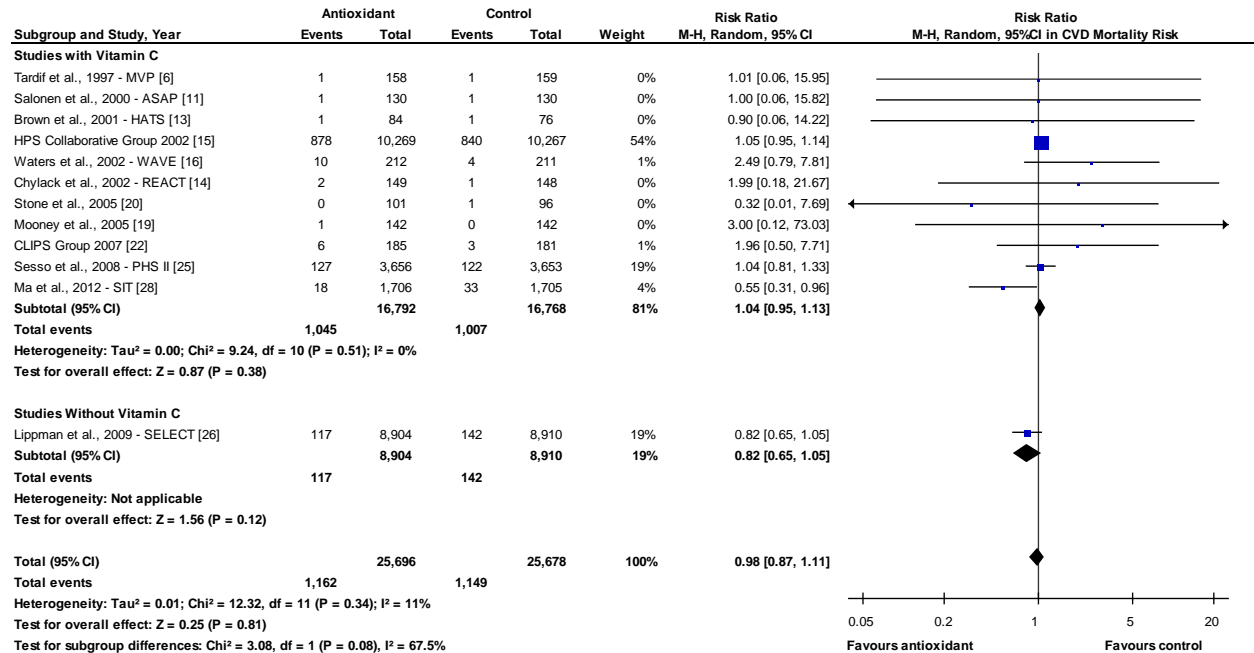

**Supplementary Figure 61. Sensitivity analysis of antioxidant supplementation and CVD mortality risk for studies with and without vitamin C.** M-H, Mantel-Haenszel, CVD, cardiovascular disease. The diamond represents the pooled risk estimate. Inter-study heterogeneity was tested using the Cochran Q statistic (Chi<sup>2</sup>) at a significance level of P < 0.10, and quantified by the I<sup>2</sup> statistic. An I<sup>2</sup> value ≥ 50% is considered to indicate substantial heterogeneity. All results are presented as risk ratios with 95% Confidence Intervals, using the Mantel-Haenszel method with random effects model.

## ONLINE SUPPORTING MATERIAL

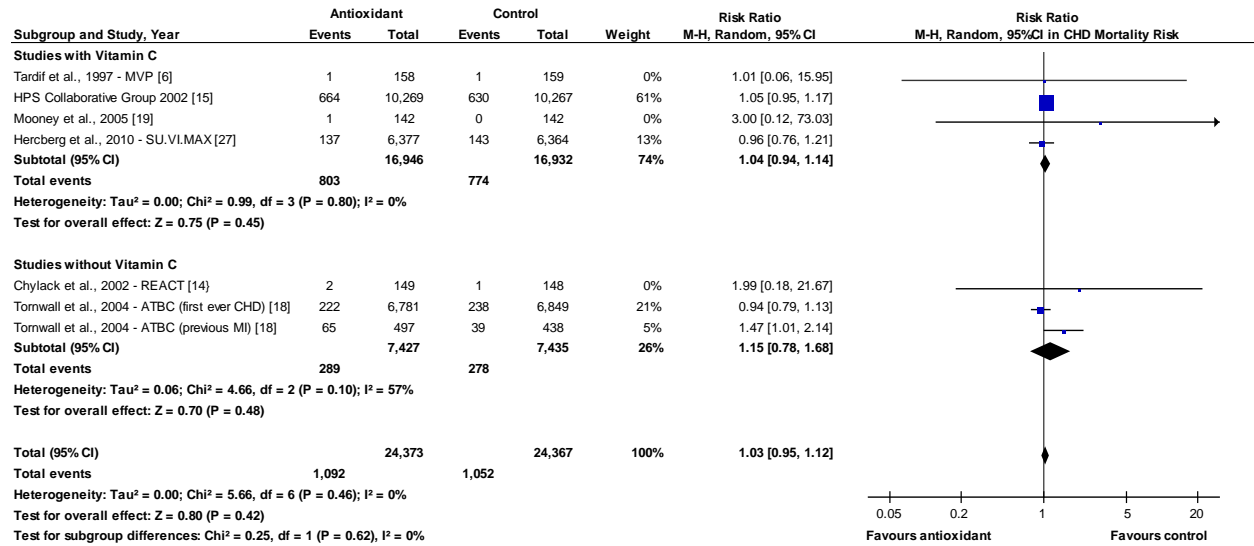

### Supplementary Figure 62. Sensitivity analysis of antioxidant supplementation and CHD mortality risk for studies with and without vitamin C.

M-H, Mantel-Haenszel, CHD, coronary heart disease. The diamond represents the pooled risk estimate. Inter-study heterogeneity was tested using the Cochran Q statistic (Chi<sup>2</sup>) at a significance level of P < 0.10, and quantified by the I<sup>2</sup> statistic. An I<sup>2</sup> value ≥ 50% is considered to indicate substantial heterogeneity. All results are presented as risk ratios with 95% Confidence Intervals, using the Mantel-Haenszel method with random effects model.



## ONLINE SUPPORTING MATERIAL

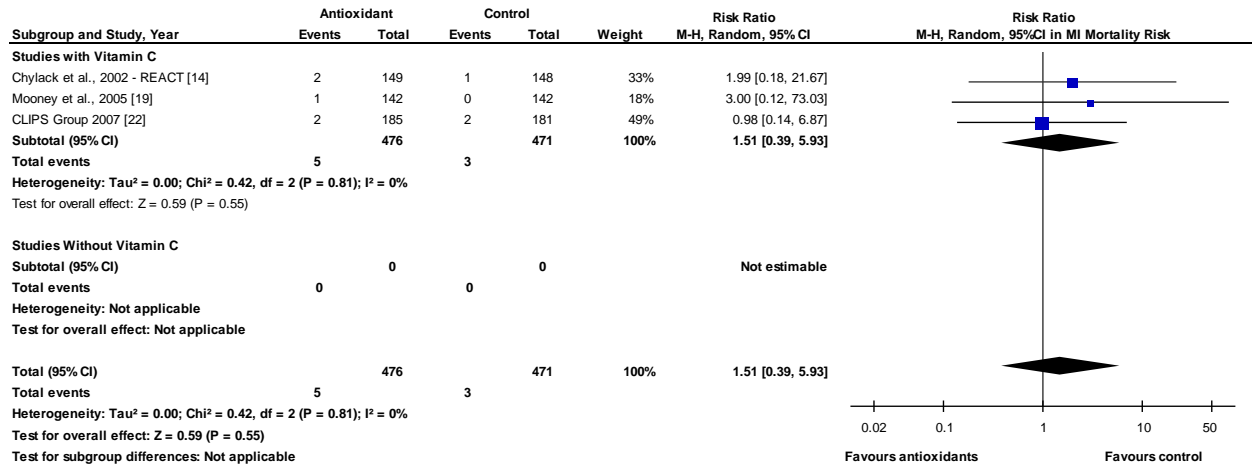

**Supplementary Figure 63. Sensitivity analysis of antioxidant supplementation and MI mortality risk for studies with and without vitamin C.** M-H, Manthel-Haenszel, MI, myocardial infarction. The diamond represents the pooled risk estimate. Inter-study heterogeneity was tested using the Cochran Q statistic (Chi<sup>2</sup>) at a significance level of P < 0.10, and quantified by the I<sup>2</sup> statistic. An I<sup>2</sup> value ≥ 50% is considered to indicate substantial heterogeneity. All results are presented as risk ratios with 95% Confidence Intervals, using the Manthel-Haenszel method with random effects model.

## ONLINE SUPPORTING MATERIAL

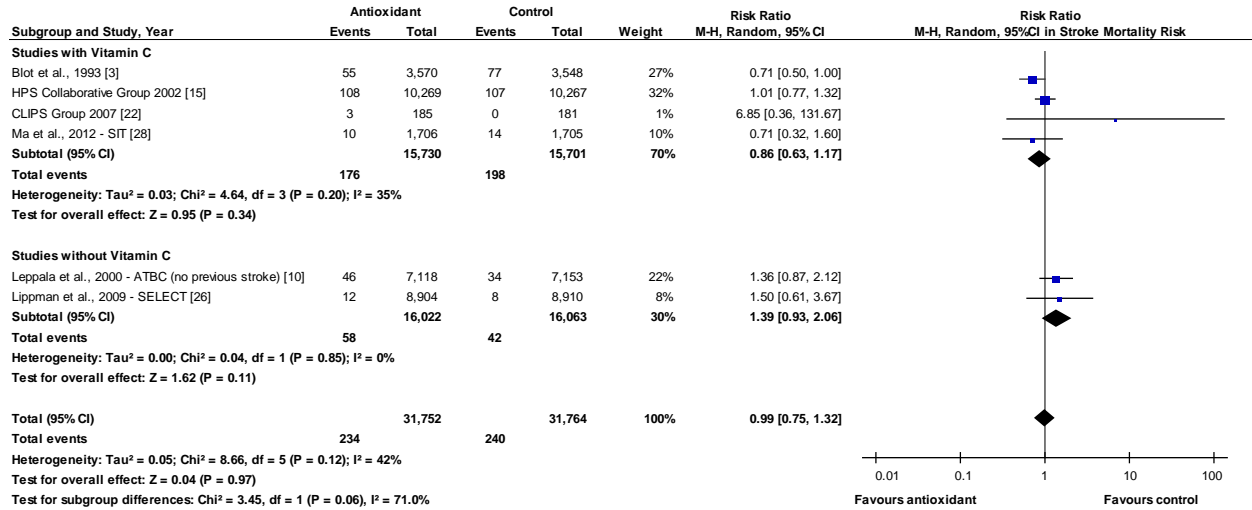

**Supplementary Figure 64. Sensitivity analysis of antioxidant supplementation and stroke mortality risk for studies with and without vitamin C.** M-H, Mantel-Haenszel. The diamond represents the pooled risk estimate. Inter-study heterogeneity was tested using the Cochran Q statistic (Chi<sup>2</sup>) at a significance level of P < 0.10, and quantified by the I<sup>2</sup> statistic. An I<sup>2</sup> value ≥ 50% is considered to indicate substantial heterogeneity. All results are presented as risk ratios with 95% Confidence Intervals, using the Mantel-Haenszel method with random effects model.

## ONLINE SUPPORTING MATERIAL

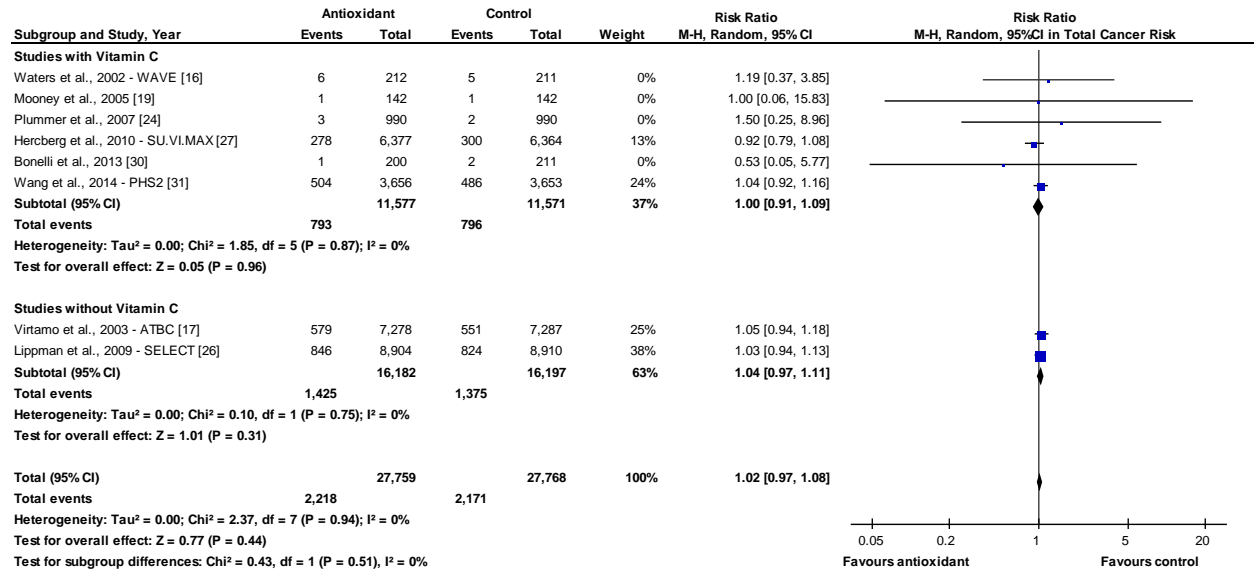

**Supplementary Figure 65. Sensitivity analysis of antioxidant supplementation and total cancer risk for studies with and without vitamin C.** M-H, Mantel-Haenszel. The diamond represents the pooled risk estimate. Inter-study heterogeneity was tested using the Cochran Q statistic (Chi<sup>2</sup>) at a significance level of P < 0.10, and quantified by the I<sup>2</sup> statistic. An I<sup>2</sup> value ≥ 50% is considered to indicate substantial heterogeneity. All results are presented as risk ratios with 95% Confidence Intervals, using the Mantel-Haenszel method with random effects model.

## ONLINE SUPPORTING MATERIAL

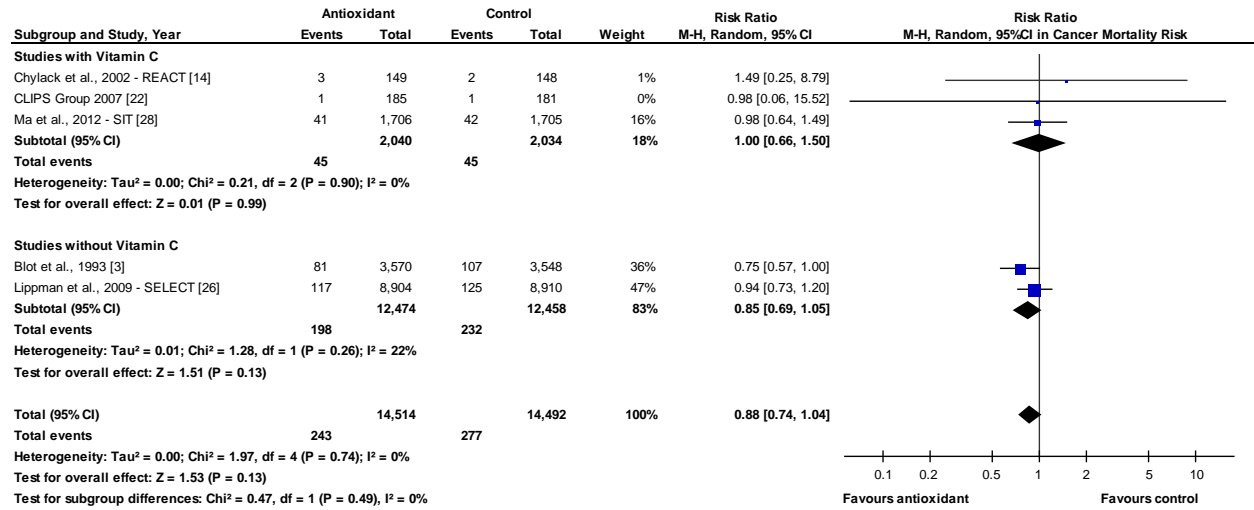

**Supplementary Figure 66. Sensitivity analysis of antioxidant supplementation and cancer mortality risk for studies with and without vitamin C.** M-H, Manthel-Haenszel. The diamond represents the pooled risk estimate. Inter-study heterogeneity was tested using the Cochran Q statistic (Chi<sup>2</sup>) at a significance level of P < 0.10, and quantified by the I<sup>2</sup> statistic. An I<sup>2</sup> value ≥ 50% is considered to indicate substantial heterogeneity. All results are presented as risk ratios with 95% Confidence Intervals, using the Manthel-Haenszel method with random effects model.

## ONLINE SUPPORTING MATERIAL

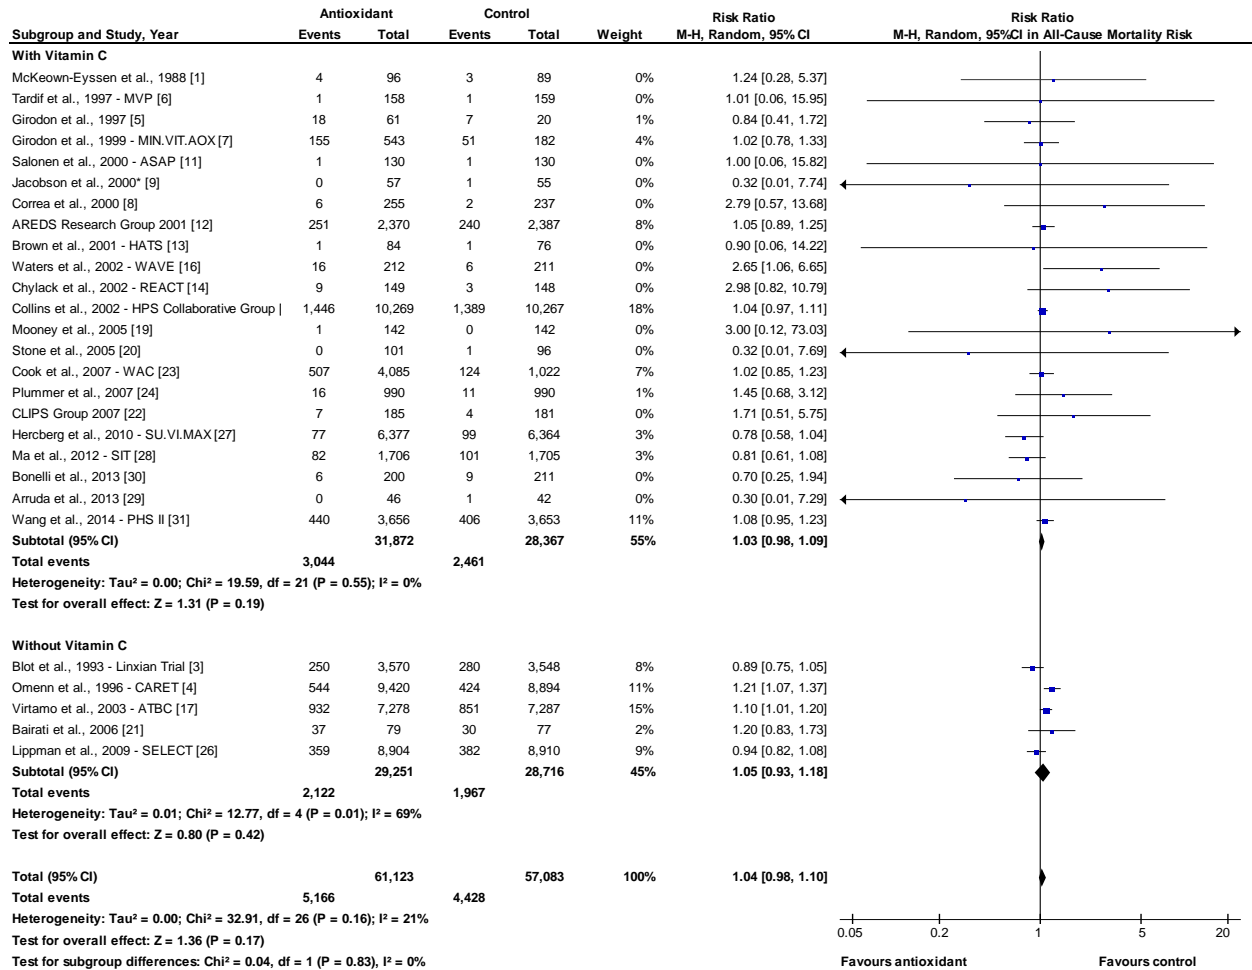

**Supplementary Figure 67. Sensitivity analysis of antioxidant supplementation and all-cause mortality risk for studies with and without vitamin C.** M-H, Mantel-Haenszel.

\*Jacobson et al., 2000 – data retrieved from meta-analysis Bjelakovic 2012 (44). The diamond represents the pooled risk estimate. Inter-study heterogeneity was tested using the Cochran Q statistic (Chi<sup>2</sup>) at a significance level of P < 0.10, and quantified by the I<sup>2</sup> statistic. An I<sup>2</sup> value ≥ 50% is considered to indicate substantial heterogeneity. All results are presented as risk ratios with 95% Confidence Intervals, using the Mantel-Haenszel method with random.

## ONLINE SUPPORTING MATERIAL

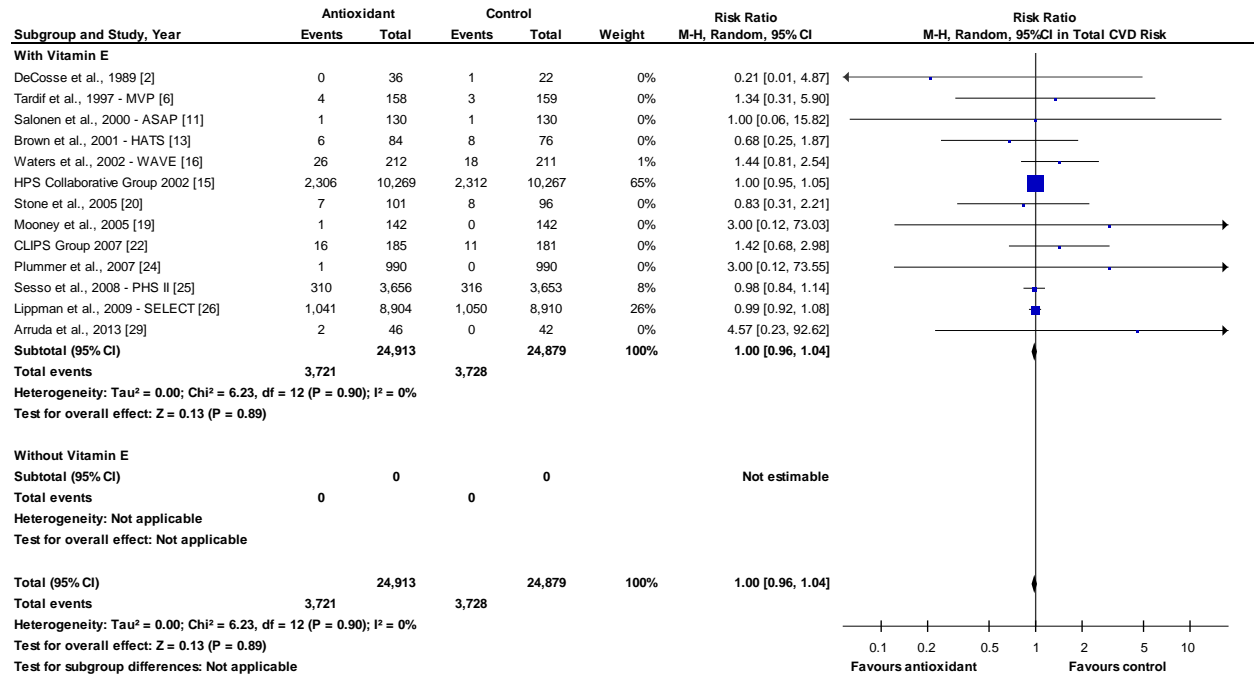

**Supplementary Figure 68. Sensitivity analysis of antioxidant supplementation and total CVD risk for studies with and without vitamin E.** M-H, Mantel-Haenszel, CVD, cardiovascular disease. The diamond represents the pooled risk estimate. Inter-study heterogeneity was tested using the Cochran Q statistic (Chi<sup>2</sup>) at a significance level of P < 0.10, and quantified by the I<sup>2</sup> statistic. An I<sup>2</sup> value ≥ 50% is considered to indicate substantial heterogeneity. All results are presented as risk ratios with 95% Confidence Intervals, using the Mantel-Haenszel method with random effects model.

## ONLINE SUPPORTING MATERIAL

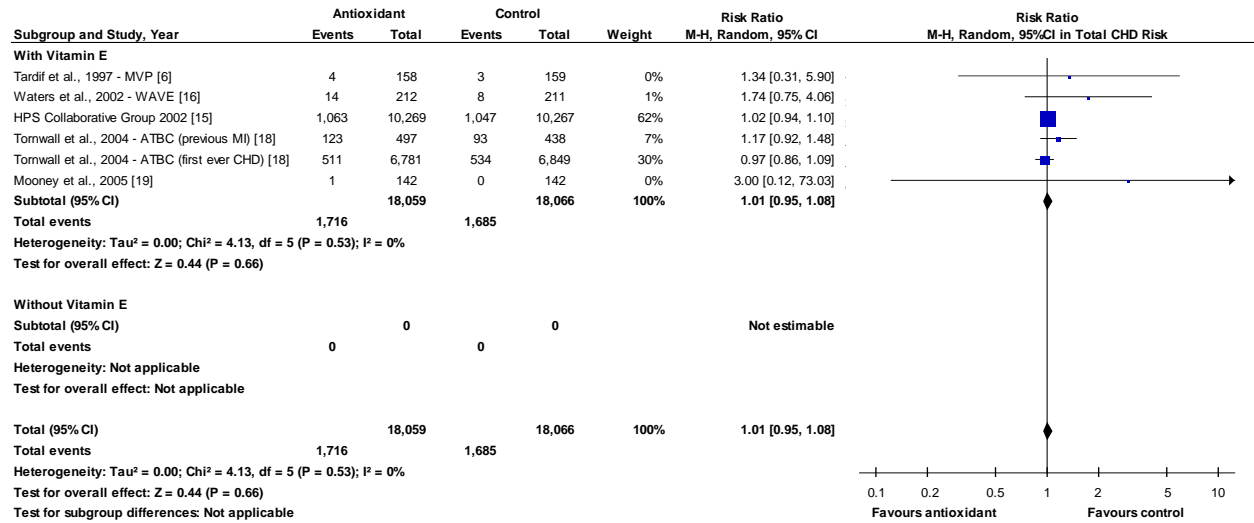

**Supplementary Figure 69. Sensitivity analysis of antioxidant supplementation and total CHD risk for studies with and without vitamin E.** M-H, Mantel-Haenszel, CHD, coronary heart disease. The diamond represents the pooled risk estimate. Inter-study heterogeneity was tested using the Cochran Q statistic ( $\chi^2$ ) at a significance level of  $P < 0.10$ , and quantified by the  $I^2$  statistic. An  $I^2$  value  $\geq 50\%$  is considered to indicate substantial heterogeneity. All results are presented as risk ratios with 95% Confidence Intervals, using the Mantel-Haenszel method with random effects model.

## ONLINE SUPPORTING MATERIAL

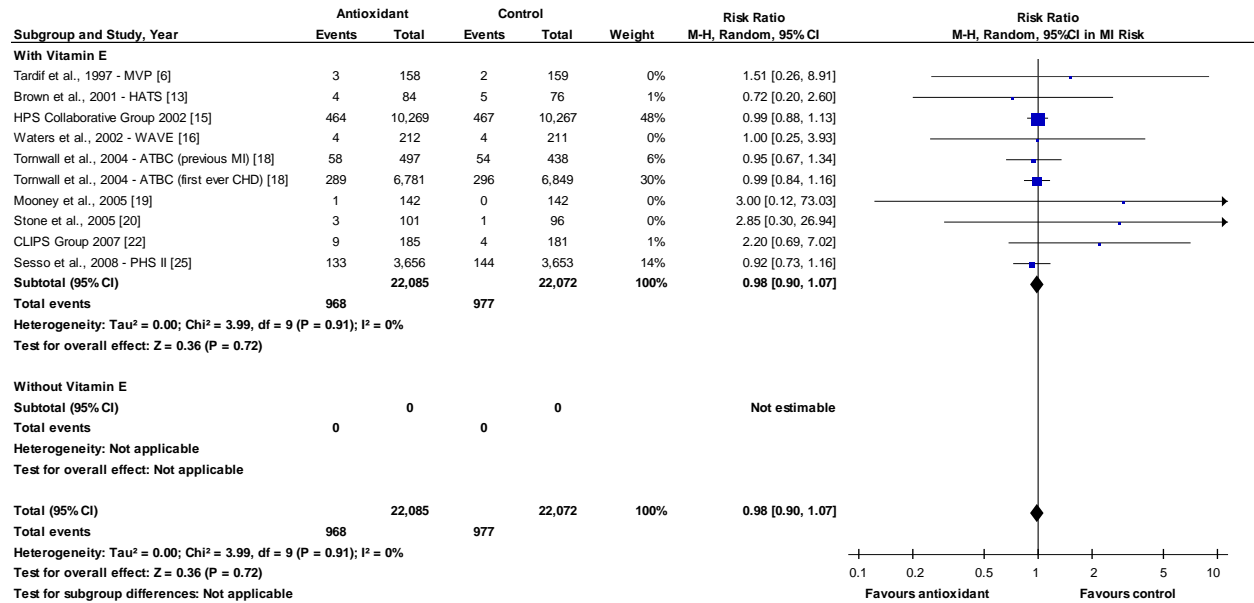

**Supplementary Figure 70. Sensitivity analysis of antioxidant supplementation and MI risk for studies with and without vitamin E.** M-H, Manthel-Haenszel, MI, myocardial infarction.

The diamond represents the pooled risk estimate. Inter-study heterogeneity was tested using the Cochran Q statistic (Chi<sup>2</sup>) at a significance level of P < 0.10, and quantified by the I<sup>2</sup> statistic. An I<sup>2</sup> value ≥ 50% is considered to indicate substantial heterogeneity. All results are presented as risk ratios with 95% Confidence Intervals, using the Manthel-Haenszel method with random effects model.



## ONLINE SUPPORTING MATERIAL

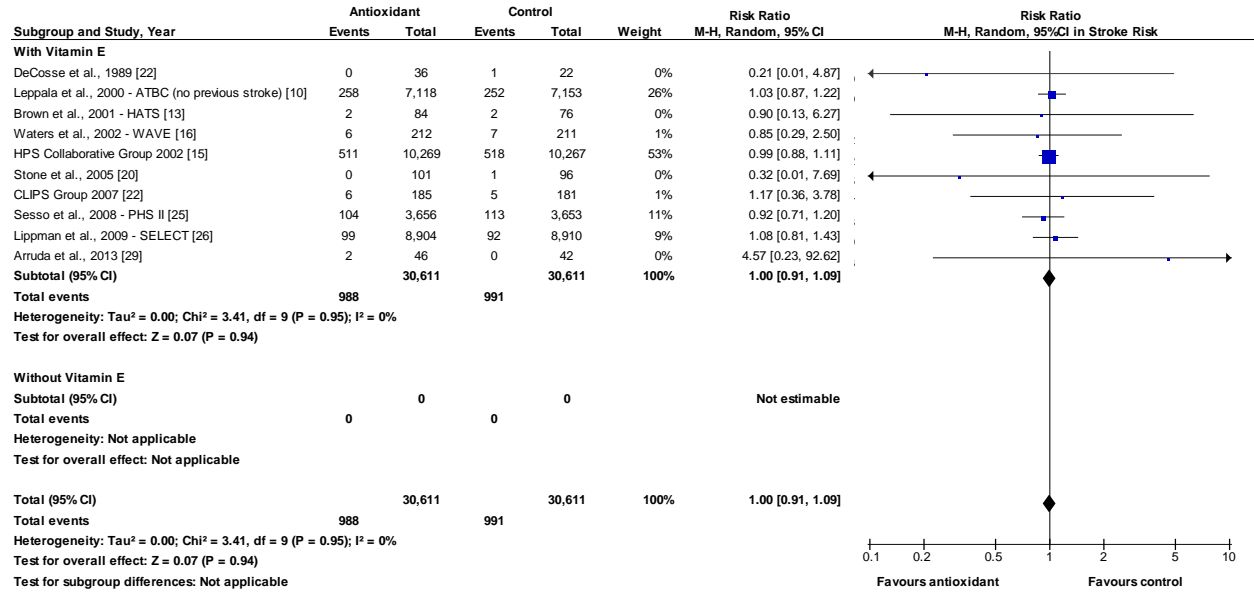

**Supplementary Figure 71. Sensitivity analysis of antioxidant supplementation and stroke risk for studies with and without vitamin E.** M-H, Mantel-Haenszel. The diamond represents the pooled risk estimate. Inter-study heterogeneity was tested using the Cochran Q statistic (Chi<sup>2</sup>) at a significance level of P < 0.10, and quantified by the I<sup>2</sup> statistic. An I<sup>2</sup> value ≥ 50% is considered to indicate substantial heterogeneity. All results are presented as risk ratios with 95% Confidence Intervals, using the Mantel-Haenszel method with random effects model.

## ONLINE SUPPORTING MATERIAL

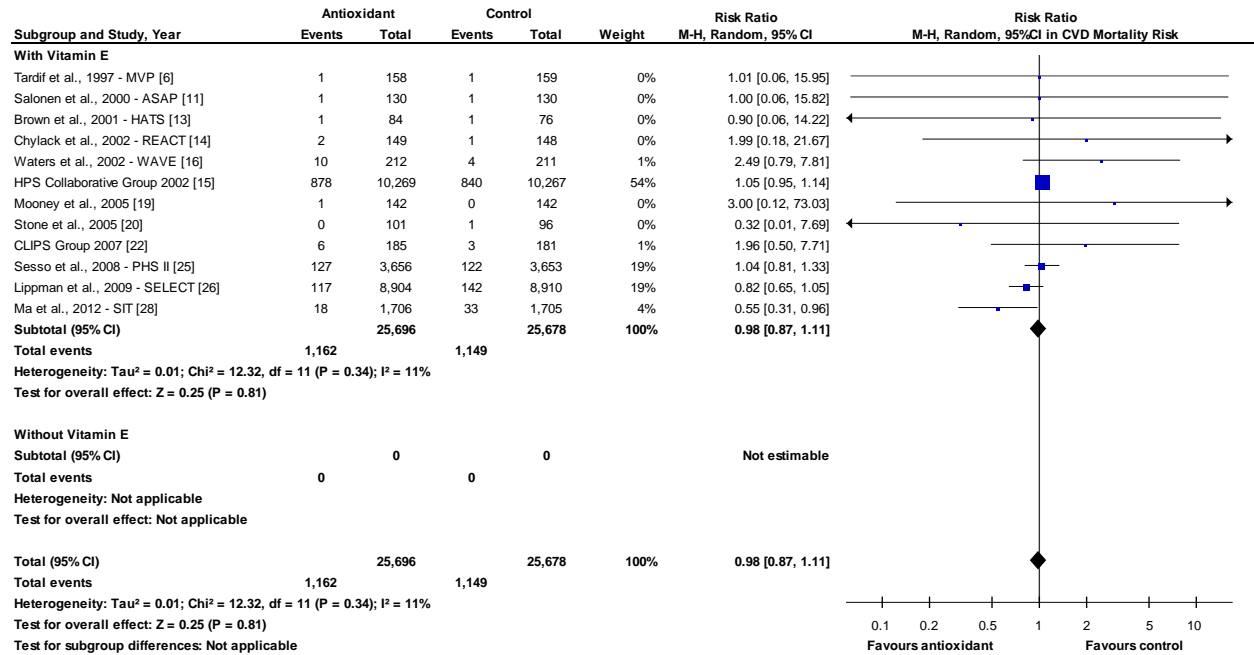

**Supplementary Figure 72. Sensitivity analysis of antioxidant supplementation and CVD mortality risk for studies with and without vitamin E.** M-H, Mantel-Haenszel, CVD, cardiovascular disease. The diamond represents the pooled risk estimate. Inter-study heterogeneity was tested using the Cochran Q statistic (Chi<sup>2</sup>) at a significance level of P < 0.10, and quantified by the I<sup>2</sup> statistic. An I<sup>2</sup> value ≥ 50% is considered to indicate substantial heterogeneity. All results are presented as risk ratios with 95% Confidence Intervals, using the Mantel-Haenszel method with random effects model.

## ONLINE SUPPORTING MATERIAL

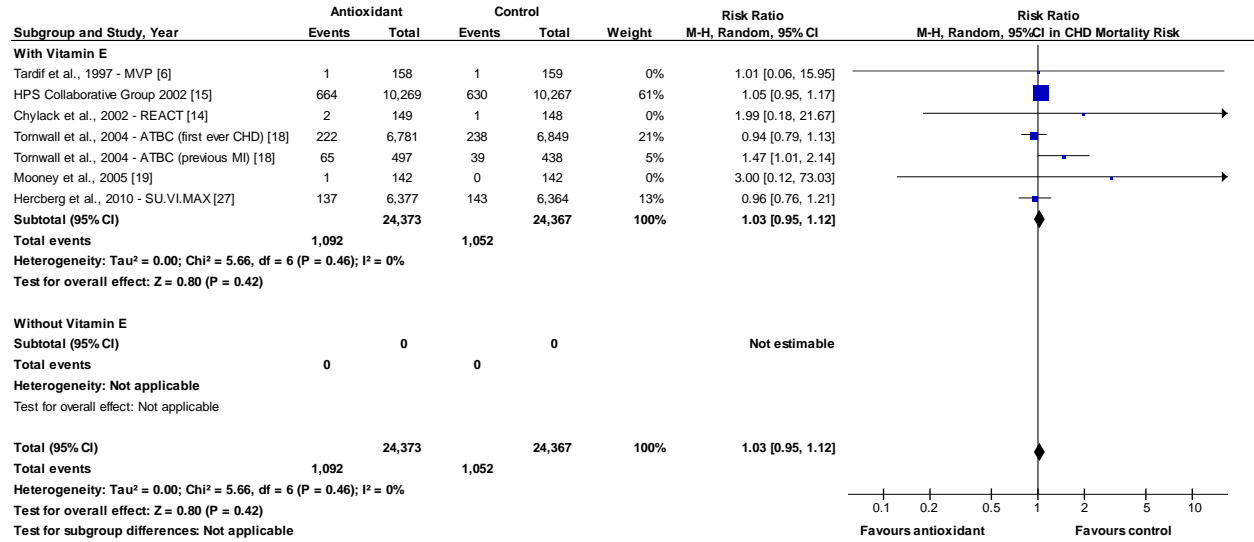

**Supplementary Figure 73. Sensitivity analysis of antioxidant supplementation and CHD mortality risk for studies with and without vitamin E.** M-H, Mantel-Haenszel, CHD, coronary heart disease. The diamond represents the pooled risk estimate. Inter-study heterogeneity was tested using the Cochran Q statistic (Chi<sup>2</sup>) at a significance level of P < 0.10, and quantified by the I<sup>2</sup> statistic. An I<sup>2</sup> value ≥ 50% is considered to indicate substantial heterogeneity. All results are presented as risk ratios with 95% Confidence Intervals, using the Mantel-Haenszel method with random effects model.

## ONLINE SUPPORTING MATERIAL

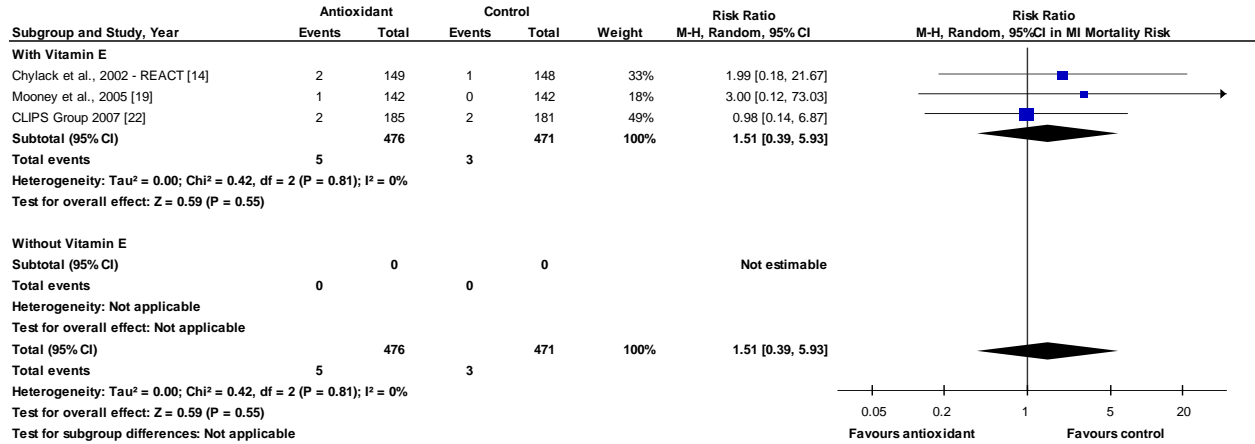

**Supplementary Figure 74. Sensitivity analysis of antioxidant supplementation and MI mortality risk for studies with and without vitamin E.** M-H, Mantel-Haenszel, MI, myocardial infarction. The diamond represents the pooled risk estimate. Inter-study heterogeneity was tested using the Cochran Q statistic (Chi<sup>2</sup>) at a significance level of P < 0.10, and quantified by the I<sup>2</sup> statistic. An I<sup>2</sup> value ≥ 50% is considered to indicate substantial heterogeneity. All results are presented as risk ratios with 95% Confidence Intervals, using the Mantel-Haenszel method with random effects model.

## ONLINE SUPPORTING MATERIAL

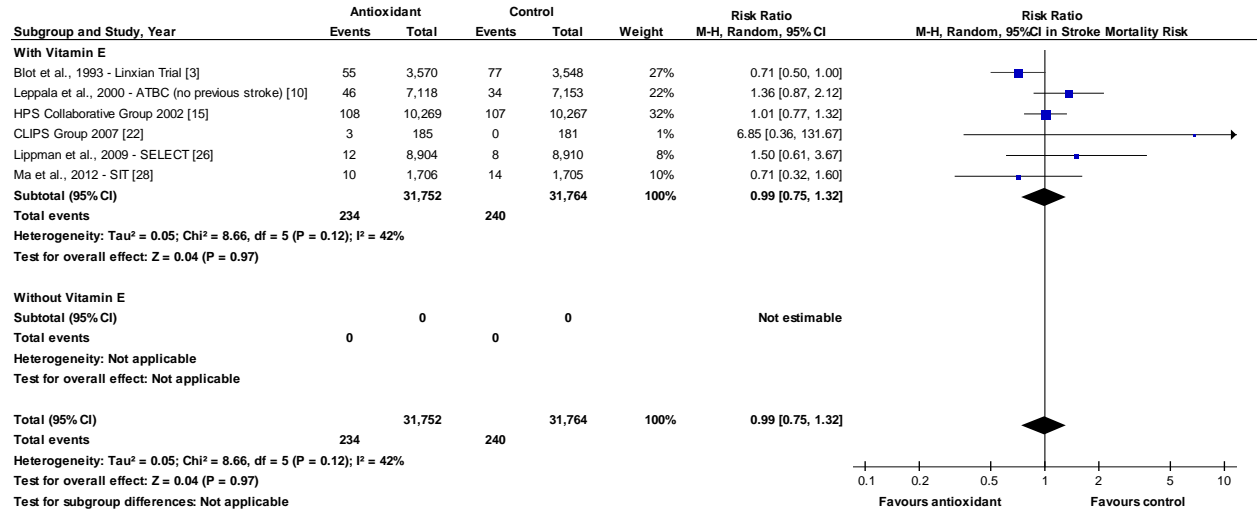

**Supplementary Figure 75. Sensitivity analysis of antioxidant supplementation and stroke mortality risk for studies with and without vitamin E.** M-H, Mantel-Haenszel. The diamond represents the pooled risk estimate. Inter-study heterogeneity was tested using the Cochran Q statistic (Chi<sup>2</sup>) at a significance level of P < 0.10, and quantified by the I<sup>2</sup> statistic. An I<sup>2</sup> value ≥ 50% is considered to indicate substantial heterogeneity. All results are presented as risk ratios with 95% Confidence Intervals, using the Mantel-Haenszel method with random effects model.

## ONLINE SUPPORTING MATERIAL

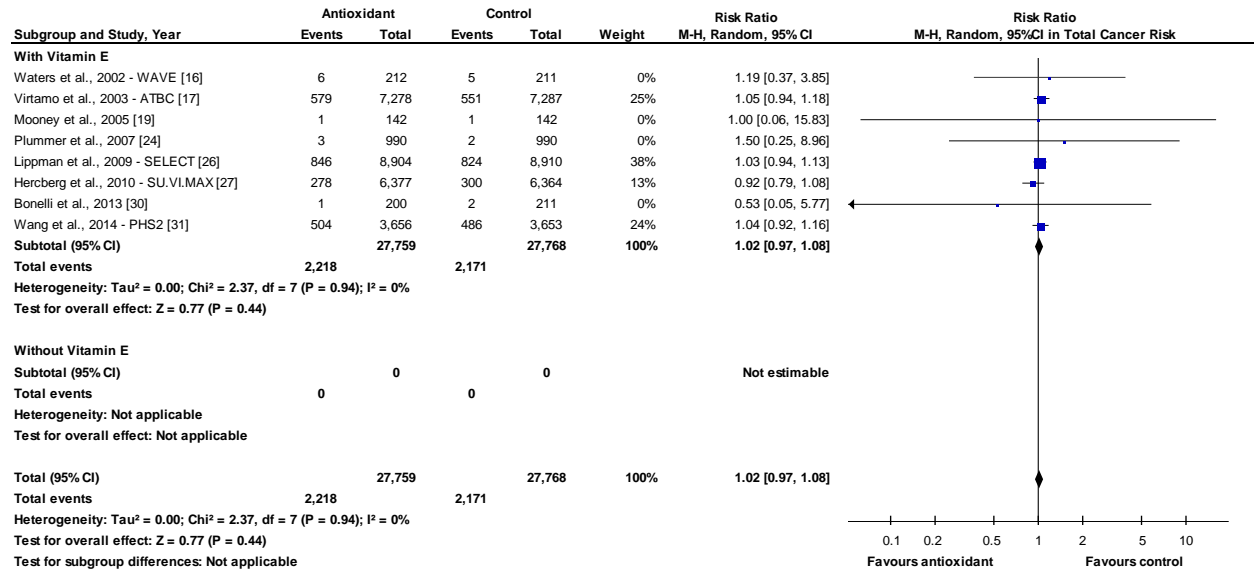

**Supplementary Figure 76. Sensitivity analysis of antioxidant supplementation and total cancer risk for studies with and without vitamin E.** M-H, Mantel-Haenszel. The diamond represents the pooled risk estimate. Inter-study heterogeneity was tested using the Cochran Q statistic (Chi<sup>2</sup>) at a significance level of P < 0.10, and quantified by the I<sup>2</sup> statistic. An I<sup>2</sup> value ≥ 50% is considered to indicate substantial heterogeneity. All results are presented as risk ratios with 95% Confidence Intervals, using the Mantel-Haenszel method with random effects model.

## ONLINE SUPPORTING MATERIAL

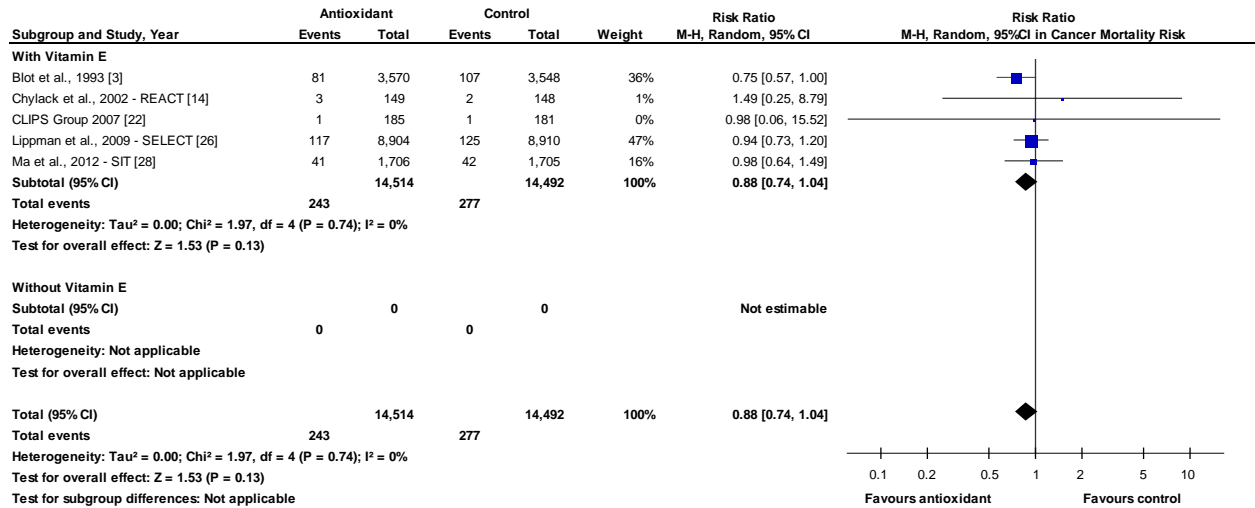

**Supplementary Figure 77. Sensitivity analysis of antioxidant supplementation and cancer mortality risk for studies with and without vitamin E.** M-H, Mantel-Haenszel. The diamond represents the pooled risk estimate. Inter-study heterogeneity was tested using the Cochran Q statistic (Chi<sup>2</sup>) at a significance level of P < 0.10, and quantified by the I<sup>2</sup> statistic. An I<sup>2</sup> value ≥ 50% is considered to indicate substantial heterogeneity. All results are presented as risk ratios with 95% Confidence Intervals, using the Mantel-Haenszel method with random effects model.

## ONLINE SUPPORTING MATERIAL

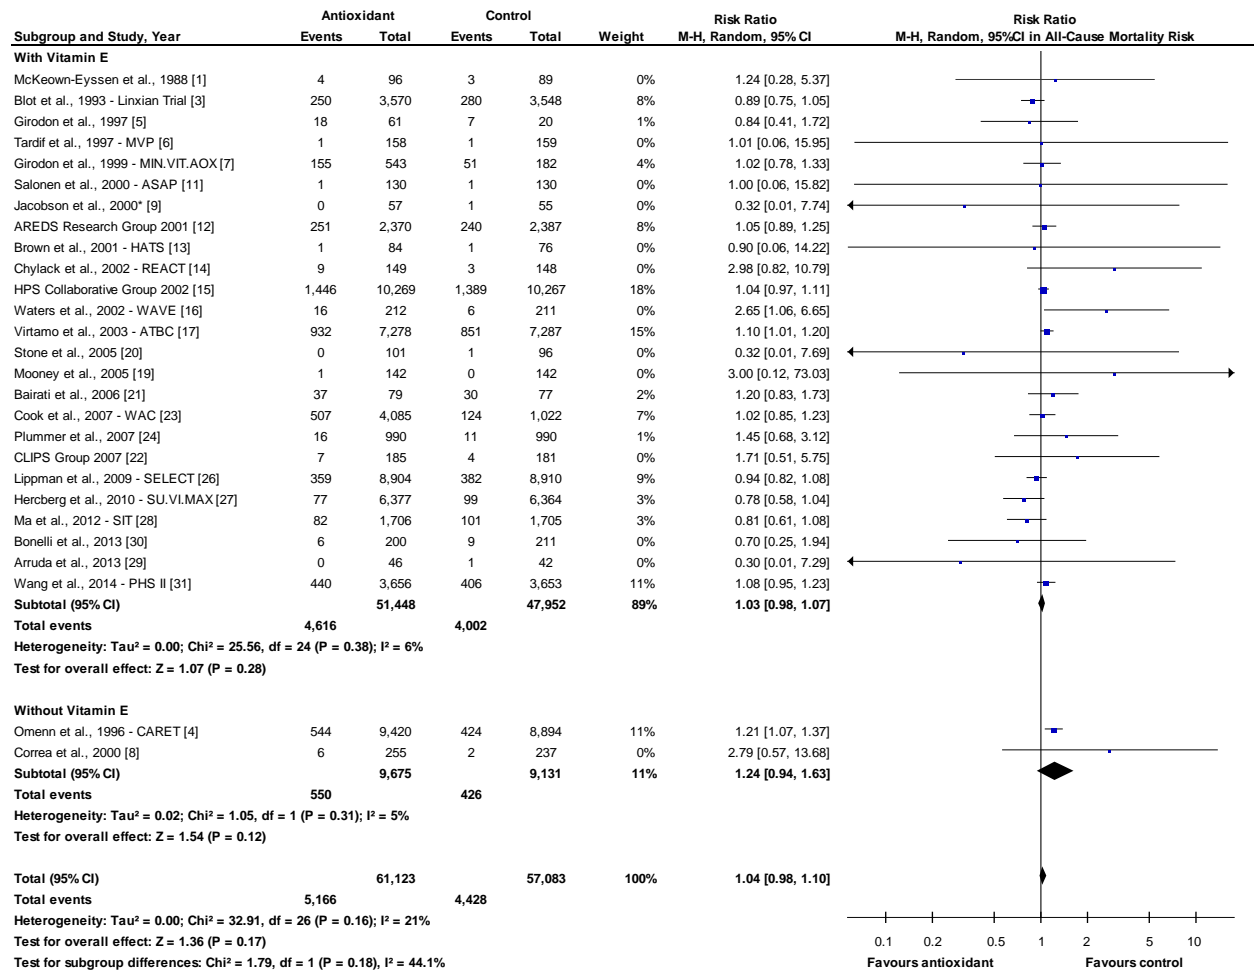

**Supplementary Figure 78. Sensitivity analysis of antioxidant supplementation and all-cause mortality risk for studies with and without vitamin E.** M-H, Mantel-Haenszel.

\* Jacobson et al., 2000 – Data retrieved from meta-analysis Bjelakovic 2012 (44). The diamond represents the pooled risk estimate. Inter-study heterogeneity was tested using the Cochran Q statistic (Chi<sup>2</sup>) at a significance level of P < 0.10, and quantified by the I<sup>2</sup> statistic. An I<sup>2</sup> value ≥ 50% is considered to indicate substantial heterogeneity. All results are presented as risk ratios with 95% Confidence Intervals, using the Mantel-Haenszel method with random effects.



## ONLINE SUPPORTING MATERIAL

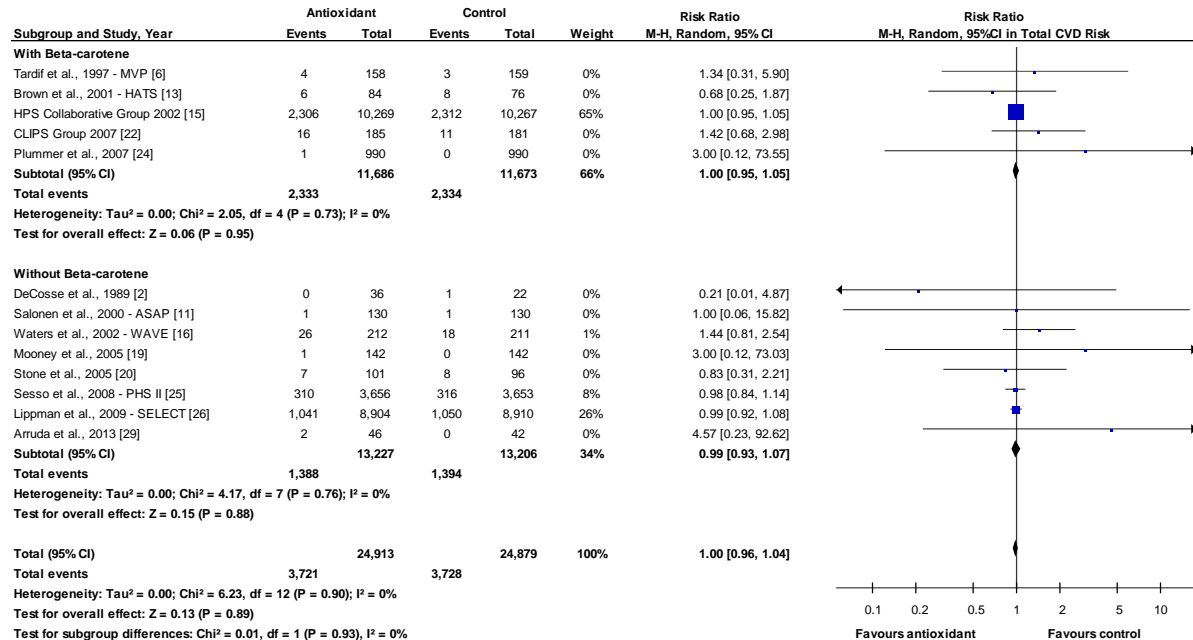

### Supplementary Figure 79. Sensitivity analysis of antioxidant supplementation and total CVD risk for studies with and without beta-carotene.

M-H, Mantel-Haenszel, CVD, cardiovascular disease. The diamond represents the pooled risk estimate. Inter-study heterogeneity was tested using the Cochran Q statistic (Chi<sup>2</sup>) at a significance level of P < 0.10, and quantified by the I<sup>2</sup> statistic. An I<sup>2</sup> value ≥ 50% is considered to indicate substantial heterogeneity. All results are presented as risk ratios with 95% Confidence Intervals, using the Mantel-Haenszel method with random effects model.

## ONLINE SUPPORTING MATERIAL

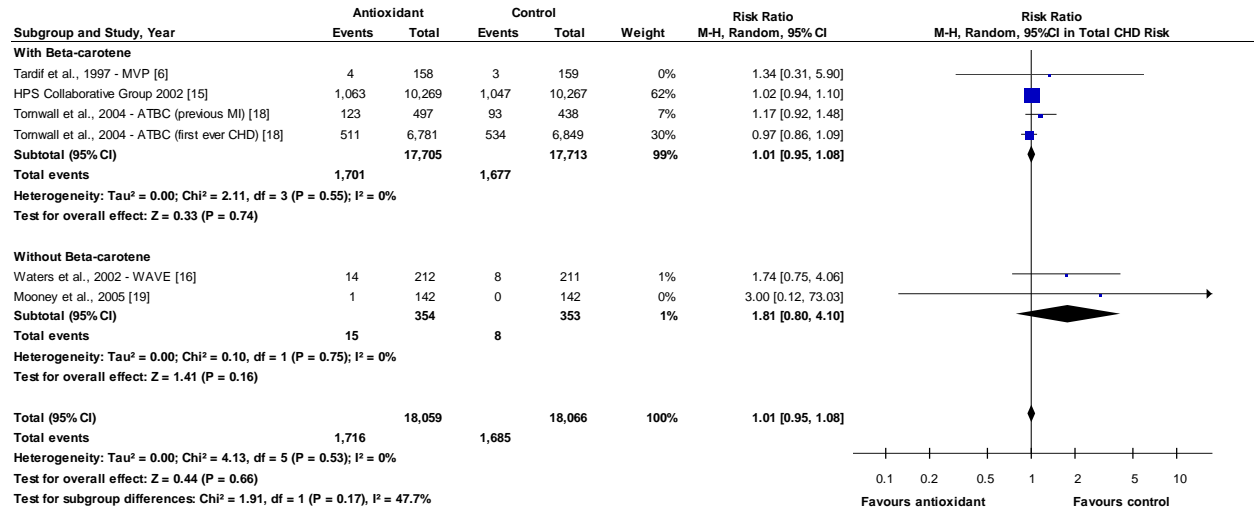

**Supplementary Figure 80. Sensitivity analysis of antioxidant supplementation and total CHD risk for studies with and without beta-carotene.** M-H, Mantel-Haenszel, CHD, coronary heart disease. The diamond represents the pooled risk estimate. Inter-study heterogeneity was tested using the Cochran Q statistic (Chi<sup>2</sup>) at a significance level of P < 0.10, and quantified by the I<sup>2</sup> statistic. An I<sup>2</sup> value ≥ 50% is considered to indicate substantial heterogeneity. All results are presented as risk ratios with 95% Confidence Intervals, using the Mantel-Haenszel method with random effects model.

## ONLINE SUPPORTING MATERIAL

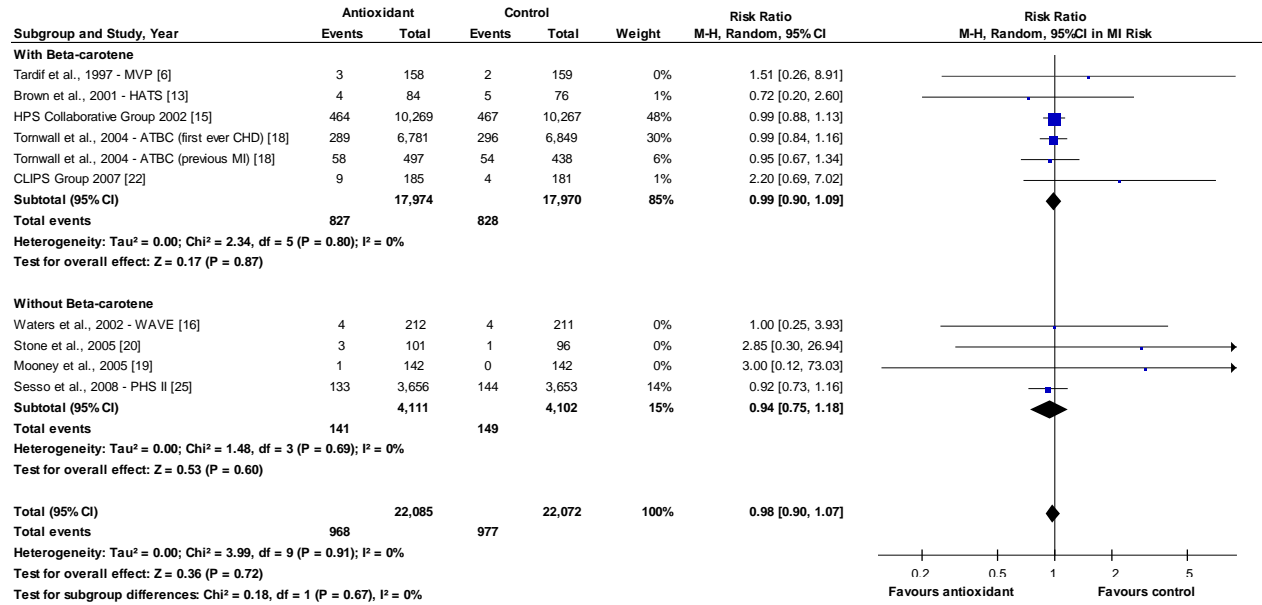

**Supplementary Figure 81. Sensitivity analysis of antioxidant supplementation and MI risk for studies with and without beta-carotene.** M-H, Mantel-Haenszel, MI, myocardial infarction. The diamond represents the pooled risk estimate. Inter-study heterogeneity was tested using the Cochran Q statistic (Chi<sup>2</sup>) at a significance level of P < 0.10, and quantified by the I<sup>2</sup> statistic. An I<sup>2</sup> value ≥ 50% is considered to indicate substantial heterogeneity. All results are presented as risk ratios with 95% Confidence Intervals, using the Mantel-Haenszel method with random effects model.

## ONLINE SUPPORTING MATERIAL

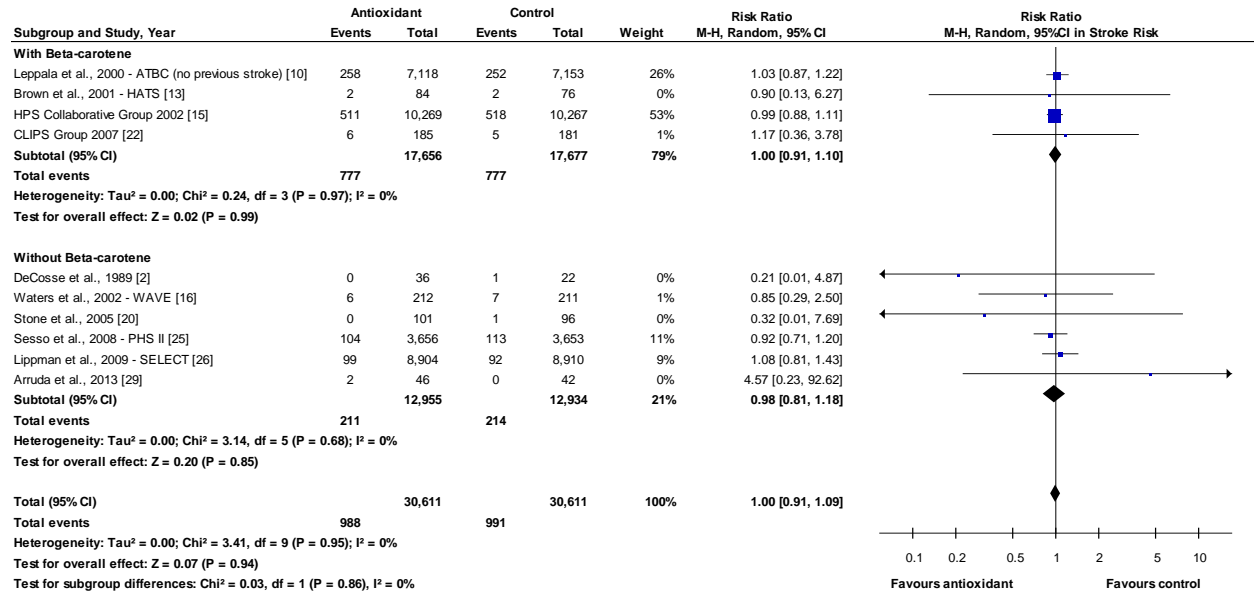

**Supplementary Figure 82. Sensitivity analysis of antioxidant supplementation and stroke risk for studies with and without beta-carotene.** M-H, Mantel-Haenszel. The diamond represents the pooled risk estimate. Inter-study heterogeneity was tested using the Cochran Q statistic (Chi<sup>2</sup>) at a significance level of P < 0.10, and quantified by the I<sup>2</sup> statistic. An I<sup>2</sup> value ≥ 50% is considered to indicate substantial heterogeneity. All results are presented as risk ratios with 95% Confidence Intervals, using the Mantel-Haenszel method with random effects model.

## ONLINE SUPPORTING MATERIAL

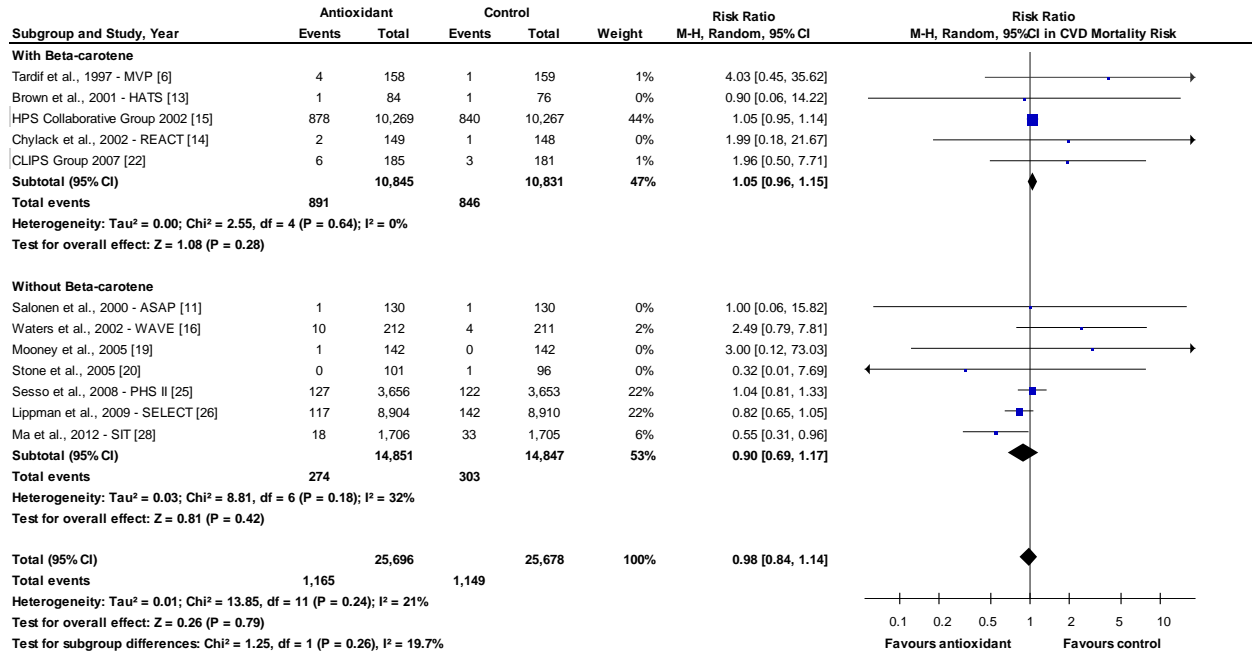

### Supplementary Figure 83. Sensitivity analysis of antioxidant supplementation and CVD mortality risk for studies with and without beta-carotene.

M-H, Mantel-Haenszel, CVD, cardiovascular disease. The diamond represents the pooled risk estimate. Inter-study heterogeneity was tested using the Cochran Q statistic (Chi<sup>2</sup>) at a significance level of P < 0.10, and quantified by the I<sup>2</sup> statistic. An I<sup>2</sup> value ≥ 50% is considered to indicate substantial heterogeneity. All results are presented as risk ratios with 95% Confidence Intervals, using the Mantel-Haenszel method with random effects model.

## ONLINE SUPPORTING MATERIAL

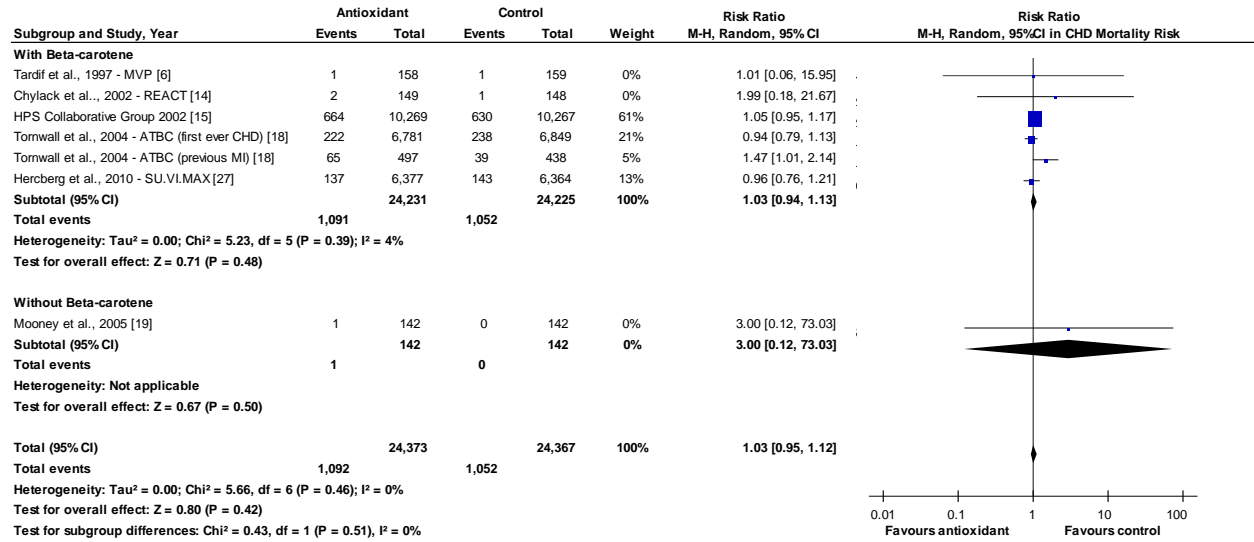

**Supplementary Figure 84. Sensitivity analysis of antioxidant supplementation and CHD mortality risk for studies with and without beta-carotene.** M-H, Manthel-Haenszel, CHD, coronary heart disease. The diamond represents the pooled risk estimate. Inter-study heterogeneity was tested using the Cochran Q statistic (Chi<sup>2</sup>) at a significance level of P < 0.10, and quantified by the I<sup>2</sup> statistic. An I<sup>2</sup> value ≥ 50% is considered to indicate substantial heterogeneity. All results are presented as risk ratios with 95% Confidence Intervals, using the Manthel-Haenszel method with random effects model.

## ONLINE SUPPORTING MATERIAL

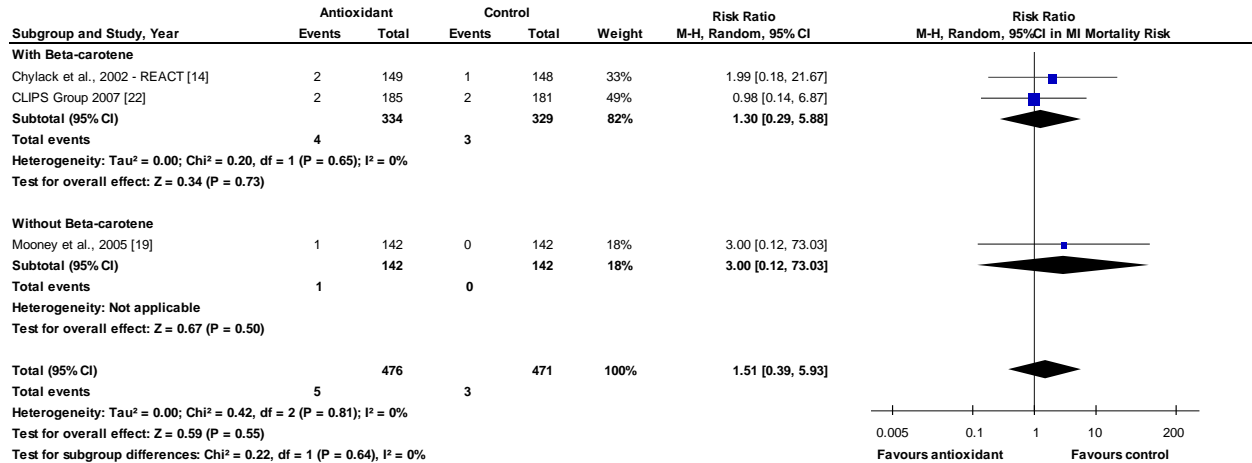

**Supplementary Figure 85. Sensitivity analysis of antioxidant supplementation and MI**

**mortality risk for studies with and without beta-carotene.** M-H, Mantel-Haenszel, MI, myocardial infarction. The diamond represents the pooled risk estimate. Inter-study heterogeneity was tested using the Cochran Q statistic (Chi<sup>2</sup>) at a significance level of P < 0.10, and quantified by the I<sup>2</sup> statistic. An I<sup>2</sup> value ≥ 50% is considered to indicate substantial heterogeneity. All results are presented as risk ratios with 95% Confidence Intervals, using the Mantel-Haenszel method with random effects model.

## ONLINE SUPPORTING MATERIAL

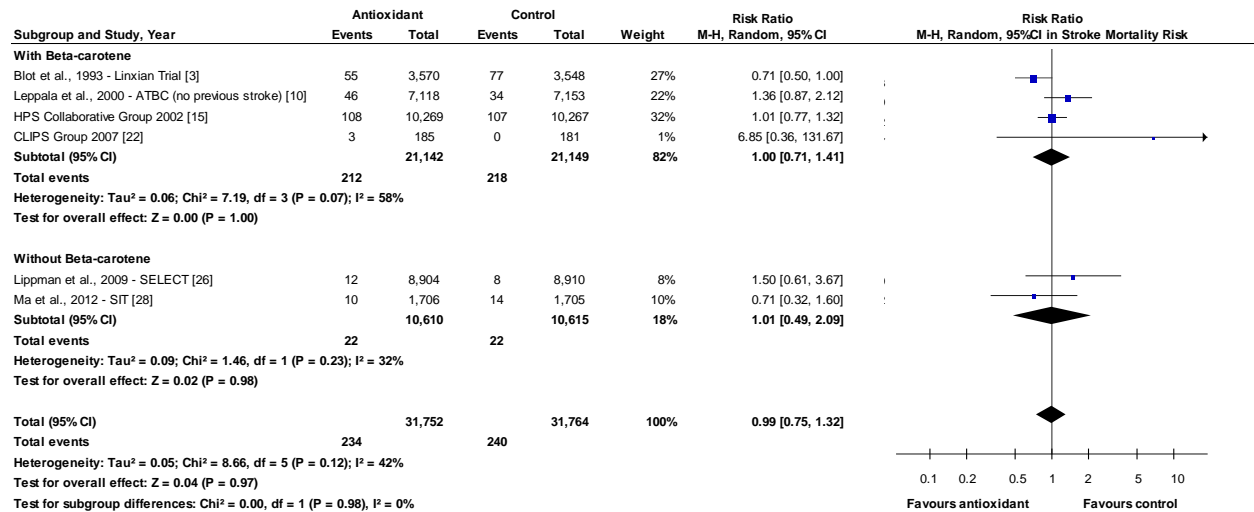

**Supplementary Figure 86. Sensitivity analysis of antioxidant supplementation and stroke mortality risk for studies with and without beta-carotene.** M-H, Manthel-Haenszel. The diamond represents the pooled risk estimate. Inter-study heterogeneity was tested using the Cochran Q statistic (Chi<sup>2</sup>) at a significance level of P < 0.10, and quantified by the I<sup>2</sup> statistic. An I<sup>2</sup> value ≥ 50% is considered to indicate substantial heterogeneity. All results are presented as risk ratios with 95% Confidence Intervals, using the Manthel-Haenszel method with random effects model.



## ONLINE SUPPORTING MATERIAL

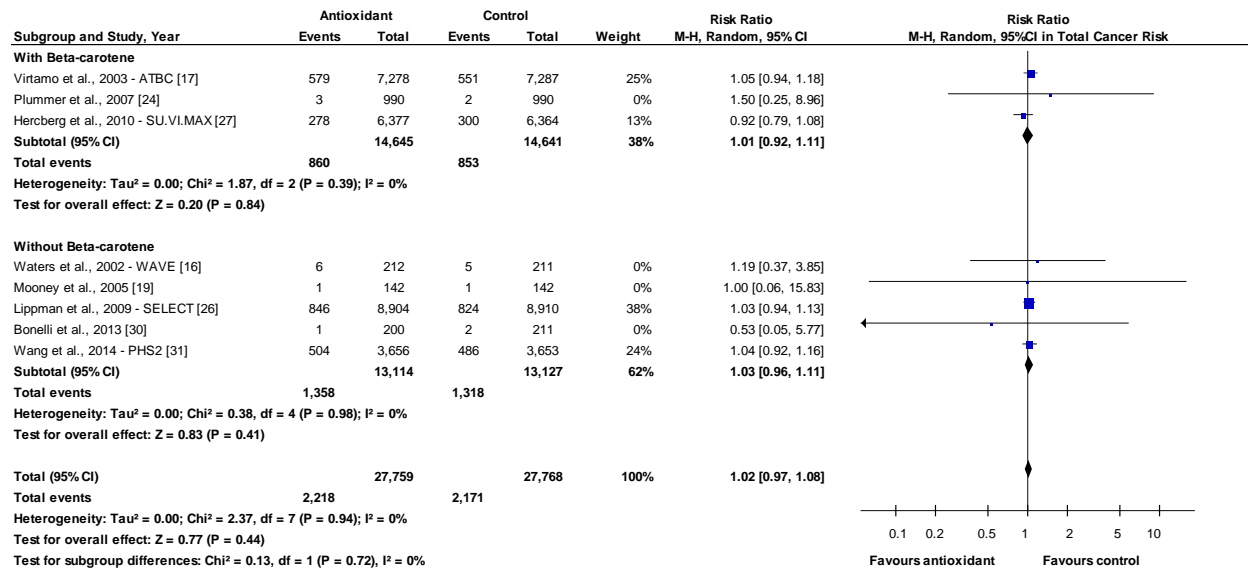

**Supplementary Figure 87. Sensitivity analysis of antioxidant supplementation and total cancer risk for studies with and without beta-carotene.** M-H, Mantel-Haenszel. The diamond represents the pooled risk estimate. Inter-study heterogeneity was tested using the Cochran Q statistic (Chi<sup>2</sup>) at a significance level of P < 0.10, and quantified by the I<sup>2</sup> statistic. An I<sup>2</sup> value ≥ 50% is considered to indicate substantial heterogeneity. All results are presented as risk ratios with 95% Confidence Intervals, using the Mantel-Haenszel method with random effects model.

## ONLINE SUPPORTING MATERIAL

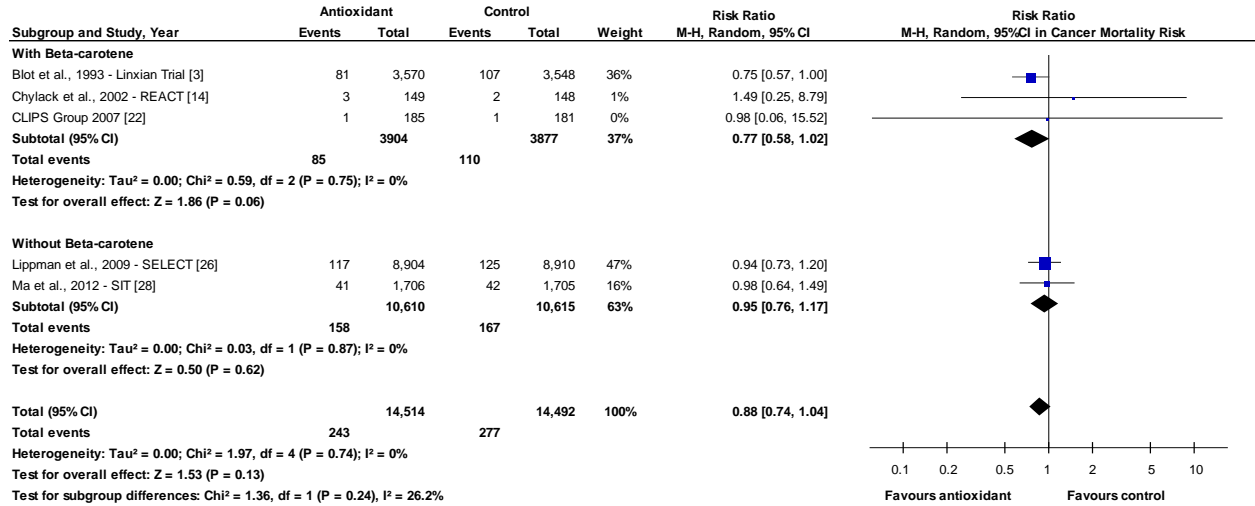

**Supplementary Figure 88. Sensitivity analysis of antioxidant supplementation and cancer mortality risk for studies with and without beta-carotene.** M-H, Manthel-Haenszel. The diamond represents the pooled risk estimate. Inter-study heterogeneity was tested using the Cochran Q statistic (Chi<sup>2</sup>) at a significance level of P < 0.10, and quantified by the I<sup>2</sup> statistic. An I<sup>2</sup> value ≥ 50% is considered to indicate substantial heterogeneity. All results are presented as risk ratios with 95% Confidence Intervals, using the Manthel-Haenszel method with random effects model.

## ONLINE SUPPORTING MATERIAL

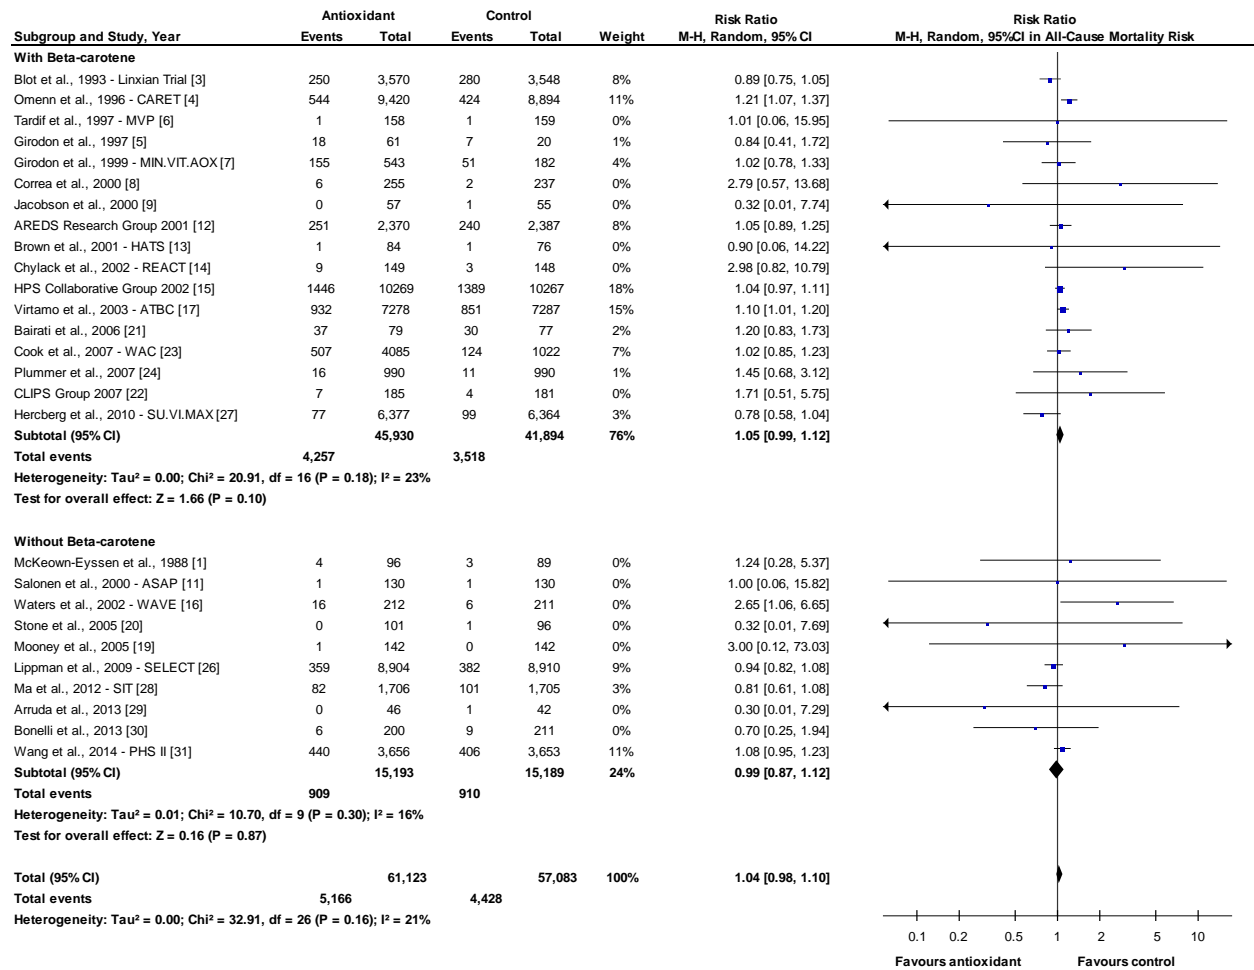

**Supplementary Figure 89. Sensitivity analysis of antioxidant supplementation and all-cause mortality risk for studies with and without beta-carotene.** M-H, Mantel-Haenszel. \*Jacobson et al., 2000 – Data retrieved from meta-analysis Bjelakovic 2012 (44). The diamond represents the pooled risk estimate. Inter-study heterogeneity was tested using the Cochran Q statistic (Chi<sup>2</sup>) at a significance level of P < 0.10, and quantified by the I<sup>2</sup> statistic. An I<sup>2</sup> value ≥ 50% is considered to indicate substantial heterogeneity. All results are presented as risk ratios with 95% Confidence Intervals, using the Mantel-Haenszel method with random.

## ONLINE SUPPORTING MATERIAL

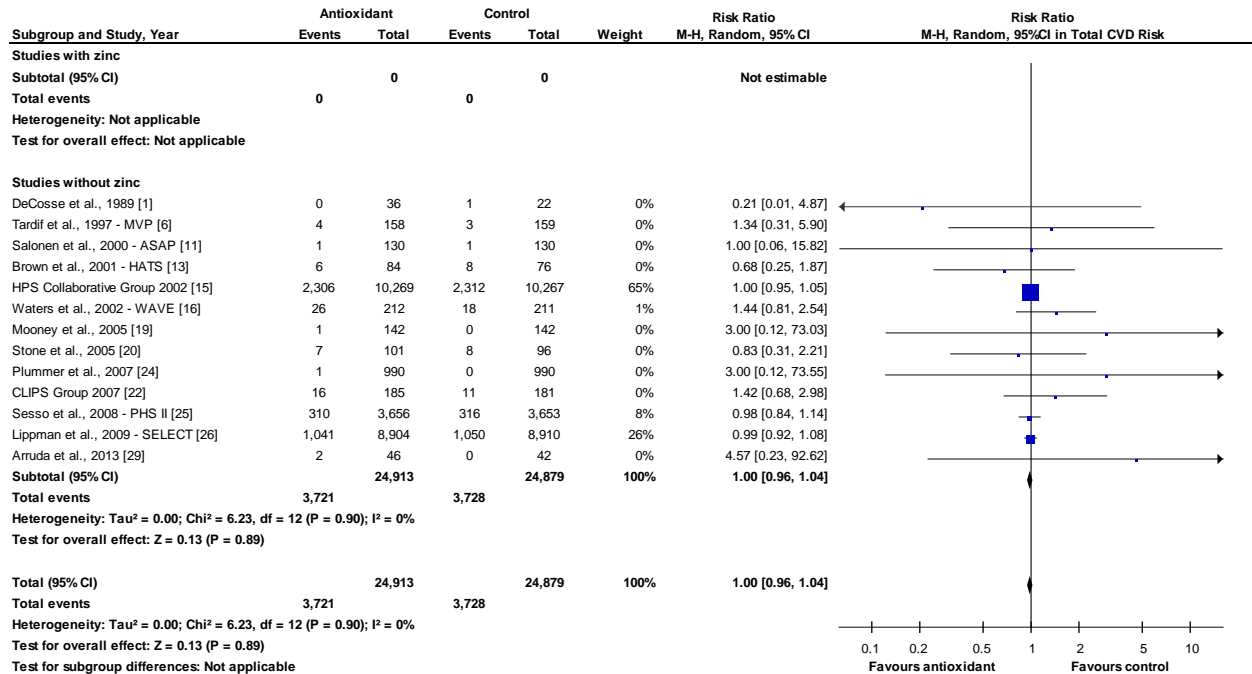

**Supplementary Figure 90. Sensitivity analysis of antioxidant supplementation and total CVD risk for studies with and without zinc.** M-H, Mantel-Haenszel, CVD, cardiovascular disease. The diamond represents the pooled risk estimate. Inter-study heterogeneity was tested using the Cochran Q statistic (Chi<sup>2</sup>) at a significance level of P < 0.10, and quantified by the I<sup>2</sup> statistic. An I<sup>2</sup> value ≥ 50% is considered to indicate substantial heterogeneity. All results are presented as risk ratios with 95% Confidence Intervals, using the Mantel-Haenszel method with random effects model.

## ONLINE SUPPORTING MATERIAL

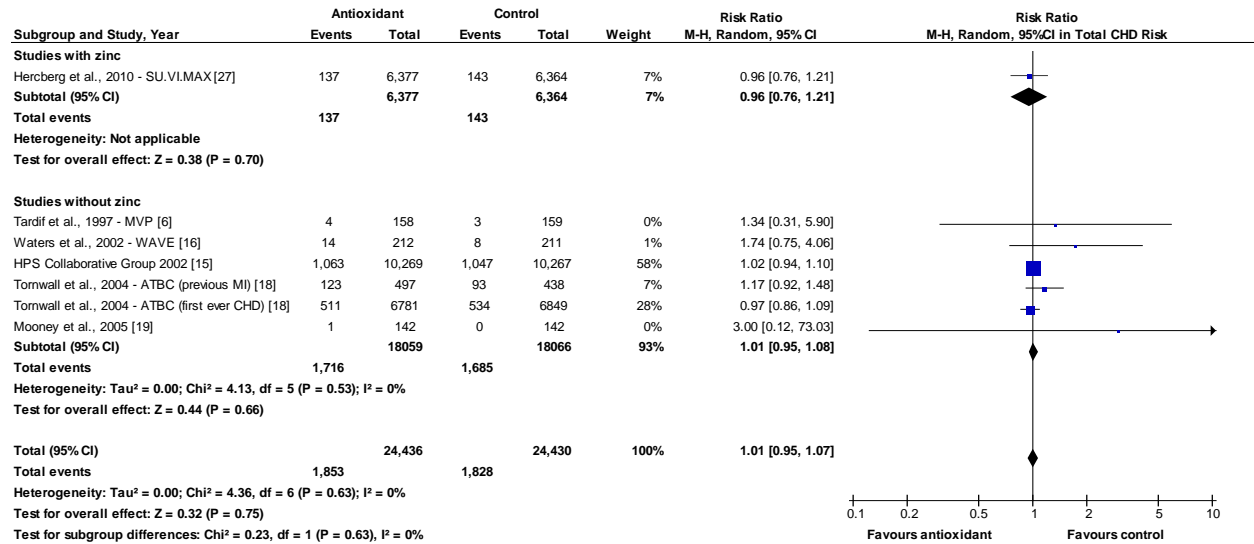

**Supplementary Figure 91. Sensitivity analysis of antioxidant supplementation and total CHD risk for studies with and without zinc.** Manthel-Haenszel, CHD, coronary heart disease. The diamond represents the pooled risk estimate. Inter-study heterogeneity was tested using the Cochran Q statistic (Chi<sup>2</sup>) at a significance level of P < 0.10, and quantified by the I<sup>2</sup> statistic. An I<sup>2</sup> value ≥ 50% is considered to indicate substantial heterogeneity. All results are presented as risk ratios with 95% Confidence Intervals, using the Manthel-Haenszel method with random effects model.

## ONLINE SUPPORTING MATERIAL

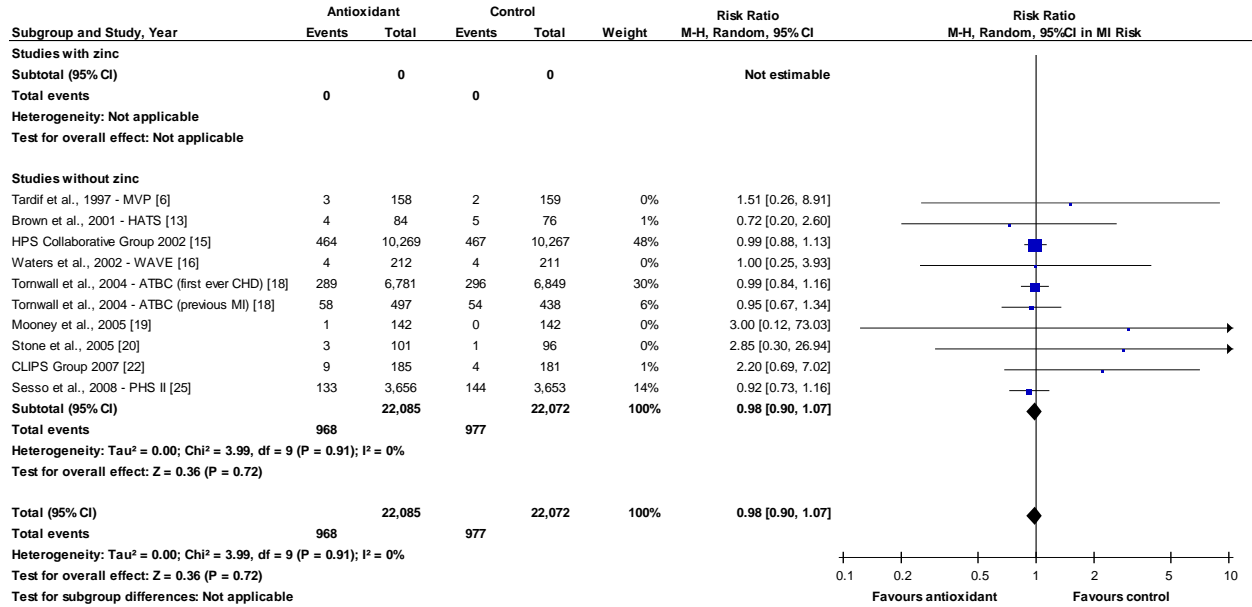

**Supplementary Figure 92. Sensitivity analysis of antioxidant supplementation and MI risk for studies with and without zinc.** M-H, Manthel-Haenszel, MI, myocardial infarction. The diamond represents the pooled risk estimate. Inter-study heterogeneity was tested using the Cochran Q statistic (Chi<sup>2</sup>) at a significance level of P < 0.10, and quantified by the I<sup>2</sup> statistic. An I<sup>2</sup> value ≥ 50% is considered to indicate substantial heterogeneity. All results are presented as risk ratios with 95% Confidence Intervals, using the Manthel-Haenszel method with random effects model.

## ONLINE SUPPORTING MATERIAL

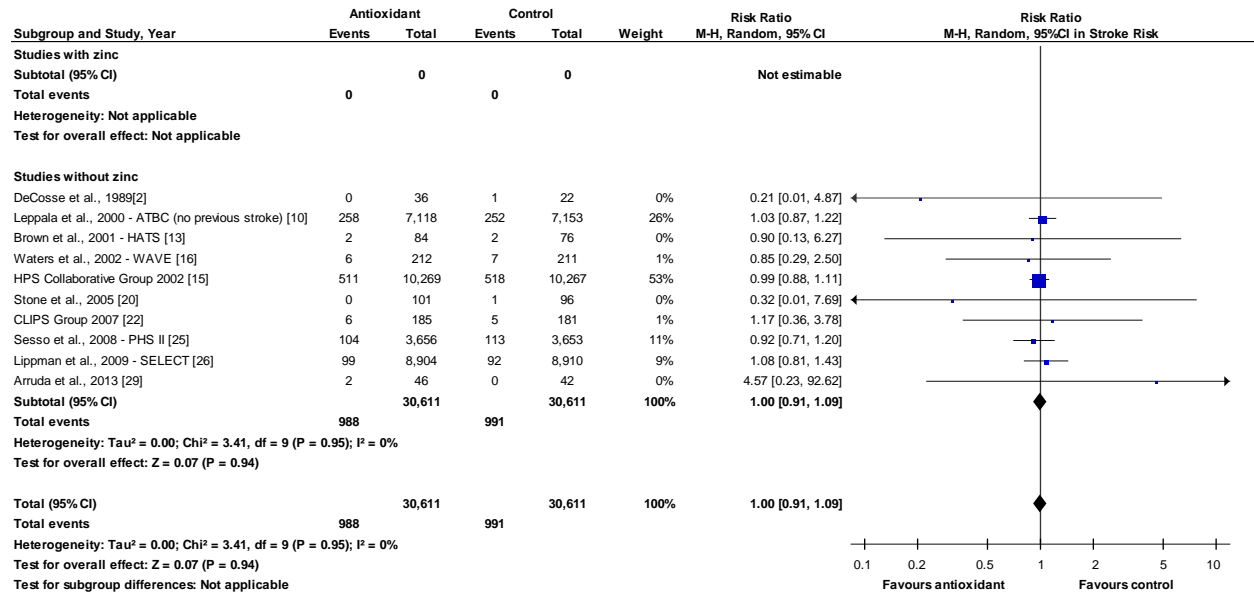

**Supplementary Figure 93. Sensitivity analysis of antioxidant supplementation and stroke risk for studies with and without zinc.** M-H, Mantel-Haenszel. The diamond represents the pooled risk estimate. Inter-study heterogeneity was tested using the Cochran Q statistic (Chi<sup>2</sup>) at a significance level of P < 0.10, and quantified by the I<sup>2</sup> statistic. An I<sup>2</sup> value ≥ 50% is considered to indicate substantial heterogeneity. All results are presented as risk ratios with 95% Confidence Intervals, using the Mantel-Haenszel method with random effects model.

## ONLINE SUPPORTING MATERIAL

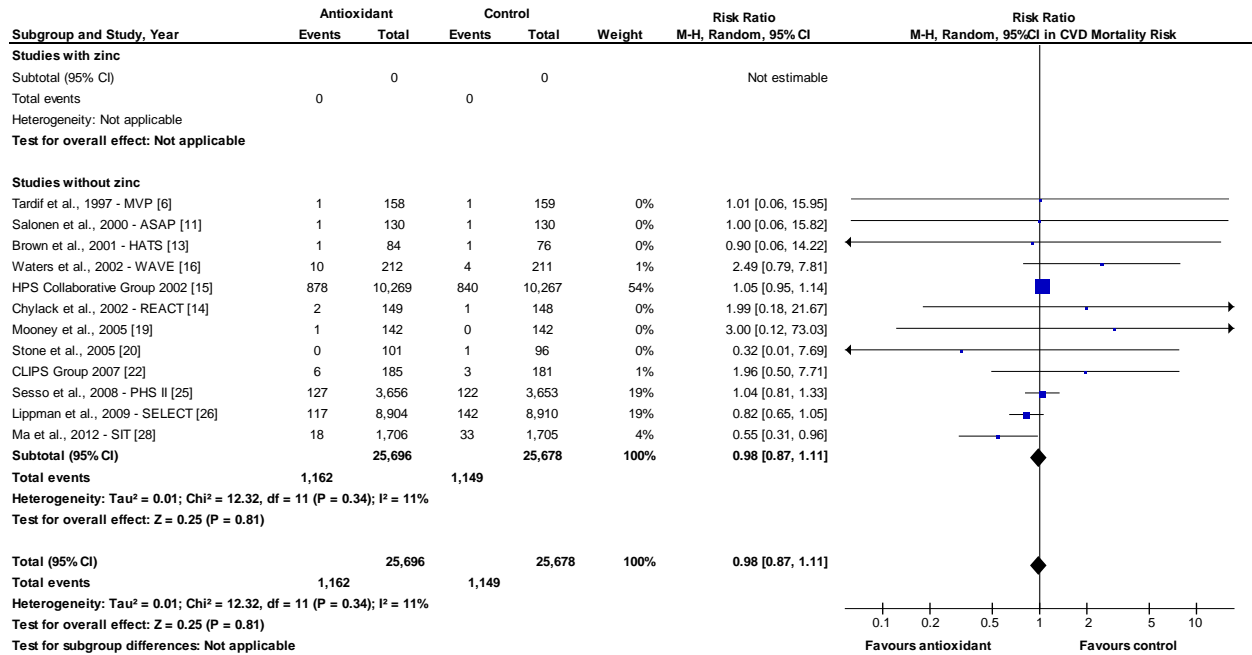

### Supplementary Figure 94. Sensitivity analysis of antioxidant supplementation and CVD mortality risk for studies with and without zinc.

M-H, Mantel-Haenszel, CVD, cardiovascular disease. The diamond represents the pooled risk estimate. Inter-study heterogeneity was tested using the Cochran Q statistic (Chi<sup>2</sup>) at a significance level of P < 0.10, and quantified by the I<sup>2</sup> statistic. An I<sup>2</sup> value ≥ 50% is considered to indicate substantial heterogeneity. All results are presented as risk ratios with 95% Confidence Intervals, using the Mantel-Haenszel method with random effects model.



## ONLINE SUPPORTING MATERIAL

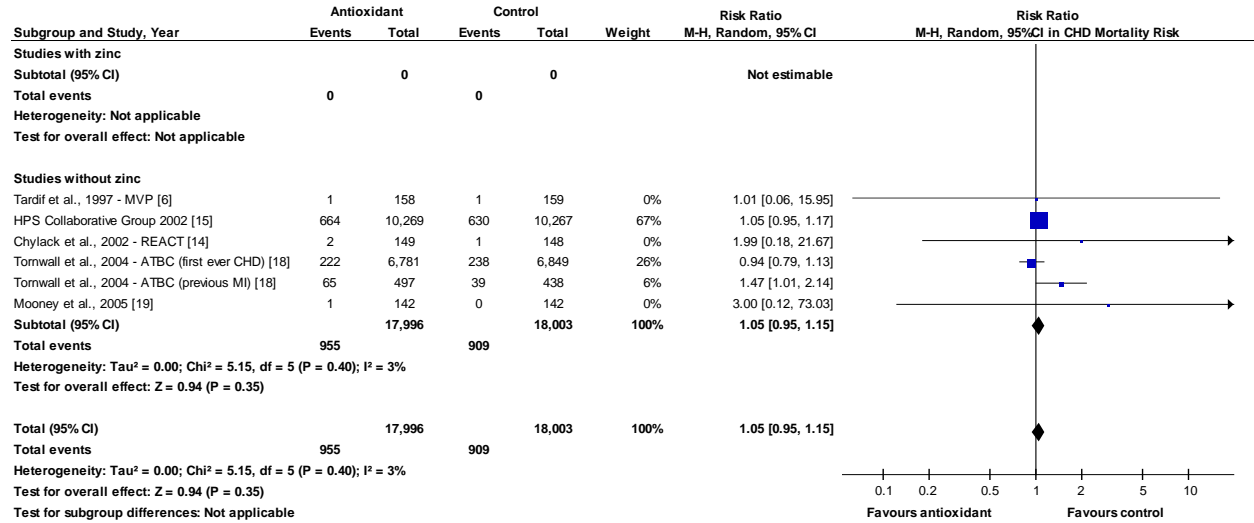

**Supplementary Figure 95. Sensitivity analysis of antioxidant supplementation and CHD mortality risk for studies with and without zinc.** M-H, Manthel-Haenszel, CHD, coronary heart disease. The diamond represents the pooled risk estimate. Inter-study heterogeneity was tested using the Cochran Q statistic (Chi<sup>2</sup>) at a significance level of P < 0.10, and quantified by the I<sup>2</sup> statistic. An I<sup>2</sup> value ≥ 50% is considered to indicate substantial heterogeneity. All results are presented as risk ratios with 95% Confidence Intervals, using the Manthel-Haenszel method with random effects model.

## ONLINE SUPPORTING MATERIAL

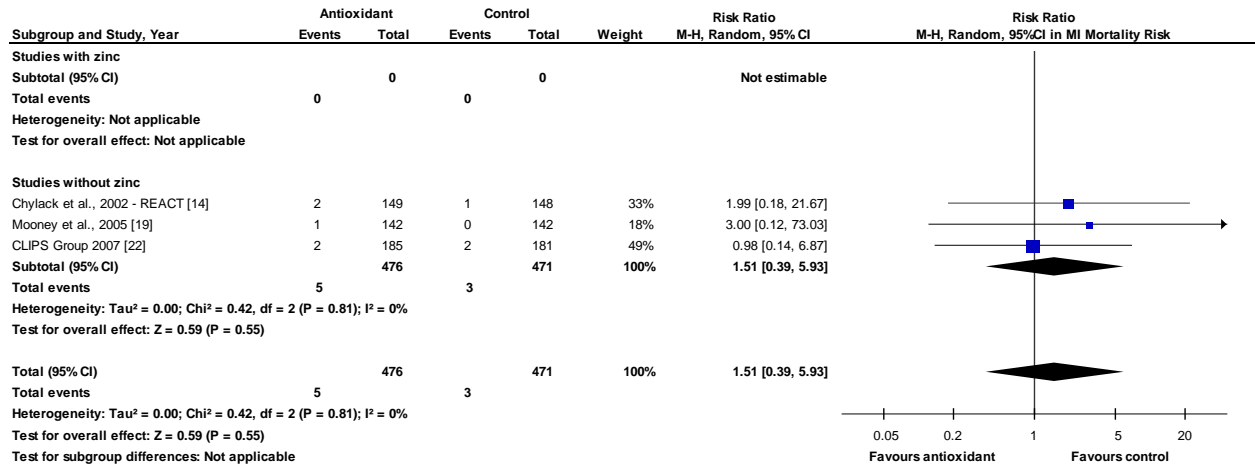

**Supplementary Figure 96. Sensitivity analysis of antioxidant supplementation and MI mortality risk for studies with and without zinc.** M-H, Manthel-Haenszel, MI, myocardial infarction. The diamond represents the pooled risk estimate. Inter-study heterogeneity was tested using the Cochran Q statistic (Chi<sup>2</sup>) at a significance level of P < 0.10, and quantified by the I<sup>2</sup> statistic. An I<sup>2</sup> value ≥ 50% is considered to indicate substantial heterogeneity. All results are presented as risk ratios with 95% Confidence Intervals, using the Manthel-Haenszel method with random effects model.

## ONLINE SUPPORTING MATERIAL

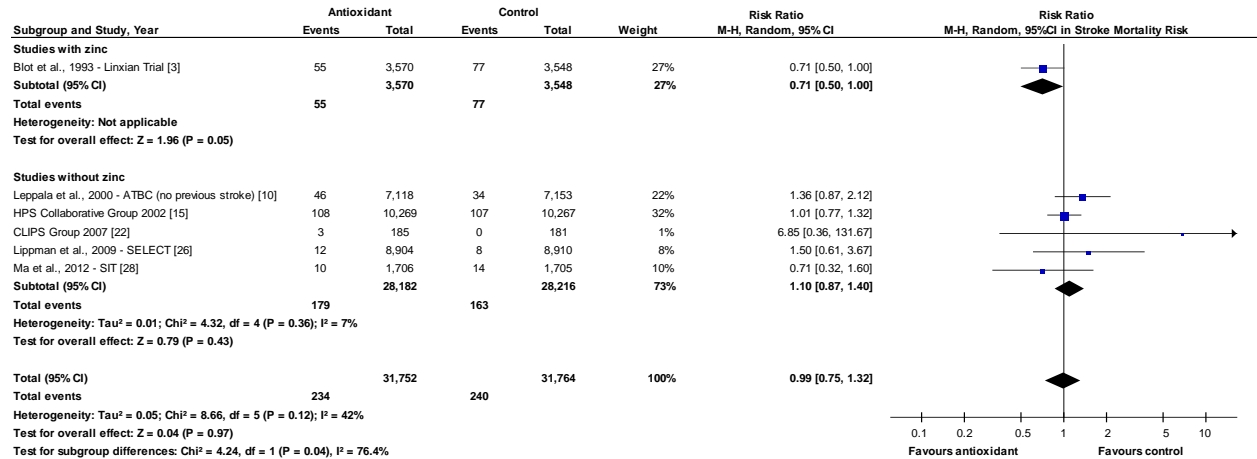

**Supplementary Figure 97. Sensitivity analysis of antioxidant supplementation and stroke mortality risk for studies with and without zinc.** NNT for antioxidant supplementation and stroke mortality risk for studies with zinc is 159. M-H, Mantel-Haenszel. The diamond represents the pooled risk estimate. Inter-study heterogeneity was tested using the Cochran Q statistic (Chi<sup>2</sup>) at a significance level of P < 0.10, and quantified by the I<sup>2</sup> statistic. An I<sup>2</sup> value ≥ 50% is considered to indicate substantial heterogeneity. All results are presented as risk ratios with 95% Confidence Intervals, using the Mantel-Haenszel method with random effects model.

## ONLINE SUPPORTING MATERIAL

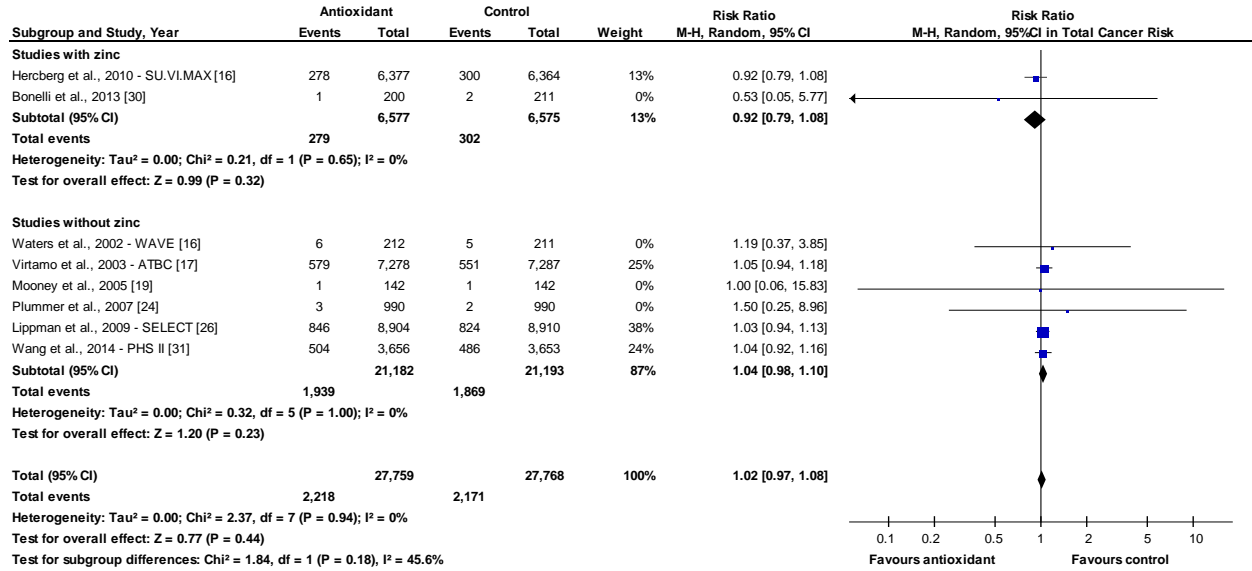

**Supplementary Figure 98. Sensitivity analysis of antioxidant supplementation and total cancer risk for studies with and without zinc.** M-H, Mantel-Haenszel. The diamond represents the pooled risk estimate. Inter-study heterogeneity was tested using the Cochran Q statistic (Chi<sup>2</sup>) at a significance level of P < 0.10, and quantified by the I<sup>2</sup> statistic. An I<sup>2</sup> value ≥ 50% is considered to indicate substantial heterogeneity. All results are presented as risk ratios with 95% Confidence Intervals, using the Mantel-Haenszel method with random effects model.

## ONLINE SUPPORTING MATERIAL

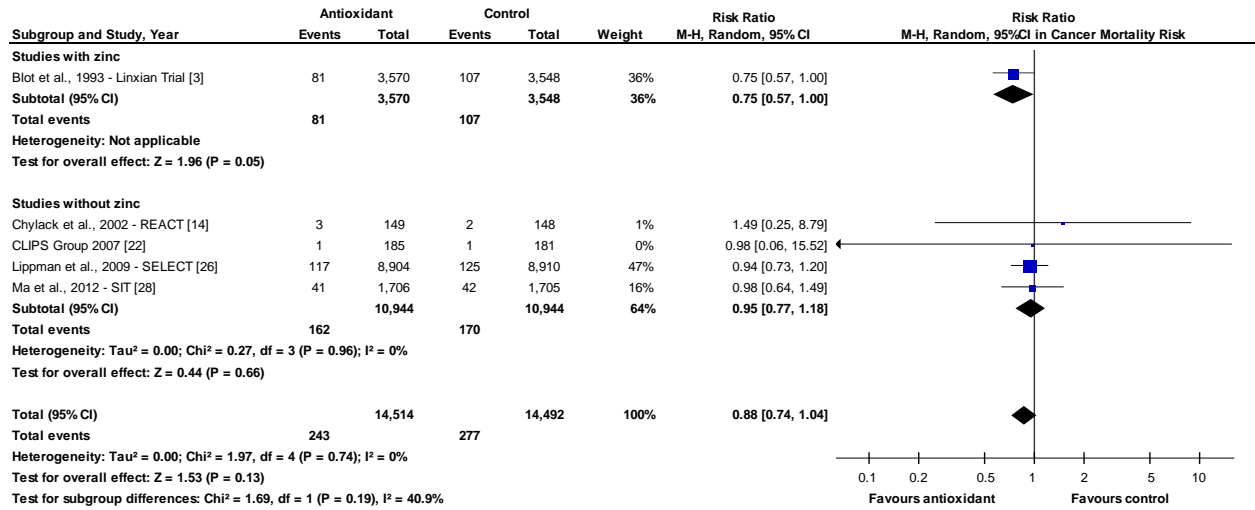

**Supplementary Figure 99. Sensitivity analysis of antioxidant supplementation and cancer mortality risk for studies with and without zinc.** M-H, Mantel-Haenszel. The diamond represents the pooled risk estimate. Inter-study heterogeneity was tested using the Cochran Q statistic (Chi<sup>2</sup>) at a significance level of P < 0.10, and quantified by the I<sup>2</sup> statistic. An I<sup>2</sup> value ≥ 50% is considered to indicate substantial heterogeneity. All results are presented as risk ratios with 95% Confidence Intervals, using the Mantel-Haenszel method with random effects model.

## ONLINE SUPPORTING MATERIAL

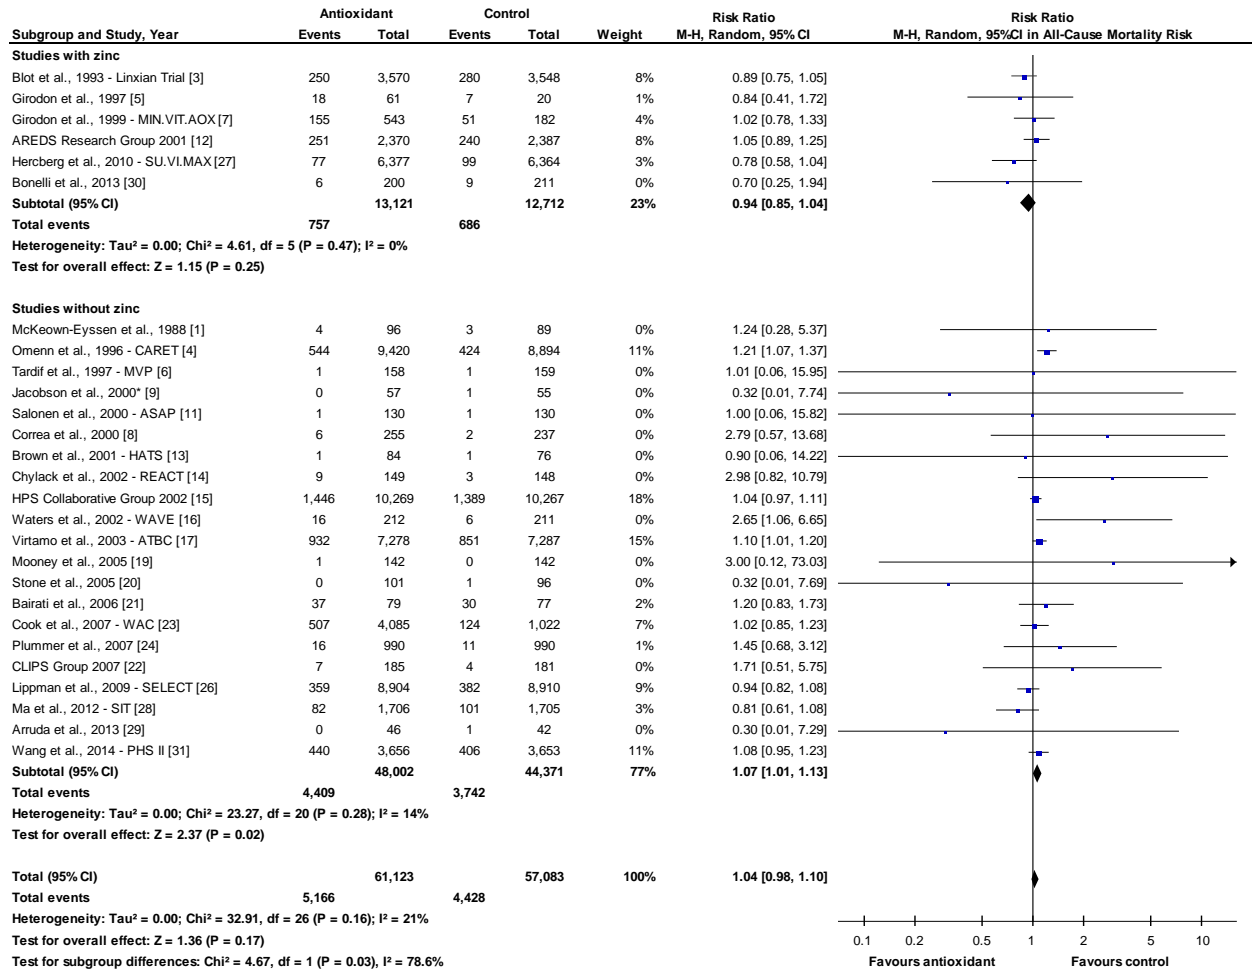

**Supplementary Figure 100. Sensitivity analysis of antioxidant supplementation and all-cause mortality risk for studies with and without zinc.** NNH for antioxidant supplementation and all-cause mortality risk for studies without zinc is 169. M-H, Mantel-Haenszel. \***Jacobson et al., 2000 – Data retrieved from meta-analysis Bjelakovic 2012 (44).** The diamond represents the pooled risk estimate. Inter-study heterogeneity was tested using the Cochran Q statistic (Chi<sup>2</sup>) at a significance level of P < 0.10, and quantified by the I<sup>2</sup> statistic. An I<sup>2</sup> value ≥ 50% is considered to indicate substantial heterogeneity. All results are presented as risk ratios with 95% Confidence Intervals, using the Mantel-Haenszel method with random effects model.

## ONLINE SUPPORTING MATERIAL

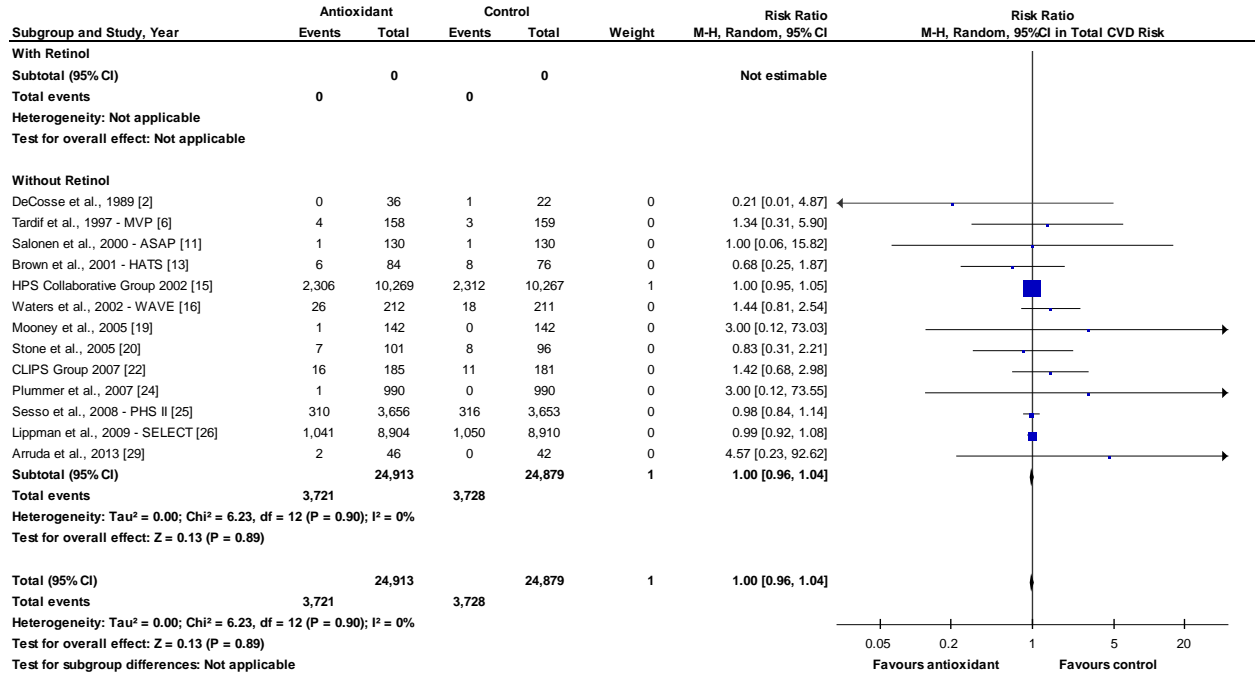

**Supplementary Figure 101. Sensitivity analysis of antioxidant supplementation and total CVD risk for studies with and without retinol.** M-H, Mantel-Haenszel, CVD, cardiovascular disease. The diamond represents the pooled risk estimate. Inter-study heterogeneity was tested using the Cochran Q statistic (Chi<sup>2</sup>) at a significance level of P < 0.10, and quantified by the I<sup>2</sup> statistic. An I<sup>2</sup> value ≥ 50% is considered to indicate substantial heterogeneity. All results are presented as risk ratios with 95% Confidence Intervals, using the Mantel-Haenszel method with random effects model.

## ONLINE SUPPORTING MATERIAL

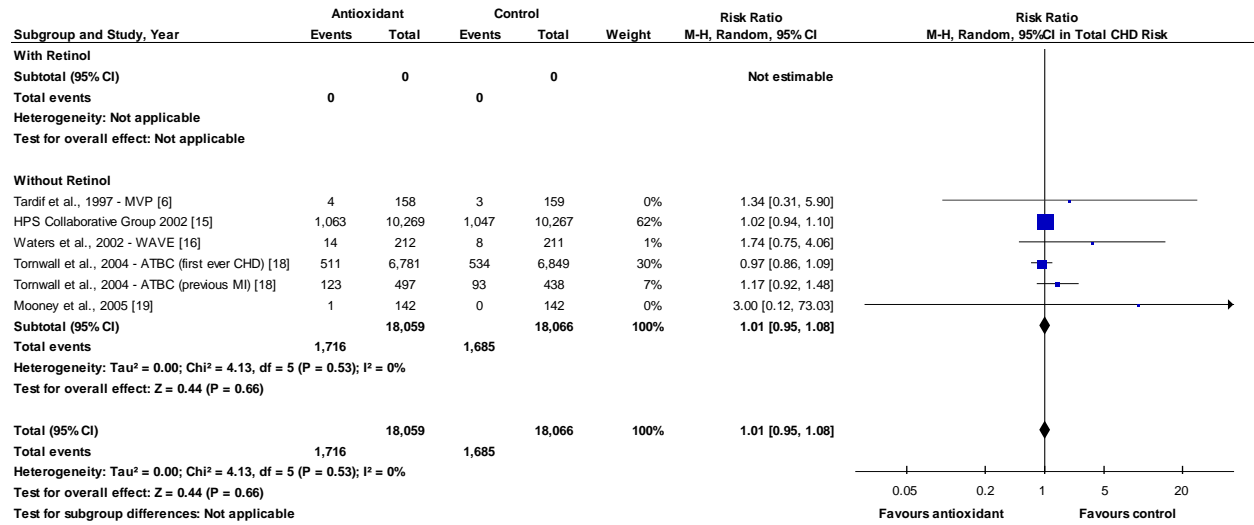

**Supplementary Figure 102. Sensitivity analysis of antioxidant supplementation and total CHD risk for studies with and without retinol.** M-H, Manthel-Haenszel, CHD, coronary heart disease. The diamond represents the pooled risk estimate. Inter-study heterogeneity was tested using the Cochran Q statistic (Chi<sup>2</sup>) at a significance level of P < 0.10, and quantified by the I<sup>2</sup> statistic. An I<sup>2</sup> value ≥ 50% is considered to indicate substantial heterogeneity. All results are presented as risk ratios with 95% Confidence Intervals, using the Manthel-Haenszel method with random effects model.



## ONLINE SUPPORTING MATERIAL

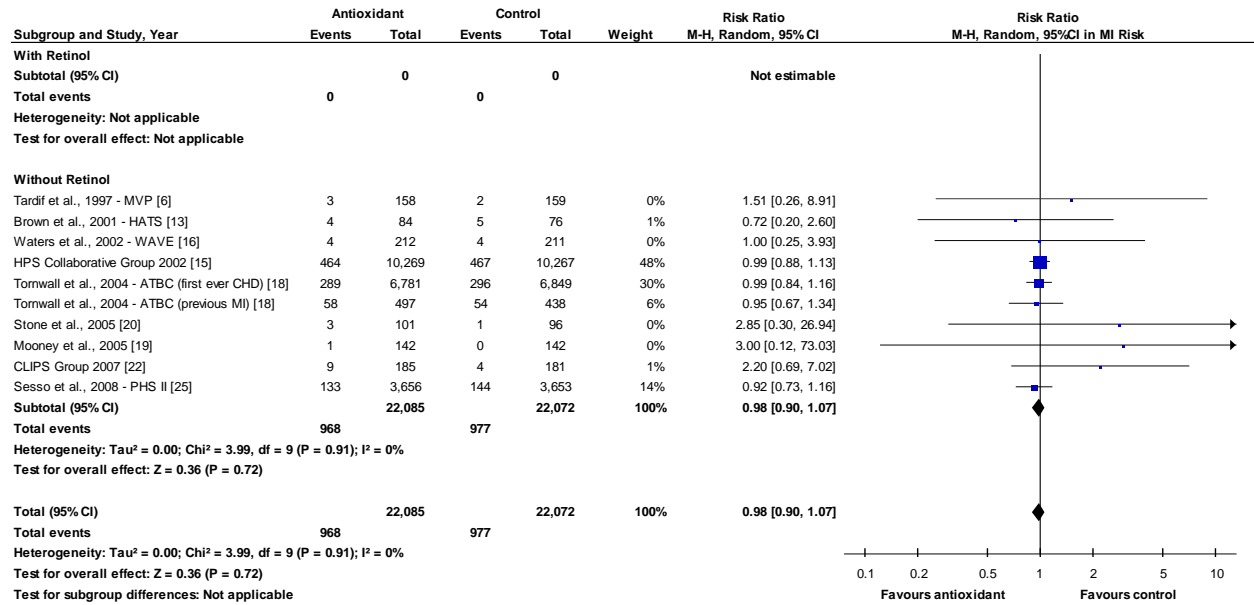

**Supplementary Figure 103. Sensitivity analysis of antioxidant supplementation and MI risk for studies with and without retinol.** M-H, Mantel-Haenszel, MI, myocardial infarction. The diamond represents the pooled risk estimate. Inter-study heterogeneity was tested using the Cochran Q statistic (Chi<sup>2</sup>) at a significance level of P < 0.10, and quantified by the I<sup>2</sup> statistic. An I<sup>2</sup> value ≥ 50% is considered to indicate substantial heterogeneity. All results are presented as risk ratios with 95% Confidence Intervals, using the Mantel-Haenszel method with random effects model.

## ONLINE SUPPORTING MATERIAL

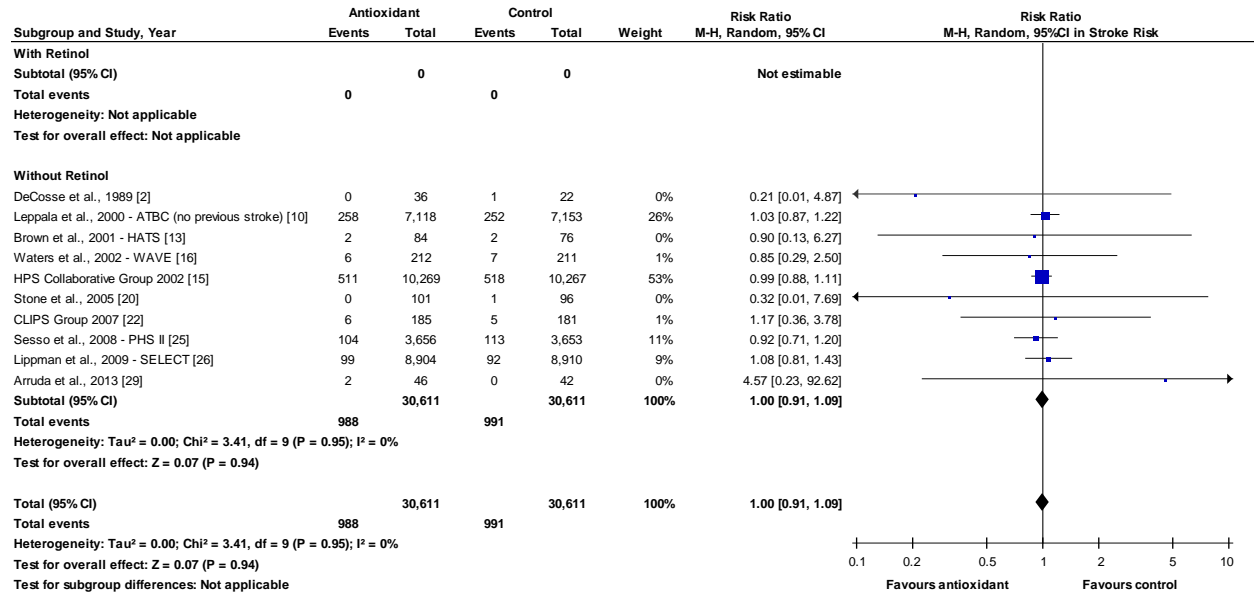

**Supplementary Figure 104. Sensitivity analysis of antioxidant supplementation and stroke risk for studies with and without retinol.** M-H, Mantel-Haenszel. The diamond represents the pooled risk estimate. Inter-study heterogeneity was tested using the Cochran Q statistic (Chi<sup>2</sup>) at a significance level of P < 0.10, and quantified by the I<sup>2</sup> statistic. An I<sup>2</sup> value ≥ 50% is considered to indicate substantial heterogeneity. All results are presented as risk ratios with 95% Confidence Intervals, using the Mantel-Haenszel method with random effects model.

## ONLINE SUPPORTING MATERIAL

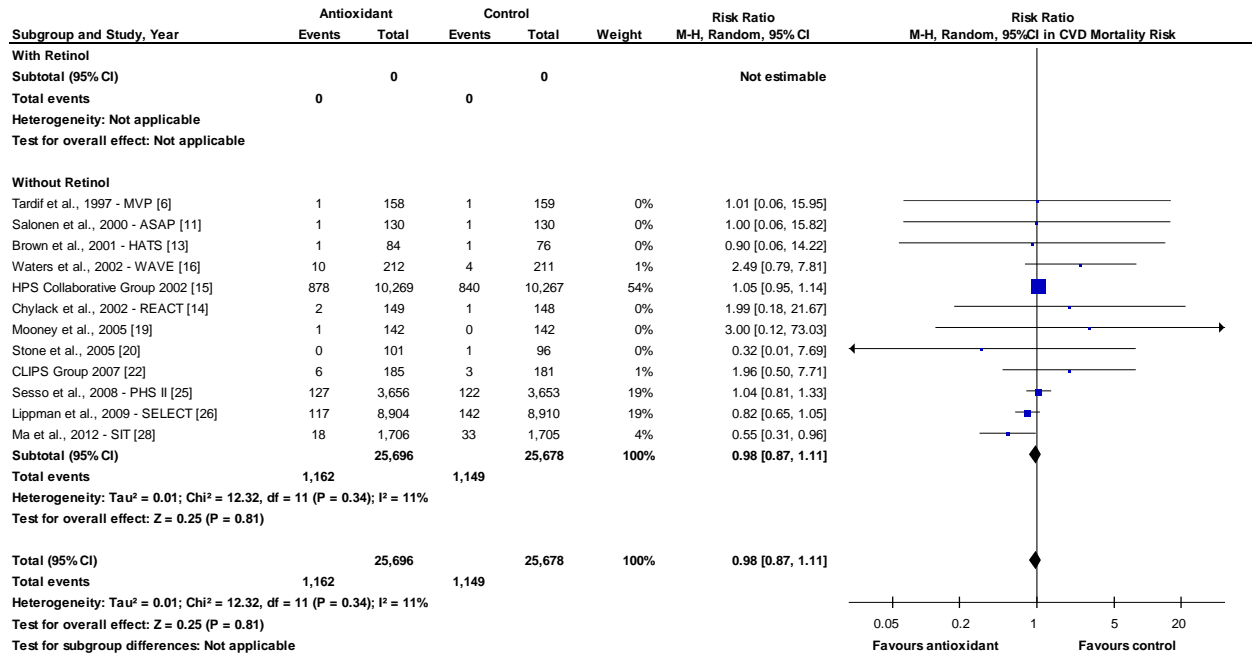

**Supplementary Figure 105. Sensitivity analysis of antioxidant supplementation and CVD mortality risk for studies with and without retinol.** M-H, Mantel-Haenszel, CVD, cardiovascular disease. The diamond represents the pooled risk estimate. Inter-study heterogeneity was tested using the Cochran Q statistic (Chi<sup>2</sup>) at a significance level of P < 0.10, and quantified by the I<sup>2</sup> statistic. An I<sup>2</sup> value ≥ 50% is considered to indicate substantial heterogeneity. All results are presented as risk ratios with 95% Confidence Intervals, using the Mantel-Haenszel method with random effects model.

## ONLINE SUPPORTING MATERIAL

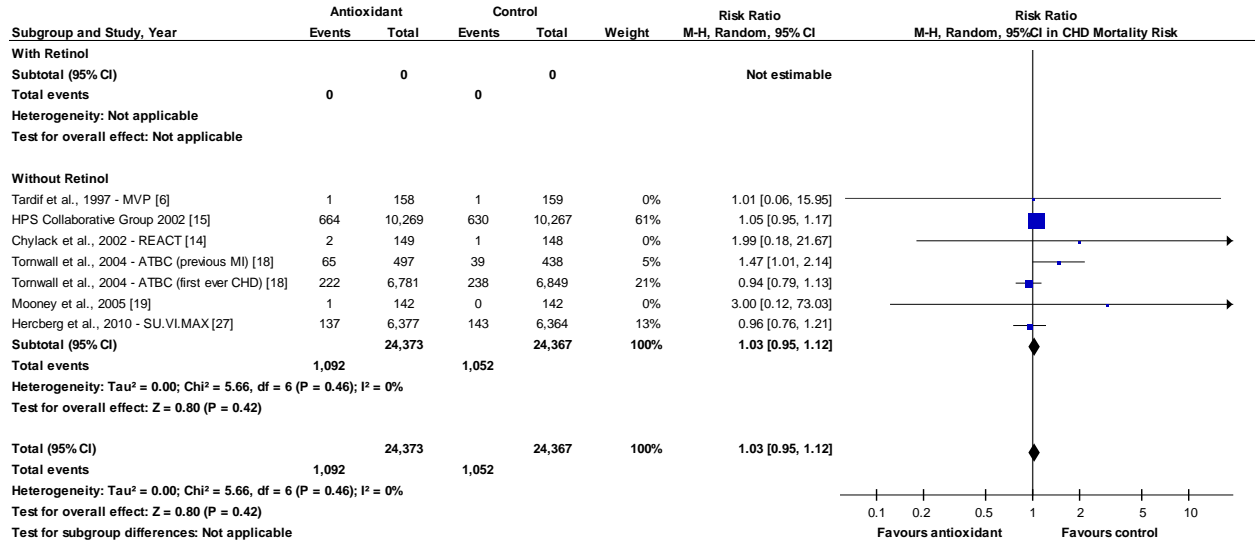

**Supplementary Figure 106. Sensitivity analysis of antioxidant supplementation and CHD mortality risk for studies with and without retinol.** M-H, Mantel-Haenszel, CHD, coronary heart disease. The diamond represents the pooled risk estimate. Inter-study heterogeneity was tested using the Cochran Q statistic (Chi<sup>2</sup>) at a significance level of P < 0.10, and quantified by the I<sup>2</sup> statistic. An I<sup>2</sup> value ≥ 50% is considered to indicate substantial heterogeneity. All results are presented as risk ratios with 95% Confidence Intervals, using the Mantel-Haenszel method with random effects model.

## ONLINE SUPPORTING MATERIAL

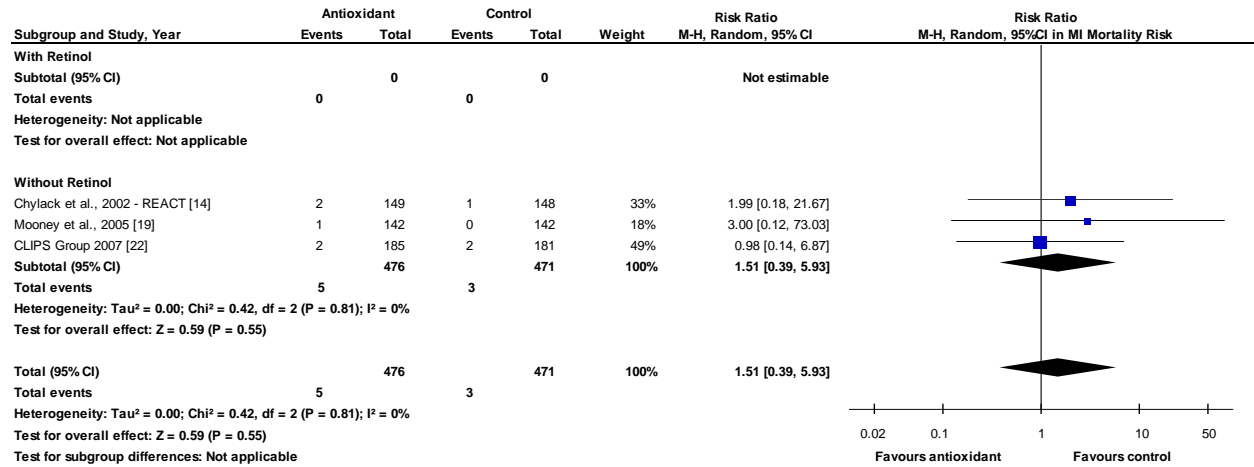

**Supplementary Figure 107. Sensitivity analysis of antioxidant supplementation and MI mortality risk for studies with and without retinol.** M-H, Mantel-Haenszel, MI, myocardial infarction. The diamond represents the pooled risk estimate. Inter-study heterogeneity was tested using the Cochran Q statistic (Chi<sup>2</sup>) at a significance level of P < 0.10, and quantified by the I<sup>2</sup> statistic. An I<sup>2</sup> value ≥ 50% is considered to indicate substantial heterogeneity. All results are presented as risk ratios with 95% Confidence Intervals, using the Mantel-Haenszel method with random effects model.

## ONLINE SUPPORTING MATERIAL

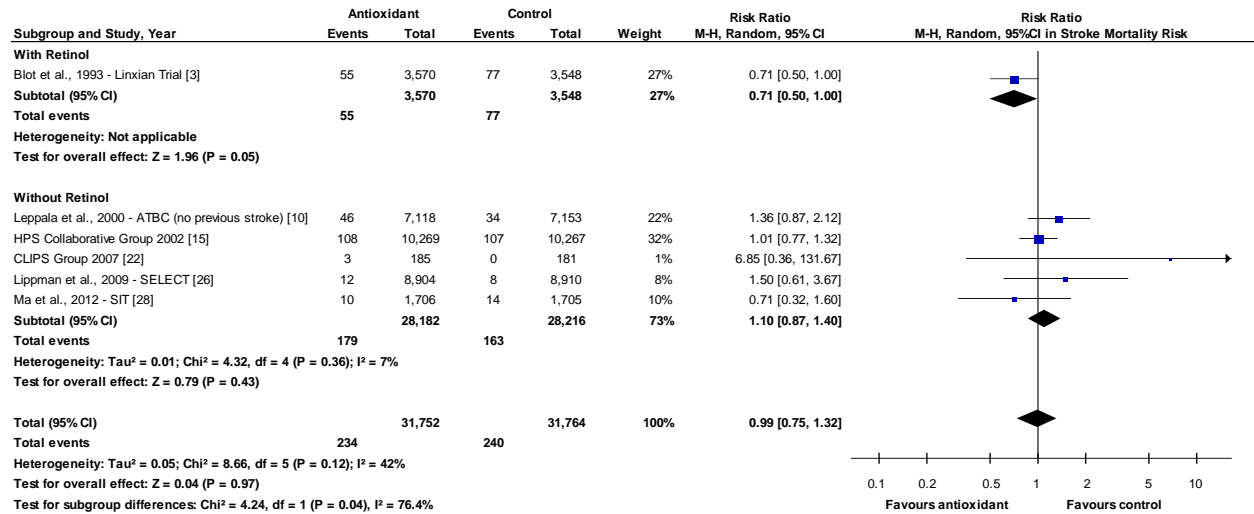

**Supplementary Figure 108. Sensitivity analysis of antioxidant supplementation and stroke mortality risk for studies with and without retinol.** NNT for antioxidant supplementation and stroke mortality risk for studies with retinol is 159. M-H, Mantel-Haenszel. The diamond represents the pooled risk estimate. Inter-study heterogeneity was tested using the Cochran Q statistic ( $\text{Chi}^2$ ) at a significance level of  $P < 0.10$ , and quantified by the  $I^2$  statistic. An  $I^2$  value  $\geq 50\%$  is considered to indicate substantial heterogeneity. All results are presented as risk ratios with 95% Confidence Intervals, using the Mantel-Haenszel method with random effects model.

## ONLINE SUPPORTING MATERIAL

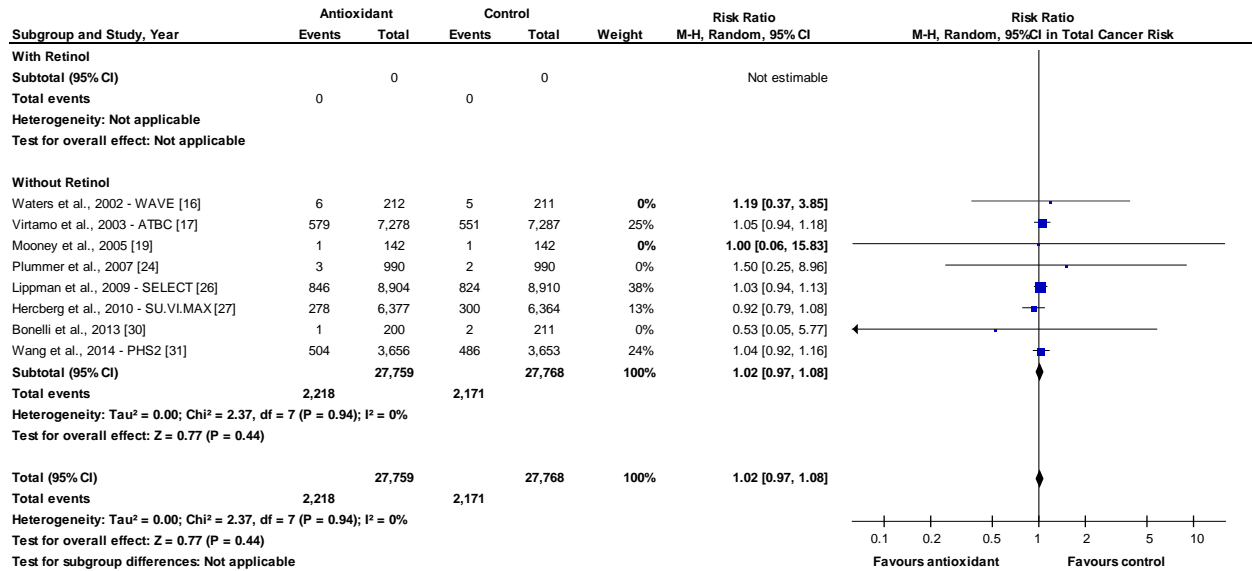

**Supplementary Figure 109. Sensitivity analysis of antioxidant supplementation and total cancer risk for studies with and without retinol.** M-H, Mantel-Haenszel. The diamond represents the pooled risk estimate. Inter-study heterogeneity was tested using the Cochran Q statistic (Chi<sup>2</sup>) at a significance level of P < 0.10, and quantified by the I<sup>2</sup> statistic. An I<sup>2</sup> value ≥ 50% is considered to indicate substantial heterogeneity. All results are presented as risk ratios with 95% Confidence Intervals, using the Mantel-Haenszel method with random effects model.

## ONLINE SUPPORTING MATERIAL

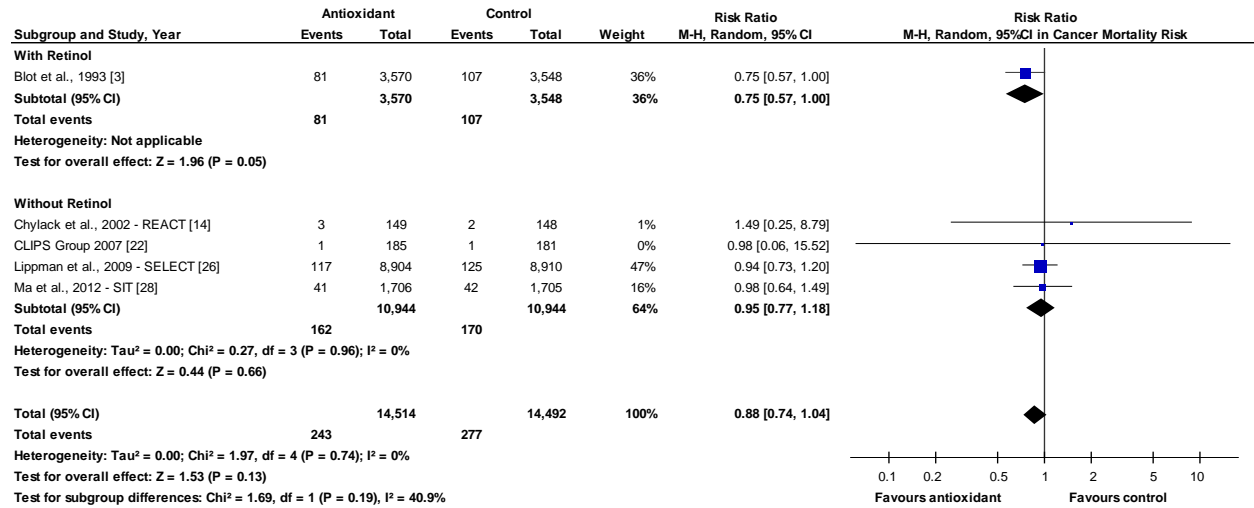

**Supplementary Figure 110. Sensitivity analysis of antioxidant supplementation and cancer mortality risk for studies with and without retinol. NNT for antioxidant supplementation and cancer mortality risk for studies with retinol is 133. M-H, Mantel-Haenszel. The diamond represents the pooled risk estimate. Inter-study heterogeneity was tested using the Cochran Q statistic (Chi<sup>2</sup>) at a significance level of P < 0.10, and quantified by the I<sup>2</sup> statistic. An I<sup>2</sup> value ≥ 50% is considered to indicate substantial heterogeneity. All results are presented as risk ratios with 95% Confidence Intervals, using the Mantel-Haenszel method with random effects model.**



## ONLINE SUPPORTING MATERIAL

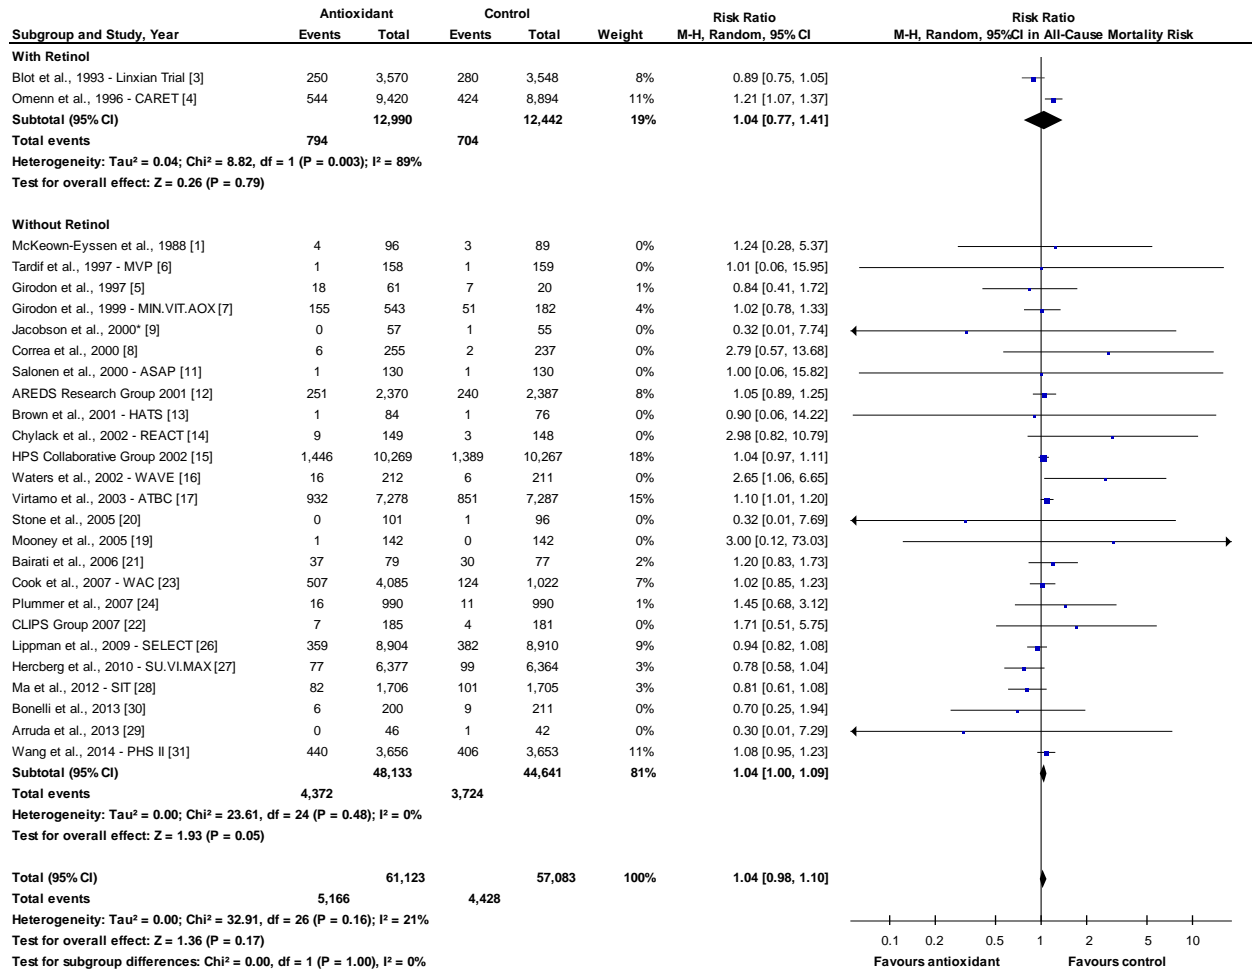

**Supplementary Figure 111. Sensitivity analysis of antioxidant supplementation and all-cause mortality risk for studies with and without Retinol. NNH for antioxidant supplementation and all-cause mortality risk for studies without retinol is 300. M-H, Mantel-Haenszel. \*Jacobson et al., 2000 – Data retrieved from meta-analysis Bjelakovic 2012 (44).** The diamond represents the pooled risk estimate. Inter-study heterogeneity was tested using the Cochran Q statistic (Chi<sup>2</sup>) at a significance level of P < 0.10, and quantified by the I<sup>2</sup> statistic. An I<sup>2</sup> value ≥ 50% is considered to indicate substantial heterogeneity. All results are presented as risk ratios with 95% Confidence Intervals, using the Mantel-Haenszel method with random effects model.

## ONLINE SUPPORTING MATERIAL

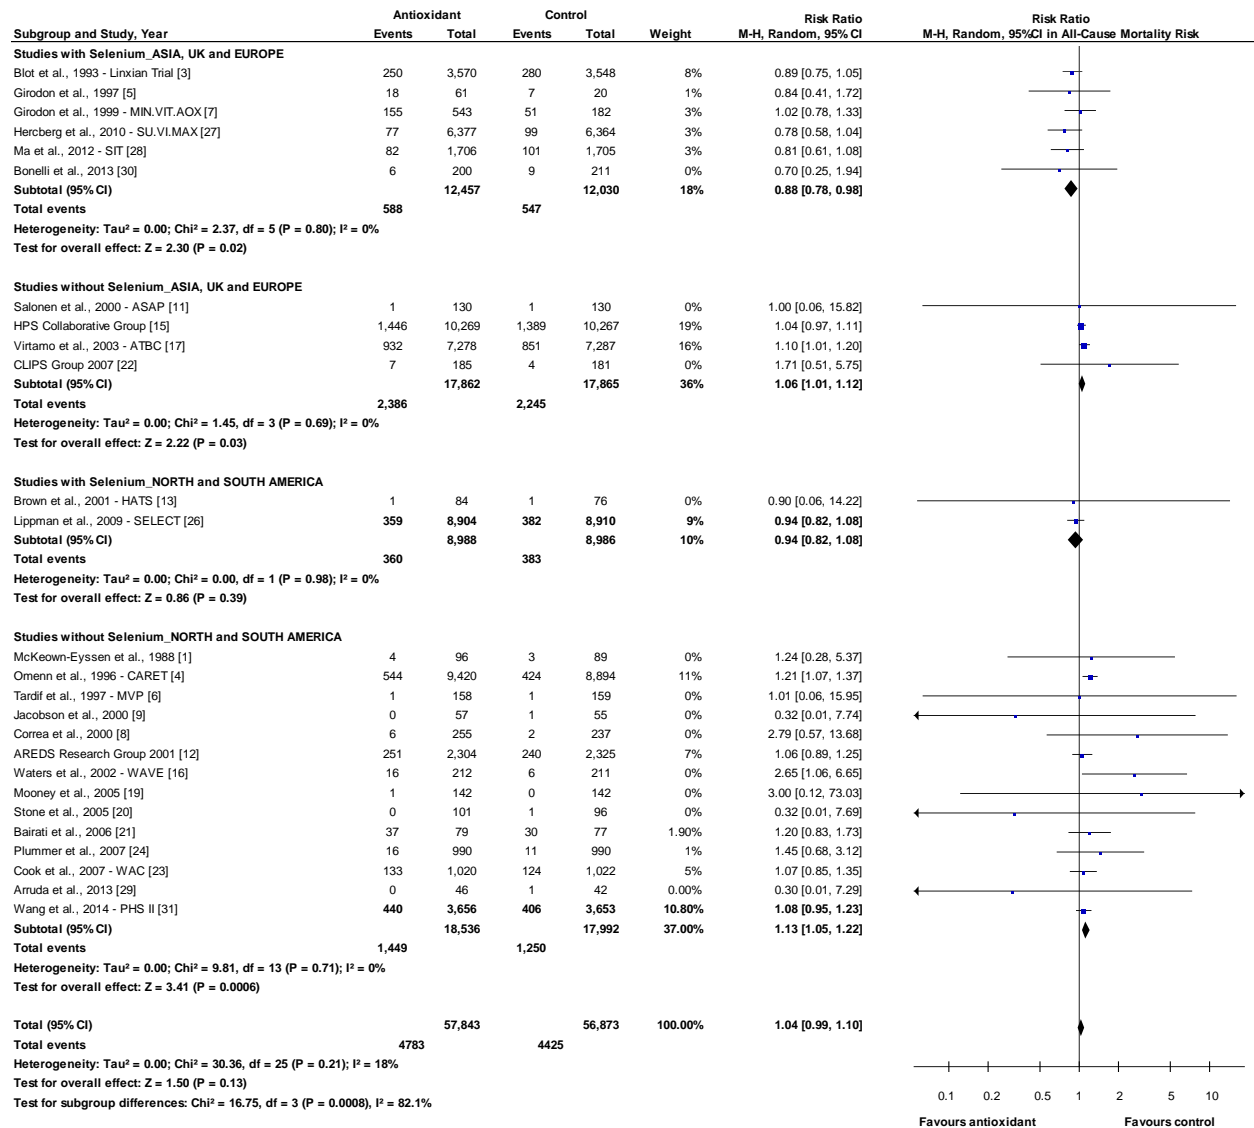

**Supplementary Figure 112. Forest plot showing antioxidants (with and without selenium) by region and all-cause mortality.** M-H, Mantel-Haenszel. **Chylack et al., 2002 – REACT was excluded from the plot as the study was conducted in both the USA and UK.** The diamond represents the pooled risk estimate. Inter-study heterogeneity was tested using the Cochran Q statistic (Chi<sup>2</sup>) at a significance level of P < 0.10, and quantified by the I<sup>2</sup> statistic. An I<sup>2</sup> value ≥ 50% is considered to indicate substantial heterogeneity. All results are presented as risk ratios with 95% Confidence Intervals, using the Mantel-Haenszel method with random effects model.

## ONLINE SUPPORTING MATERIAL

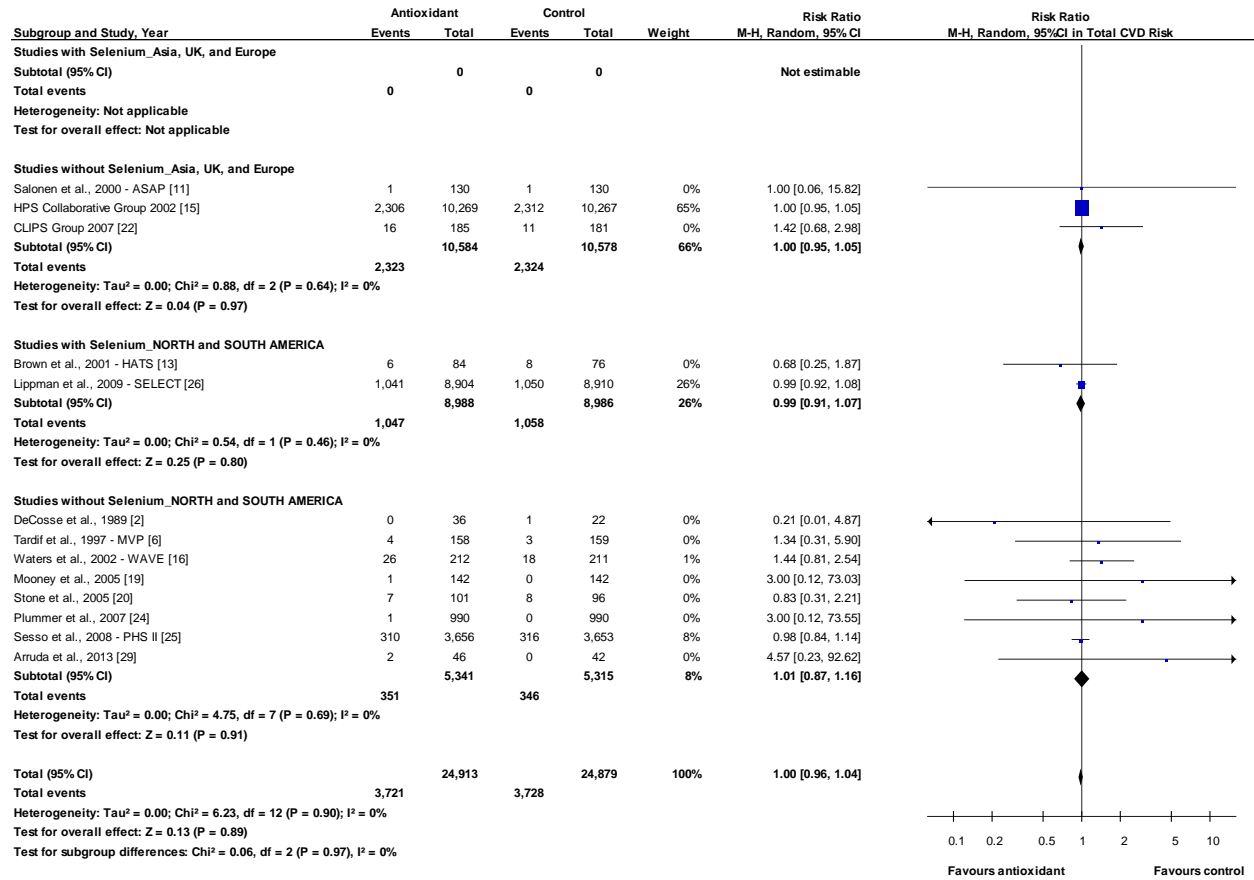

**Supplementary Figure 113. Forest plot showing antioxidants (with and without selenium) by region and total CVD. M-H, Mantel-Haenszel. Chylack et al., 2002 – REACT was excluded from the plot as the study was conducted in both the USA and UK. The diamond represents the pooled risk estimate. Inter-study heterogeneity was tested using the Cochran Q statistic (Chi<sup>2</sup>) at a significance level of P < 0.10, and quantified by the I<sup>2</sup> statistic. An I<sup>2</sup> value ≥ 50% is considered to indicate substantial heterogeneity. All results are presented as risk ratios with 95% Confidence Intervals, using the Mantel-Haenszel method with random effects model.**

## ONLINE SUPPORTING MATERIAL

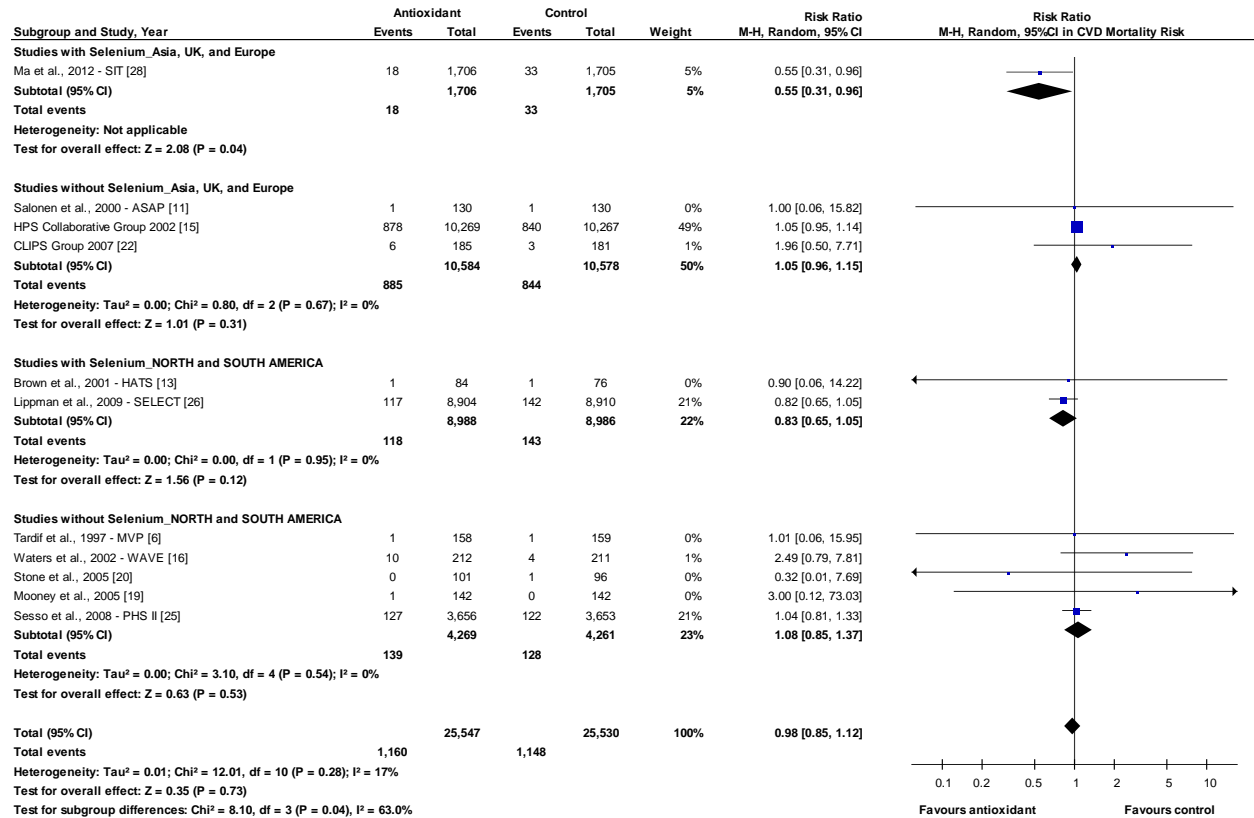

**Supplementary Figure 114. Forest plot showing antioxidants (with and without selenium) by region and CVD mortality.** M-H, Mantel-Haenszel. **Chylack et al., 2002 – REACT was excluded from the plot as the study was conducted in both the USA and UK.** The diamond represents the pooled risk estimate. Inter-study heterogeneity was tested using the Cochran Q statistic (Chi<sup>2</sup>) at a significance level of P < 0.10, and quantified by the I<sup>2</sup> statistic. An I<sup>2</sup> value ≥ 50% is considered to indicate substantial heterogeneity. All results are presented as risk ratios with 95% Confidence Intervals, using the Mantel-Haenszel method with random effects model.

## ONLINE SUPPORTING MATERIAL

### References

1. McKeown-Eyssen G, Holloway C, Jazmaji V, Bright-See E, Dion P, Bruce WR. A randomized trial of vitamins C and E in the prevention of recurrence of colorectal polyps. *Cancer research* 1988;48(16):4701-5.
2. DeCosse JJ, Miller HH, Lesser ML. Effect of wheat fiber and vitamins C and E on rectal polyps in patients with familial adenomatous polyposis. *Journal of the National Cancer Institute* 1989;81(17):1290-7. doi: 10.1093/jnci/81.17.1290.
3. Blot WJ, Li JY, Taylor PR, Guo W, Dawsey S, Wang GQ, Yang CS, Zheng SF, Gail M, Li GY, et al. Nutrition intervention trials in Linxian, China: supplementation with specific vitamin/mineral combinations, cancer incidence, and disease-specific mortality in the general population. *Journal of the National Cancer Institute* 1993;85(18):1483-92. doi: 10.1093/jnci/85.18.1483.
4. Omenn GS, Goodman GE, Thornquist MD, Balmes J, Cullen MR, Glass A, Keogh JP, Meyskens FL, Valanis B, Williams JH, et al. Effects of a combination of beta carotene and vitamin A on lung cancer and cardiovascular disease. *The New England journal of medicine* 1996;334(18):1150-5. doi: 10.1056/nejm199605023341802.
5. Girodon F, Lombard M, Galan P, Brunet-Lecomte P, Monget AL, Arnaud J, Preziosi P, Hercberg S. Effect of micronutrient supplementation on infection in institutionalized elderly subjects: a controlled trial. *Annals of nutrition & metabolism* 1997;41(2):98-107.
6. Tardif JC, Cote G, Lesperance J, Bourassa M, Lambert J, Doucet S, Bilodeau L, Nattel S, de Guise P. Probucol and multivitamins in the prevention of restenosis after coronary angioplasty. Multivitamins and Probucol Study Group. *The New England journal of medicine* 1997;337(6):365-72. doi: 10.1056/nejm199708073370601.
7. Girodon F, Galan P, Monget AL, Boutron-Ruault MC, Brunet-Lecomte P, Preziosi P, Arnaud J, Manuguerra JC, Hercberg S. Impact of trace elements and vitamin supplementation on immunity and infections in institutionalized elderly patients: a randomized controlled trial. MIN. VIT. AOX. geriatric network. *Archives of internal medicine* 1999;159(7):748-54.
8. Correa P, Fontham ET, Bravo JC, Bravo LE, Ruiz B, Zarama G, Realpe JL, Malcom GT, Li D, Johnson WD, et al. Chemoprevention of gastric dysplasia: randomized trial of antioxidant supplements and anti-helicobacter pylori therapy. *Journal of the National Cancer Institute* 2000;92(23):1881-8.
9. Jacobson JS, Begg MD, Wang LW, Wang Q, Agarwal M, Norkus E, Singh VN, Young TL, Yang D, Santella RM. Effects of a 6-month vitamin intervention on DNA damage in heavy smokers. *Cancer epidemiology, biomarkers & prevention : a publication of the American Association for Cancer Research, cosponsored by the American Society of Preventive Oncology* 2000;9(12):1303-11.
10. Leppala JM, Virtamo J, Fogelholm R, Albanes D, Taylor PR, Heinonen OP. Vitamin E and beta carotene supplementation in high risk for stroke: a subgroup analysis of the Alpha-Tocopherol, Beta-Carotene Cancer Prevention Study. *Archives of neurology* 2000;57(10):1503-9. doi: 10.1001/archneur.57.10.1503.
11. Salonen JT, Nyyssonen K, Salonen R, Lakka HM, Kaikkonen J, Porkkala-Sarataho E, Voutilainen S, Lakka TA, Rissanen T, Leskinen L, et al. Antioxidant Supplementation in Atherosclerosis Prevention (ASAP) study: a randomized trial of the effect of vitamins E and C on 3-year progression of carotid atherosclerosis. *Journal of internal medicine* 2000;248(5):377-86.
12. A randomized, placebo-controlled, clinical trial of high-dose supplementation with vitamins C and E and beta carotene for age-related cataract and vision loss: AREDS report no. 9. *Archives of ophthalmology (Chicago, Ill : 1960)* 2001;119(10):1439-52.

## ONLINE SUPPORTING MATERIAL

13. Brown BG, Zhao XQ, Chait A, Fisher LD, Cheung MC, Morse JS, Dowdy AA, Marino EK, Bolson EL, Alaupovic P, et al. Simvastatin and niacin, antioxidant vitamins, or the combination for the prevention of coronary disease. *The New England journal of medicine* 2001;345(22):1583-92. doi: 10.1056/NEJMoa011090.
14. Chylack LT, Jr., Brown NP, Bron A, Hurst M, Kopcke W, Thien U, Schalch W. The Roche European American Cataract Trial (REACT): a randomized clinical trial to investigate the efficacy of an oral antioxidant micronutrient mixture to slow progression of age-related cataract. *Ophthalmic epidemiology* 2002;9(1):49-80.
15. MRC/BHF Heart Protection Study of antioxidant vitamin supplementation in 20,536 high-risk individuals: a randomised placebo-controlled trial. *Lancet (London, England)* 2002;360(9326):23-33. doi: 10.1016/s0140-6736(02)09328-5.
16. Waters DD, Alderman EL, Hsia J, Howard BV, Cobb FR, Rogers WJ, Ouyang P, Thompson P, Tardif JC, Higginson L, et al. Effects of hormone replacement therapy and antioxidant vitamin supplements on coronary atherosclerosis in postmenopausal women: a randomized controlled trial. *Jama* 2002;288(19):2432-40.
17. Virtamo J, Pietinen P, Huttunen JK, Korhonen P, Malila N, Virtanen MJ, Albanes D, Taylor PR, Albert P. Incidence of cancer and mortality following alpha-tocopherol and beta-carotene supplementation: a postintervention follow-up. *Jama* 2003;290(4):476-85. doi: 10.1001/jama.290.4.476.
18. Tornwall ME, Virtamo J, Korhonen PA, Virtanen MJ, Taylor PR, Albanes D, Huttunen JK. Effect of alpha-tocopherol and beta-carotene supplementation on coronary heart disease during the 6-year post-trial follow-up in the ATBC study. *European heart journal* 2004;25(13):1171-8. doi: 10.1016/j.ehj.2004.05.007.
19. Mooney LA, Madsen AM, Tang D, Orjuela MA, Tsai WY, Garduno ER, Perera FP. Antioxidant vitamin supplementation reduces benzo(a)pyrene-DNA adducts and potential cancer risk in female smokers. *Cancer epidemiology, biomarkers & prevention : a publication of the American Association for Cancer Research, cosponsored by the American Society of Preventive Oncology* 2005;14(1):237-42.
20. Stone PH, Lloyd-Jones DM, Kinlay S, Frei B, Carlson W, Rubenstein J, Andrews TC, Johnstone M, Sopko G, Cole H, et al. Effect of intensive lipid lowering, with or without antioxidant vitamins, compared with moderate lipid lowering on myocardial ischemia in patients with stable coronary artery disease: the Vascular Basis for the Treatment of Myocardial Ischemia Study. *Circulation* 2005;111(14):1747-55. doi: 10.1161/01.cir.0000160866.90148.76.
21. Bairati I, Meyer F, Jobin E, Gelinas M, Fortin A, Nabid A, Brochet F, Tetu B. Antioxidant vitamins supplementation and mortality: a randomized trial in head and neck cancer patients. *International journal of cancer* 2006;119(9):2221-4. doi: 10.1002/ijc.22042.
22. Catalano M, Born G, Peto R. Prevention of serious vascular events by aspirin amongst patients with peripheral arterial disease: randomized, double-blind trial. *Journal of internal medicine* 2007;261(3):276-84. doi: 10.1111/j.1365-2796.2006.01763.x.
23. Cook NR, Albert CM, Gaziano JM, Zaharris E, MacFadyen J, Danielson E, Buring JE, Manson JE. A randomized factorial trial of vitamins C and E and beta carotene in the secondary prevention of cardiovascular events in women: results from the Women's Antioxidant Cardiovascular Study. *Archives of internal medicine* 2007;167(15):1610-8. doi: 10.1001/archinte.167.15.1610.
24. Plummer M, Vivas J, Lopez G, Bravo JC, Peraza S, Carillo E, Cano E, Castro D, Andrade O, Sanchez V, et al. Chemoprevention of precancerous gastric lesions with antioxidant vitamin supplementation: a randomized trial in a high-risk population. *Journal of the National Cancer Institute* 2007;99(2):137-46. doi: 10.1093/jnci/djk017.

## ONLINE SUPPORTING MATERIAL

25. Sesso HD, Buring JE, Christen WG, Kurth T, Belanger C, MacFadyen J, Bubes V, Manson JE, Glynn RJ, Gaziano JM. Vitamins E and C in the prevention of cardiovascular disease in men: the Physicians' Health Study II randomized controlled trial. *Jama* 2008;300(18):2123-33. doi: 10.1001/jama.2008.600.
26. Lippman SM, Klein EA, Goodman PJ, Lucia MS, Thompson IM, Ford LG, Parnes HL, Minasian LM, Gaziano JM, Hartline JA, et al. Effect of selenium and vitamin E on risk of prostate cancer and other cancers: the Selenium and Vitamin E Cancer Prevention Trial (SELECT). *Jama* 2009;301(1):39-51. doi: 10.1001/jama.2008.864.
27. Hercberg S, Kesse-Guyot E, Druesne-Pecollo N, Touvier M, Favier A, Latino-Martel P, Briancon S, Galan P. Incidence of cancers, ischemic cardiovascular diseases and mortality during 5-year follow-up after stopping antioxidant vitamins and minerals supplements: a postintervention follow-up in the SU.VI.MAX Study. *International journal of cancer* 2010;127(8):1875-81. doi: 10.1002/ijc.25201.
28. Ma JL, Zhang L, Brown LM, Li JY, Shen L, Pan KF, Liu WD, Hu Y, Han ZX, Crystal-Mansour S, et al. Fifteen-year effects of Helicobacter pylori, garlic, and vitamin treatments on gastric cancer incidence and mortality. *Journal of the National Cancer Institute* 2012;104(6):488-92. doi: 10.1093/jnci/djs003.
29. Arruda MM, Mecabo G, Rodrigues CA, Matsuda SS, Rabelo IB, Figueiredo MS. Antioxidant vitamins C and E supplementation increases markers of haemolysis in sickle cell anaemia patients: a randomized, double-blind, placebo-controlled trial. *Br J Haematol* 2013;160(5):688-700. doi: 10.1111/bjh.12185.
30. Bonelli L, Puntoni M, Gatteschi B, Massa P, Missale G, Munizzi F, Turbino L, Villanacci V, De Censi A, Bruzzi P. Antioxidant supplement and long-term reduction of recurrent adenomas of the large bowel. A double-blind randomized trial. *J Gastroenterol* 2013;48(6):698-705. doi: 10.1007/s00535-012-0691-z.
31. Wang L, Sesso HD, Glynn RJ, Christen WG, Bubes V, Manson JE, Buring JE, Gaziano JM. Vitamin E and C supplementation and risk of cancer in men: posttrial follow-up in the Physicians' Health Study II randomized trial. *The American journal of clinical nutrition* 2014;100(3):915-23. doi: 10.3945/ajcn.114.085480.
32. Korpela HK, Jussila E, Kemila S, Kaariainen M, Kaariainen T, Sotaniemi E. A. Effect of selenium supplementation after acute myocardial infarction. *Research communications in chemical pathology and pharmacology* 1989;65(2):249-52.
33. Duffield-Lillico AJR, M. E. Turnbull, B. W. Combs, G. F. Slate, E. H. Fischbach, L. A. Marshall, J. R. Clark, L. C. Baseline characteristics and the effect of selenium supplementation on cancer incidence in a randomized clinical trial: a summary report of the Nutritional Prevention of Cancer Trial. *Cancer epidemiology, biomarkers & prevention* 2002;11(7):630-9.
34. Limburg PJ, Wei W, Ahnen DJ, Qiao Y, Hawk ET, Wang G, Giffen CA, Wang G, Roth MJ, Lu N, et al. Randomized, placebo-controlled, esophageal squamous cell cancer chemoprevention trial of selenomethionine and celecoxib. *Gastroenterology* 2005;129(3):863-73. doi: 10.1053/j.gastro.2005.06.024.
35. Stranges S, Marshall JR, Trevisan M, Natarajan R, Donahue RP, Combs GF, Farinaro E, Clark LC, Reid ME. Effects of selenium supplementation on cardiovascular disease incidence and mortality: secondary analyses in a randomized clinical trial. *American journal of epidemiology* 2006;163(8):694-9. doi: 10.1093/aje/kwj097.
36. Stratton MS, Algotar AM, Ranger-Moore J, Stratton SP, Slate EH, Hsu CH, Thompson PA, Clark LC, Ahmann FR. Oral selenium supplementation has no effect on prostate-specific antigen velocity

## ONLINE SUPPORTING MATERIAL

- in men undergoing active surveillance for localized prostate cancer. *Cancer prevention research (Philadelphia, Pa)* 2010;3(8):1035-43. doi: 10.1158/1940-6207.Capr-09-0143.
37. Rayman MP, Winther KH, Pastor-Barriuso R, Cold F, Thvilum M, Stranges S, Guallar E, Cold S. Effect of long-term selenium supplementation on mortality: Results from a multiple-dose, randomised controlled trial. *Free radical biology & medicine* 2018;127:46-54. doi: 10.1016/j.freeradbiomed.2018.02.015.
  38. Marshall JR, Tangen CM, Sakr WA, Wood DP, Jr., Berry DL, Klein EA, Lippman SM, Parnes HL, Alberts DS, Jarrard DF, et al. Phase III trial of selenium to prevent prostate cancer in men with high-grade prostatic intraepithelial neoplasia: SWOG S9917. *Cancer prevention research (Philadelphia, Pa)* 2011;4(11):1761-9. doi: 10.1158/1940-6207.capr-10-0343.
  39. Algotar AM, Stratton MS, Ahmann FR, Ranger-Moore J, Nagle RB, Thompson PA, Slate E, Hsu CH, Dalkin BL, Sindhwani P, et al. Phase 3 clinical trial investigating the effect of selenium supplementation in men at high-risk for prostate cancer. *The Prostate* 2013;73(3):328-35. doi: 10.1002/pros.22573.
  40. Karp DD, Lee SJ, Keller SM, Wright GS, Aisner S, Belinsky SA, Johnson DH, Johnston MR, Goodman G, Clamon G, et al. Randomized, double-blind, placebo-controlled, phase III chemoprevention trial of selenium supplementation in patients with resected stage I non-small-cell lung cancer: ECOG 5597. *Journal of clinical oncology : official journal of the American Society of Clinical Oncology* 2013;31(33):4179-87. doi: 10.1200/jco.2013.49.2173.
  41. Goossens MEZ, M. P. van Poppel, H. Joniau, S. Ackaert, K. Ameye, F. Billiet, I. Braeckman, J. Breugelmans, A. Darras, J. Dilen, K. Goeman, L. Tombal, B. Van Bruwaene, S. Van Cleyenbreugel, B. Van der Aa, F. Vekemans, K. Buntinx, F. Phase III randomised chemoprevention study with selenium on the recurrence of non-invasive urothelial carcinoma. *The SELEnium and BLAdDer cancer Trial. European journal of cancer* 2016;69:9-18.
  42. Thompson PA, Ashbeck EL, Roe DJ, Fales L, Buckmeier J, Wang F, Bhattacharyya A, Hsu CH, Chow HH, Ahnen DJ, et al. Selenium Supplementation for Prevention of Colorectal Adenomas and Risk of Associated Type 2 Diabetes. *Journal of the National Cancer Institute* 2016;108(12). doi: 10.1093/jnci/djw152.
  43. Rayman MP, Stranges S, Griffin BA, Pastor-Barriuso R, Guallar E. Effect of supplementation with high-selenium yeast on plasma lipids: a randomized trial. *Annals of internal medicine* 2011;154(10):656-65. doi: 10.7326/0003-4819-154-10-201105170-00005.
  44. Bjelakovic G, Nikolova D, Gluud LL, Simonetti RG, Gluud C. Antioxidant supplements for prevention of mortality in healthy participants and patients with various diseases. *The Cochrane database of systematic reviews* 2012(3):Cd007176. doi: 10.1002/14651858.CD007176.pub2.
